# Supplementary material for: Alternative polyadenylation factors link cell cycle to migration
Source: Genome Biol. 2018 Oct 25;19:176. doi: 10.1186/s13059-018-1551-9 (PMC6203201; doi:10.1186/s13059-018-1551-9)
Supplement: Supplementary file 9 — Gene Ontology for alternative polyadenylation. (XLSX 618 kb) [file 13059_2018_1551_MOESM9_ESM.xlsx]

## Sheet: gProfiler
Additional file 9. Gene Ontology categories for genes with two polyadenylation sites that undergo significant changes in distal polyadenylation site use between proliferating and contact-inhibited cells
#	signf	p-value	T	Q	Q&T	Q&T/Q	Q&T/T	term ID	t type	t group	t name	t depth	Q&T list
1	!	0.000782	8684	680	509	0.749	0.059	GO:0005515	MF	2	protein binding	3	DPM1,NDUFAF7,CIAPIN1,GCFC2,RALA,UBE3C,METTL13,RNF216,PTBP1,ANLN,SLC30A9,WWTR1,ZFP64,UBR2,PHF20,KPNA6,FAS,BRD9,UBA6,GABARAPL2,ADSS,TBC1D23,METTL1,TDP1,DCUN1D1,MAP4,ELN,TRAPPC3,EIF2AK2,SNRNP40,MED29,ZC3H15,NFYC,ATXN3,EML1,SP100,MAPK6,GNB5,EXOC5,FSTL3,RNF126,TCF3,MAP3K13,LMAN1,TIMM21,FOSL2,RAB7A,SART3,UBE2A,UBE2K,TULP3,GNB1,MKNK1,LYRM2,DIS3,OXCT1,WBP11,SEPHS1,HUWE1,KHSRP,ANKRD10,NSFL1C,SNX5,TBX5,BRA…
1	!	0.00247	5189	680	329	0.484	0.063	GO:1901564	BP	3	organonitrogen compound metabolic process	4	DPM1,NDUFAF7,SLC25A13,HCCS,COX10,UBE3C,RNF216,UBR7,MAP4K5,COX15,WWTR1,SERPINB1,UBR2,PHF20,FAS,UBA6,GABARAPL2,ADSS,DCUN1D1,MRPS10,EIF2AK2,ATXN3,DDX3Y,MAPK6,FSTL3,RNF126,MAP3K13,LMAN1,RAB7A,SART3,UBE2A,UBE2K,MKNK1,STK17B,SEPHS1,HUWE1,KHSRP,NSFL1C,TASP1,BRAP,USP48,PPP2R3C,CRAT,CIRBP,TRIOBP,HSCB,POLDIP3,RPL3,MYH9,DESI1,PIGH,VRK1,BRMS1L,DOK5,SAMHD1,USP14,UBL4A,LONP2,POLR2C,MTFMT,NBN,IMPAD1,TUSC3,VRK3,…
1	!	0.0124	4394	680	282	0.415	0.064	GO:0019538	BP	3	protein metabolic process	5	DPM1,NDUFAF7,HCCS,UBE3C,RNF216,UBR7,MAP4K5,WWTR1,SERPINB1,UBR2,PHF20,FAS,UBA6,GABARAPL2,DCUN1D1,MRPS10,EIF2AK2,ATXN3,DDX3Y,MAPK6,FSTL3,RNF126,MAP3K13,LMAN1,RAB7A,SART3,UBE2A,UBE2K,MKNK1,STK17B,SEPHS1,HUWE1,KHSRP,NSFL1C,TASP1,BRAP,USP48,PPP2R3C,CIRBP,TRIOBP,HSCB,POLDIP3,RPL3,MYH9,DESI1,PIGH,VRK1,BRMS1L,DOK5,USP14,UBL4A,LONP2,POLR2C,MTFMT,NBN,IMPAD1,TUSC3,VRK3,AKAP8,CEP41,PPP3CB,LHPP,LARP4B,GLRX3,P…
1	!	0.0126	4029	680	262	0.385	0.065	GO:0044267	BP	3	cellular protein metabolic process	5	DPM1,NDUFAF7,HCCS,UBE3C,RNF216,UBR7,MAP4K5,WWTR1,SERPINB1,UBR2,PHF20,FAS,UBA6,GABARAPL2,DCUN1D1,MRPS10,EIF2AK2,ATXN3,DDX3Y,MAPK6,FSTL3,RNF126,MAP3K13,LMAN1,RAB7A,SART3,UBE2A,UBE2K,MKNK1,STK17B,SEPHS1,HUWE1,KHSRP,NSFL1C,BRAP,USP48,PPP2R3C,CIRBP,TRIOBP,POLDIP3,RPL3,MYH9,PIGH,VRK1,BRMS1L,DOK5,USP14,UBL4A,LONP2,POLR2C,MTFMT,NBN,TUSC3,VRK3,AKAP8,CEP41,PPP3CB,LHPP,LARP4B,PPIF,PIGL,DUSP3,PRKAR1A,DCUN1D4…
1	!	0.0186	838	680	73	0.107	0.087	GO:0006396	BP	3	RNA processing	8	GCFC2,PTBP1,METTL1,SNRNP40,SART3,DIS3,WBP11,KHSRP,HNRNPH3,NHP2L1,POLDIP3,RPL3,RBFOX2,RNMT,POLR2C,MTFMT,INTS10,HNRNPUL1,MAGOHB,KRR1,PRPF4B,CLK4,NCBP2,PNO1,TIA1,RPL22,WDR77,IVNS1ABP,KHDRBS1,RBBP6,GTF2F1,HNRNPR,SAFB2,EXOSC2,DHX30,UTP3,RBM17,C2ORF49,CIR1,PPP3CA,TXNL4B,CSNK1D,APP,INTS7,RPL7L1,RBMS1,CHTOP,SRSF2,TYW3,TYW5,POLR2H,PAPD4,PSIP1,LARP6,SMAD3,TSR1,RPSA,ZRSR2,PA2G4,RBM4B,LARP7,RSRC1,CSTF3,CMTR2…
1	!	0.034	1648	680	123	0.181	0.075	GO:0046907	BP	3	intracellular transport	4	SLC25A13,WWTR1,KPNA6,LSG1,TRAPPC3,AP3D1,SP100,RNF126,LMAN1,TIMM21,RAB7A,WBP11,HUWE1,SNX5,SEC22C,POLDIP3,RPL3,SLC25A17,DNAJC5,ARFRP1,TM9SF4,LONP2,TBC1D17,KDELR1,BET1,TMEM106B,YKT6,PPIF,EHD1,LIN7A,MAGOHB,COPZ1,RAB35,FAF2,OGG1,NCBP2,SNX4,STAM2,ATF2,ICMT,RPL22,DOCK7,WLS,SSX2IP,RAB14,VPS4B,SIL1,KHDRBS1,FYTTD1,VPS26A,MRS2,SOX4,RBCK1,NUP214,SNX9,NDFIP1,NMT1,RDX,DYNC2LI1,ACTR2,BBS7,NUP54,G3BP2,SCARB2,PPP…
1	!	0.0463	1478	680	112	0.165	0.076	GO:0003723	MF	2	RNA binding	5	PTBP1,METTL1,MAP4,EIF2AK2,SNRNP40,ZC3H15,DDX3Y,SART3,DIS3,WBP11,HUWE1,KHSRP,HNRNPH3,CIRBP,NHP2L1,POLDIP3,RPL3,RBFOX2,MYH9,SAMHD1,RNMT,UBFD1,AKAP8,HNRNPUL1,LARP4B,GLRX3,LRRC59,LTA4H,MAGOHB,KRR1,PRPF4B,NCBP2,HDLBP,PNO1,TIA1,RPL22,UCHL5,RBM18,KHDRBS1,FYTTD1,RBBP6,LRRFIP1,CNOT1,GTF2F1,RRBP1,HNRNPR,MACF1,ZFP36,SAFB2,EXOSC2,PRRC2B,EIF2S3,DHX30,PTCD3,UTP3,EIF2S1,RBM17,RDX,HADHB,G3BP2,UBAP2L,ARF1,C1ORF35…
1		0.075	8707	680	499	0.734	0.057	GO:0008152	BP	3	metabolic process	2	DPM1,NDUFAF7,SLC25A13,HCCS,CIAPIN1,GCFC2,COX10,UBE3C,METTL13,RNF216,PTBP1,UBR7,MAP4K5,SLC30A9,COX15,WWTR1,ZFP64,SERPINB1,UBR2,PHF20,KPNA6,FAS,BRD9,UBA6,GABARAPL2,ADSS,METTL1,PI4K2B,TDP1,DCUN1D1,MRPS10,DKK3,EIF2AK2,SLC2A3,SNRNP40,MED29,AP3D1,NFYC,ATXN3,DDX3Y,SP100,MAPK6,FSTL3,RNF126,TCF3,MAP3K13,LMAN1,FOSL2,RAB7A,SART3,UBE2A,UBE2K,TULP3,MKNK1,STK17B,KCNK2,DIS3,OXCT1,WBP11,SEPHS1,HUWE1,KHSRP,CRLS1,…
1		0.0804	1125	680	89	0.131	0.079	GO:0009057	BP	3	macromolecule catabolic process	5	RNF216,WWTR1,UBR2,UBA6,GABARAPL2,ATXN3,RNF126,RAB7A,UBE2A,UBE2K,DIS3,HUWE1,KHSRP,NSFL1C,USP48,CIRBP,RPL3,USP14,LONP2,KCTD10,MAGOHB,FAF2,WNT5A,NCBP2,SDC1,PCYOX1,RPL22,UCHL5,VPS4B,IDE,RBBP6,RNF11,SDC4,RNF114,USP22,CNOT1,PSMF1,RBCK1,HNRNPR,NUP214,ZFP36,DDA1,SNX9,EXOSC2,RLIM,NDFIP1,USP15,GNS,CCDC115,UGGT1,YME1L1,RNF121,RDX,FBXO11,BBS7,TMTC3,CSNK1D,LYPLAL1,RNF145,RMND5B,GNA12,USP12,LARP1,CNOT8,PINK1,A…
1		0.085	8205	680	474	0.697	0.058	GO:0044237	BP	3	cellular metabolic process	3	DPM1,NDUFAF7,SLC25A13,HCCS,CIAPIN1,GCFC2,COX10,UBE3C,RNF216,PTBP1,UBR7,MAP4K5,SLC30A9,COX15,WWTR1,ZFP64,SERPINB1,UBR2,PHF20,KPNA6,FAS,BRD9,UBA6,GABARAPL2,ADSS,METTL1,PI4K2B,TDP1,DCUN1D1,MRPS10,DKK3,EIF2AK2,SLC2A3,SNRNP40,MED29,NFYC,ATXN3,DDX3Y,SP100,MAPK6,FSTL3,RNF126,TCF3,MAP3K13,LMAN1,FOSL2,RAB7A,SART3,UBE2A,UBE2K,TULP3,MKNK1,STK17B,KCNK2,DIS3,OXCT1,WBP11,SEPHS1,HUWE1,KHSRP,CRLS1,NSFL1C,SNX5,TA…
1		0.0962	1004	680	81	0.119	0.081	GO:1901565	BP	3	organonitrogen compound catabolic process	5	RNF216,WWTR1,UBR2,UBA6,GABARAPL2,ATXN3,RNF126,RAB7A,UBE2A,UBE2K,HUWE1,NSFL1C,USP48,SAMHD1,USP14,LONP2,KCTD10,LTA4H,FAF2,OGG1,WNT5A,SDC1,PCYOX1,UCHL5,ECE1,VPS4B,IDE,RBBP6,RNF11,SDC4,RNF114,USP22,PSMF1,RBCK1,DDA1,SNX9,RLIM,NDFIP1,MCCC2,USP15,GNS,GLUL,MTHFS,CCDC115,UGGT1,YME1L1,RNF121,RDX,FBXO11,BBS7,TMTC3,CSNK1D,LYPLAL1,RNF145,RMND5B,GNA12,AUH,USP12,PINK1,AMFR,RCHY1,UBAP1,HGSNAT,VCP,ARIH1,SMAD3,FBX…
1		0.102	237	680	28	0.041	0.118	GO:0016197	BP	3	endosomal transport	5	AP3D1,RNF126,RAB7A,SNX5,ARFRP1,TBC1D17,YKT6,EHD1,RAB35,SNX4,STAM2,RAB14,VPS4B,VPS26A,SNX9,RDX,VPS33A,ARF1,VPS26B,TGOLN2,TMEM87B,UBAP1,VCP,AP1G1,UBXN6,TRAK1,TRIM27,EMP2
1		0.128	1847	680	132	0.194	0.071	GO:0051649	BP	3	establishment of localization in cell	4	SLC25A13,WWTR1,KPNA6,LSG1,MAP4,TRAPPC3,AP3D1,SP100,RNF126,LMAN1,TIMM21,RAB7A,OXCT1,WBP11,HUWE1,SNX5,SEC22C,POLDIP3,RPL3,MYH9,SLC25A17,DNAJC5,ARFRP1,TM9SF4,LONP2,TBC1D17,KDELR1,BET1,TMEM106B,YKT6,PPP3CB,PPIF,EHD1,LIN7A,MAGOHB,COPZ1,RAB35,FAF2,OGG1,NCBP2,SNX4,STAM2,STK25,ATF2,ICMT,RPL22,DOCK7,WLS,SSX2IP,RAB14,VPS4B,SIL1,KHDRBS1,GPSM2,FYTTD1,ZWINT,VPS26A,MRS2,SOX4,RBCK1,NUP214,SNX9,NDFIP1,NMT1,RDX,D…
1		0.147	2314	680	159	0.234	0.069	GO:0051641	BP	3	cellular localization	3	SLC25A13,RALA,WWTR1,KPNA6,LSG1,MAP4,TRAPPC3,AP3D1,SP100,EXOC5,RNF126,LMAN1,TIMM21,RAB7A,TULP3,OXCT1,WBP11,HUWE1,SNX5,SEC22C,POLDIP3,RPL3,MYH9,SLC25A17,DNAJC5,ARFRP1,TM9SF4,UBL4A,LONP2,TBC1D17,KDELR1,BET1,TMEM106B,CEP41,YKT6,PPP3CB,PPIF,COL1A1,EHD1,LIN7A,MAGOHB,COPZ1,RAB35,FAF2,OGG1,WNT5A,NCBP2,SNX4,STAM2,STK25,ATF2,TIA1,ICMT,RPL22,DOCK7,WLS,SSX2IP,RAB14,VPS4B,SUPT7L,TCTN3,SIL1,KHDRBS1,GPSM2,FYTTD…
1		0.162	740	680	63	0.093	0.085	GO:0030163	BP	3	protein catabolic process	6	RNF216,WWTR1,UBR2,UBA6,GABARAPL2,ATXN3,RNF126,RAB7A,UBE2A,UBE2K,HUWE1,NSFL1C,USP48,USP14,LONP2,KCTD10,FAF2,WNT5A,PCYOX1,UCHL5,VPS4B,IDE,RBBP6,RNF11,RNF114,USP22,PSMF1,RBCK1,DDA1,SNX9,RLIM,NDFIP1,USP15,CCDC115,UGGT1,YME1L1,RNF121,RDX,FBXO11,BBS7,TMTC3,CSNK1D,LYPLAL1,RNF145,RMND5B,GNA12,USP12,PINK1,AMFR,RCHY1,UBAP1,VCP,ARIH1,SMAD3,FBXO22,UBXN6,SOCS6,OAZ2,BACE2,BACE1,UBE2H,SF3B3,GET4
1		0.167	81	680	14	0.021	0.173	GO:0007041	BP	3	lysosomal transport	6	AP3D1,RAB7A,TMEM106B,VPS4B,SCARB2,VPS33A,ARF1,PINK1,HGSNAT,VCP,AP1G1,UBXN6,TRAK1,AP3M1
1		0.181	53	680	11	0.016	0.208	GO:0019003	MF	2	GDP binding	7	RALA,RAB7A,RAB35,RAB14,RAP2C,ARF1,DYNC1LI1,PRPS1,RAB8B,RAB31,RAB3B
1		0.192	435	680	42	0.062	0.097	GO:0006397	BP	3	mRNA processing	9	GCFC2,PTBP1,SNRNP40,SART3,WBP11,KHSRP,HNRNPH3,NHP2L1,POLDIP3,RBFOX2,RNMT,POLR2C,HNRNPUL1,MAGOHB,PRPF4B,NCBP2,TIA1,WDR77,KHDRBS1,RBBP6,GTF2F1,HNRNPR,SAFB2,RBM17,CIR1,TXNL4B,APP,CHTOP,SRSF2,POLR2H,PAPD4,PSIP1,ZRSR2,RBM4B,RSRC1,CSTF3,CMTR2,SF3A3,SF3B3,TSEN15,ISY1,C7ORF55-LUC7L2
1		0.322	306	680	32	0.047	0.105	GO:0001883	MF	2	purine nucleoside binding	5	RALA,ADSS,LSG1,RAB7A,SEPHS1,ARFRP1,DRG2,EHD1,RAB35,RAB14,RAP2C,OARD1,EIF2S3,RRAS2,ARF1,ARL8A,DYNC1LI1,GNA12,PRPS1,AK3,GTPBP8,RAB8B,TSR1,RAB31,RAB3B,TUBB6,TUBB,ATL1,NUDT16,OPA1,NRAS,FPGT
1		0.378	625	680	54	0.079	0.086	GO:0044257	BP	3	cellular protein catabolic process	6	RNF216,WWTR1,UBR2,UBA6,GABARAPL2,ATXN3,RNF126,RAB7A,UBE2A,UBE2K,HUWE1,NSFL1C,USP48,USP14,LONP2,KCTD10,FAF2,PCYOX1,UCHL5,VPS4B,IDE,RBBP6,RNF11,RNF114,USP22,PSMF1,RBCK1,DDA1,RLIM,USP15,CCDC115,UGGT1,YME1L1,RNF121,RDX,FBXO11,BBS7,TMTC3,CSNK1D,RNF145,RMND5B,GNA12,USP12,PINK1,AMFR,RCHY1,UBAP1,VCP,ARIH1,FBXO22,UBXN6,SOCS6,UBE2H,GET4
1		0.444	8324	680	475	0.699	0.057	GO:0071704	BP	3	organic substance metabolic process	3	DPM1,NDUFAF7,SLC25A13,HCCS,GCFC2,COX10,UBE3C,RNF216,PTBP1,UBR7,MAP4K5,SLC30A9,COX15,WWTR1,ZFP64,SERPINB1,UBR2,PHF20,KPNA6,FAS,BRD9,UBA6,GABARAPL2,ADSS,METTL1,PI4K2B,TDP1,DCUN1D1,MRPS10,DKK3,EIF2AK2,SLC2A3,SNRNP40,MED29,NFYC,ATXN3,DDX3Y,SP100,MAPK6,FSTL3,RNF126,TCF3,MAP3K13,LMAN1,FOSL2,RAB7A,SART3,UBE2A,UBE2K,TULP3,MKNK1,STK17B,KCNK2,DIS3,OXCT1,WBP11,SEPHS1,HUWE1,KHSRP,CRLS1,NSFL1C,TASP1,TBX5,BRAP…
1		0.445	584	680	51	0.075	0.087	GO:0051603	BP	3	proteolysis involved in cellular protein catabolic process	7	RNF216,WWTR1,UBR2,UBA6,GABARAPL2,ATXN3,RNF126,UBE2A,UBE2K,HUWE1,NSFL1C,USP48,USP14,LONP2,KCTD10,FAF2,PCYOX1,UCHL5,VPS4B,IDE,RBBP6,RNF11,RNF114,USP22,PSMF1,RBCK1,DDA1,RLIM,USP15,UGGT1,YME1L1,RNF121,FBXO11,BBS7,TMTC3,CSNK1D,RNF145,RMND5B,GNA12,USP12,PINK1,AMFR,RCHY1,UBAP1,VCP,ARIH1,FBXO22,UBXN6,SOCS6,UBE2H,GET4
1		0.461	312	680	32	0.047	0.103	GO:0019001	MF	2	guanyl nucleotide binding	7	RALA,ADSS,LSG1,RAB7A,SEPHS1,ARFRP1,SAMHD1,DRG2,EHD1,RAB35,RAB14,RAP2C,EIF2S3,RRAS2,ARF1,ARL8A,DYNC1LI1,GNA12,PRPS1,AK3,GTPBP8,RAB8B,TSR1,RAB31,RAB3B,TUBB6,TUBB,ATL1,NUDT16,OPA1,NRAS,FPGT
1		0.501	895	680	71	0.104	0.079	GO:0043603	BP	3	cellular amide metabolic process	5	MRPS10,EIF2AK2,DDX3Y,MKNK1,KHSRP,CIRBP,POLDIP3,RPL3,POLR2C,MTFMT,LARP4B,LTA4H,NCBP2,TIA1,RPL22,ECE1,IDE,MTHFD1L,KHDRBS1,NLN,SOX4,CNOT1,PANK2,RRBP1,HNRNPR,NUP214,ZFP36,EIF2S3,MCCC2,PTCD3,MRPL35,EIF2S1,MTHFS,ASNSD1,NUP54,PPP3CA,SEC11A,APP,CERS2,EIF2B5,RPL7L1,IMPACT,LARP1,CNOT8,N6AMT1,SAMD8,MRPL17,NCK1,PINK1,GART,MRPS18C,POLR2H,ABCE1,LARP6,SMAD3,RPSA,STAT3,GSTM4,BTD,TMED10,PA2G4,TCEA2,RBM4B,EIF1AD,M…
1		0.507	300	680	31	0.046	0.103	GO:0000375	BP	3	RNA splicing, via transesterification reactions	10	GCFC2,PTBP1,SNRNP40,SART3,WBP11,KHSRP,HNRNPH3,NHP2L1,RBFOX2,POLR2C,HNRNPUL1,MAGOHB,PRPF4B,NCBP2,TIA1,WDR77,KHDRBS1,GTF2F1,HNRNPR,RBM17,TXNL4B,SRSF2,POLR2H,PSIP1,ZRSR2,RSRC1,CSTF3,SF3A3,SF3B3,ISY1,C7ORF55-LUC7L2
1		0.519	314	680	32	0.047	0.102	GO:0001882	MF	2	nucleoside binding	4	RALA,ADSS,LSG1,RAB7A,SEPHS1,ARFRP1,DRG2,EHD1,RAB35,RAB14,RAP2C,OARD1,EIF2S3,RRAS2,ARF1,ARL8A,DYNC1LI1,GNA12,PRPS1,AK3,GTPBP8,RAB8B,TSR1,RAB31,RAB3B,TUBB6,TUBB,ATL1,NUDT16,OPA1,NRAS,FPGT
1		0.529	725	680	60	0.088	0.083	GO:0016071	BP	3	mRNA metabolic process	8	GCFC2,PTBP1,SNRNP40,SART3,DIS3,WBP11,KHSRP,DNAJB11,HNRNPH3,CIRBP,NHP2L1,POLDIP3,RPL3,RBFOX2,RNMT,POLR2C,HNRNPUL1,MAGOHB,PRPF4B,NCBP2,TIA1,RPL22,WDR77,KHDRBS1,RBBP6,CNOT1,GTF2F1,PSMF1,HNRNPR,NUP214,ZFP36,SAFB2,EXOSC2,RBM17,CIR1,TXNL4B,APP,LARP1,CNOT8,CHTOP,SRSF2,POLR2H,PAPD4,PSIP1,RPSA,STAT3,ZRSR2,RBM4B,RSRC1,CSTF3,EDC3,CMTR2,SF3A3,YTHDF3,RPL14,SF3B3,NUDT16,TSEN15,ISY1,C7ORF55-LUC7L2
1		0.531	7142	680	415	0.61	0.058	GO:0043170	BP	3	macromolecule metabolic process	4	DPM1,NDUFAF7,HCCS,GCFC2,UBE3C,RNF216,PTBP1,UBR7,MAP4K5,SLC30A9,WWTR1,ZFP64,SERPINB1,UBR2,PHF20,KPNA6,FAS,BRD9,UBA6,GABARAPL2,METTL1,TDP1,DCUN1D1,MRPS10,DKK3,EIF2AK2,SNRNP40,MED29,NFYC,ATXN3,DDX3Y,SP100,MAPK6,FSTL3,RNF126,TCF3,MAP3K13,LMAN1,FOSL2,RAB7A,SART3,UBE2A,UBE2K,TULP3,MKNK1,STK17B,KCNK2,DIS3,WBP11,SEPHS1,HUWE1,KHSRP,NSFL1C,TASP1,TBX5,BRAP,DNAJB11,USP48,PPP2R3C,HNRNPH3,CIRBP,TRIOBP,NHP2L1,H…
1		0.56	385	680	37	0.054	0.096	GO:0008380	BP	3	RNA splicing	9	GCFC2,PTBP1,SNRNP40,SART3,WBP11,KHSRP,HNRNPH3,NHP2L1,RBFOX2,POLR2C,HNRNPUL1,MAGOHB,PRPF4B,CLK4,NCBP2,TIA1,WDR77,IVNS1ABP,KHDRBS1,GTF2F1,HNRNPR,RBM17,C2ORF49,CIR1,TXNL4B,SRSF2,POLR2H,PSIP1,ZRSR2,RBM4B,RSRC1,CSTF3,SF3A3,SF3B3,TSEN15,ISY1,C7ORF55-LUC7L2
1		0.579	947	680	74	0.109	0.078	GO:0044265	BP	3	cellular macromolecule catabolic process	5	RNF216,WWTR1,UBR2,UBA6,GABARAPL2,ATXN3,RNF126,RAB7A,UBE2A,UBE2K,DIS3,HUWE1,KHSRP,NSFL1C,USP48,CIRBP,RPL3,USP14,LONP2,KCTD10,MAGOHB,FAF2,NCBP2,PCYOX1,RPL22,UCHL5,VPS4B,IDE,RBBP6,RNF11,RNF114,USP22,CNOT1,PSMF1,RBCK1,HNRNPR,NUP214,ZFP36,DDA1,EXOSC2,RLIM,USP15,CCDC115,UGGT1,YME1L1,RNF121,RDX,FBXO11,BBS7,TMTC3,CSNK1D,RNF145,RMND5B,GNA12,USP12,LARP1,CNOT8,PINK1,AMFR,RCHY1,PAPD4,UBAP1,VCP,ARIH1,FBXO22,U…
1		0.606	303	680	31	0.046	0.102	GO:0032550	MF	2	purine ribonucleoside binding	6	RALA,ADSS,LSG1,RAB7A,SEPHS1,ARFRP1,DRG2,EHD1,RAB35,RAB14,RAP2C,EIF2S3,RRAS2,ARF1,ARL8A,DYNC1LI1,GNA12,PRPS1,AK3,GTPBP8,RAB8B,TSR1,RAB31,RAB3B,TUBB6,TUBB,ATL1,NUDT16,OPA1,NRAS,FPGT
1		0.67	716	680	59	0.087	0.082	GO:0043604	BP	3	amide biosynthetic process	6	MRPS10,EIF2AK2,DDX3Y,MKNK1,KHSRP,CIRBP,POLDIP3,RPL3,POLR2C,MTFMT,LARP4B,NCBP2,TIA1,RPL22,MTHFD1L,KHDRBS1,SOX4,CNOT1,RRBP1,HNRNPR,NUP214,ZFP36,EIF2S3,PTCD3,MRPL35,EIF2S1,MTHFS,ASNSD1,NUP54,PPP3CA,APP,CERS2,EIF2B5,RPL7L1,IMPACT,LARP1,CNOT8,N6AMT1,SAMD8,MRPL17,NCK1,PINK1,GART,MRPS18C,POLR2H,ABCE1,LARP6,SMAD3,RPSA,STAT3,PA2G4,TCEA2,RBM4B,EIF1AD,MRPS23,YTHDF3,RPL14,EIF1AY,DDX3X
1		0.688	238	680	26	0.038	0.109	GO:0003924	MF	2	GTPase activity	8	RALA,LSG1,GNB5,RAB7A,GNB1,ARFRP1,RAB35,RAB14,RAP2C,TBCC,EIF2S3,RRAS2,ARF1,ARL8A,GNA12,GTPBP8,RAB8B,TSR1,RAB31,RAB3B,TUBB6,TUBB,ATL1,OPA1,NRAS,DDX3X
1		0.764	307	680	31	0.046	0.101	GO:0032549	MF	2	ribonucleoside binding	5	RALA,ADSS,LSG1,RAB7A,SEPHS1,ARFRP1,DRG2,EHD1,RAB35,RAB14,RAP2C,EIF2S3,RRAS2,ARF1,ARL8A,DYNC1LI1,GNA12,PRPS1,AK3,GTPBP8,RAB8B,TSR1,RAB31,RAB3B,TUBB6,TUBB,ATL1,NUDT16,OPA1,NRAS,FPGT
1		0.842	769	680	62	0.091	0.081	GO:0006518	BP	3	peptide metabolic process	6	MRPS10,EIF2AK2,DDX3Y,MKNK1,KHSRP,CIRBP,POLDIP3,RPL3,POLR2C,MTFMT,LARP4B,LTA4H,NCBP2,TIA1,RPL22,ECE1,IDE,KHDRBS1,NLN,SOX4,CNOT1,RRBP1,HNRNPR,NUP214,ZFP36,EIF2S3,PTCD3,MRPL35,EIF2S1,NUP54,PPP3CA,SEC11A,APP,EIF2B5,RPL7L1,IMPACT,LARP1,CNOT8,N6AMT1,MRPL17,NCK1,PINK1,MRPS18C,POLR2H,ABCE1,LARP6,SMAD3,RPSA,STAT3,GSTM4,TMED10,PA2G4,TCEA2,RBM4B,EIF1AD,MRPS23,BACE2,YTHDF3,BACE1,RPL14,EIF1AY,DDX3X
1		0.938	106	680	15	0.022	0.142	GO:0007034	BP	3	vacuolar transport	5	AP3D1,RAB7A,TMEM106B,VPS4B,NDFIP1,SCARB2,VPS33A,ARF1,PINK1,HGSNAT,VCP,AP1G1,UBXN6,TRAK1,AP3M1
1		0.942	633	680	53	0.078	0.084	GO:0006412	BP	3	translation	8	MRPS10,EIF2AK2,DDX3Y,MKNK1,KHSRP,CIRBP,POLDIP3,RPL3,POLR2C,MTFMT,LARP4B,NCBP2,TIA1,RPL22,KHDRBS1,SOX4,CNOT1,RRBP1,HNRNPR,NUP214,ZFP36,EIF2S3,PTCD3,MRPL35,EIF2S1,NUP54,PPP3CA,APP,EIF2B5,RPL7L1,IMPACT,LARP1,CNOT8,N6AMT1,MRPL17,NCK1,PINK1,MRPS18C,POLR2H,ABCE1,LARP6,SMAD3,RPSA,STAT3,PA2G4,TCEA2,RBM4B,EIF1AD,MRPS23,YTHDF3,RPL14,EIF1AY,DDX3X
1		0.944	7693	680	441	0.649	0.057	GO:0006807	BP	3	nitrogen compound metabolic process	3	DPM1,NDUFAF7,SLC25A13,HCCS,GCFC2,COX10,UBE3C,RNF216,PTBP1,UBR7,MAP4K5,SLC30A9,COX15,WWTR1,ZFP64,SERPINB1,UBR2,PHF20,KPNA6,FAS,BRD9,UBA6,GABARAPL2,ADSS,METTL1,TDP1,DCUN1D1,MRPS10,DKK3,EIF2AK2,SNRNP40,MED29,NFYC,ATXN3,DDX3Y,SP100,MAPK6,FSTL3,RNF126,TCF3,MAP3K13,LMAN1,FOSL2,RAB7A,SART3,UBE2A,UBE2K,TULP3,MKNK1,STK17B,KCNK2,DIS3,WBP11,SEPHS1,HUWE1,KHSRP,NSFL1C,TASP1,TBX5,BRAP,DNAJB11,USP48,PPP2R3C,CRA…
1		0.947	297	680	30	0.044	0.101	GO:0000377	BP	3	RNA splicing, via transesterification reactions with bulged adenosine as nucleophile	11	GCFC2,PTBP1,SNRNP40,SART3,WBP11,HNRNPH3,NHP2L1,RBFOX2,POLR2C,HNRNPUL1,MAGOHB,PRPF4B,NCBP2,TIA1,WDR77,KHDRBS1,GTF2F1,HNRNPR,RBM17,TXNL4B,SRSF2,POLR2H,PSIP1,ZRSR2,RSRC1,CSTF3,SF3A3,SF3B3,ISY1,C7ORF55-LUC7L2
1		0.947	297	680	30	0.044	0.101	GO:0000398	BP	3	mRNA splicing, via spliceosome	10	GCFC2,PTBP1,SNRNP40,SART3,WBP11,HNRNPH3,NHP2L1,RBFOX2,POLR2C,HNRNPUL1,MAGOHB,PRPF4B,NCBP2,TIA1,WDR77,KHDRBS1,GTF2F1,HNRNPR,RBM17,TXNL4B,SRSF2,POLR2H,PSIP1,ZRSR2,RSRC1,CSTF3,SF3A3,SF3B3,ISY1,C7ORF55-LUC7L2
1		0.958	311	680	31	0.046	0.1	GO:0032561	MF	2	guanyl ribonucleotide binding	8	RALA,ADSS,LSG1,RAB7A,SEPHS1,ARFRP1,DRG2,EHD1,RAB35,RAB14,RAP2C,EIF2S3,RRAS2,ARF1,ARL8A,DYNC1LI1,GNA12,PRPS1,AK3,GTPBP8,RAB8B,TSR1,RAB31,RAB3B,TUBB6,TUBB,ATL1,NUDT16,OPA1,NRAS,FPGT
1		1	12046	680	632	0.929	0.052	GO:0008150	BP	3	biological_process	1	DPM1,NDUFAF7,SLC25A13,HCCS,CIAPIN1,GCFC2,RALA,IFRD1,COX10,SYPL1,UBE3C,METTL13,RNF216,PTBP1,ANLN,UBR7,MAP4K5,SLC30A9,COX15,WWTR1,ZFP64,SERPINB1,UBR2,PHF20,KPNA6,FAS,BRD9,ABCF2,UBA6,GABARAPL2,ADSS,TBC1D23,METTL1,PI4K2B,LSG1,TDP1,DCUN1D1,MAP4,MRPS10,ELN,DKK3,TRAPPC3,EIF2AK2,SLC2A3,SNRNP40,MED29,AP3D1,ZC3H15,NFYC,ATXN3,EML1,DDX3Y,SP100,MAPK6,GNB5,EXOC5,FSTL3,RNF126,TCF3,MAP3K13,LMAN1,TIMM21,FOSL2,RAB…
1		1	9	680	1	0.001	0.111	GO:0044848	BP	3	biological phase	2	WNT5A
1		1	7	680	1	0.001	0.143	GO:0044851	BP	3	hair cycle phase	3	WNT5A
1		1	11115	680	596	0.876	0.054	GO:0009987	BP	3	cellular process	2	DPM1,NDUFAF7,SLC25A13,HCCS,CIAPIN1,GCFC2,RALA,IFRD1,COX10,SYPL1,UBE3C,RNF216,PTBP1,ANLN,UBR7,MAP4K5,SLC30A9,COX15,WWTR1,ZFP64,SERPINB1,UBR2,PHF20,KPNA6,FAS,BRD9,UBA6,GABARAPL2,ADSS,METTL1,PI4K2B,TDP1,DCUN1D1,MAP4,MRPS10,ELN,DKK3,TRAPPC3,EIF2AK2,SLC2A3,SNRNP40,MED29,AP3D1,ZC3H15,NFYC,ATXN3,EML1,DDX3Y,SP100,MAPK6,GNB5,EXOC5,FSTL3,RNF126,TCF3,MAP3K13,LMAN1,TIMM21,FOSL2,RAB7A,SART3,UBE2A,UBE2K,TULP3,…
1		1	11	680	1	0.001	0.091	GO:0032196	BP	3	transposition	3	APOBEC3C
1		1	427	680	23	0.034	0.054	GO:0061919	BP	3	process utilizing autophagic mechanism	3	GABARAPL2,RAB7A,WBP11,NSFL1C,SNX5,TBC1D17,STAM2,VPS4B,VPS26A,VPS33A,MCL1,ATP6V1B2,VPS26B,LARP1,PINK1,VCP,UBXN6,ATG13,EXOC7,NBR1,PSAP,DYNLL2,LIX1L
1		1	552	680	26	0.038	0.047	GO:0030029	BP	3	actin filament-based process	3	RALA,ELN,ATXN3,TRIOBP,MYH9,PRKAR1A,DPYSL3,OBSL1,SDC4,MKLN1,MYO1B,PDGFRA,RDX,ACTR2,RAP1GDS1,FRMD6,ARF1,ARHGAP18,CDC42EP2,NCK1,STC1,SMAD3,ANTXR1,GMFB,TRIM27,EMP2
1		1	7	680	1	0.001	0.143	GO:0051014	BP	3	actin filament severing	4	MYH9
1		1	83	680	3	0.004	0.036	GO:0008037	BP	3	cell recognition	3	APP,UBAP2L,DYNLL2
1		1	38	680	1	0.001	0.026	GO:0009988	BP	3	cell-cell recognition	4	UBAP2L
1		1	205	680	16	0.024	0.078	GO:0006457	BP	3	protein folding	3	NFYC,GNB5,LMAN1,GNB1,DNAJB11,PPIF,NKTR,SIL1,TBCC,EMC1,UGGT1,PDCL,AMFR,VCP,TMX3,PDIA3
1		1	23	680	1	0.001	0.043	GO:0042026	BP	3	protein refolding	4	PDCL
1		1	4	680	1	0.001	0.25	GO:0007023	BP	3	post-chaperonin tubulin folding pathway	4	TBCC
1		1	33	680	1	0.001	0.03	GO:0006458	BP	3	'de novo' protein folding	4	UGGT1
1		1	17	680	1	0.001	0.059	GO:0051084	BP	3	'de novo' posttranslational protein folding	5	UGGT1
1		1	12	680	2	0.003	0.167	GO:0034975	BP	3	protein folding in endoplasmic reticulum	4	EMC1,PDIA3
1		1	564	680	37	0.054	0.066	GO:0007017	BP	3	microtubule-based process	3	MAP4,AP3D1,ATXN3,EML1,PPP2R3C,MYH9,CHD4,DOCK7,SSX2IP,VPS4B,GPSM2,OBSL1,MACF1,FOPNL,NAV1,DYNC2LI1,ACTR2,CSNK1D,APP,PEX14,DYNC1LI1,CHEK1,CETN3,LMNA,PEX13,SUN1,CHD3,TUBB6,AP3S1,RCC1,TRAK1,AP3M1,BLOC1S2,TUBB,OPA1,FGFR1OP,DYNLL2
1		1	156	680	10	0.015	0.064	GO:0022406	BP	3	membrane docking	3	EXOC5,RAB7A,CEP41,YKT6,TCTN3,VPS33A,CSNK1D,RAB8B,TUBB,FGFR1OP
1		1	4	680	1	0.001	0.25	GO:0022615	BP	3	protein to membrane docking	4	RAB7A
1		1	1536	680	93	0.137	0.061	GO:0007049	BP	3	cell cycle	3	RALA,ANLN,UBR2,MAP4,EML1,MAPK6,TRIOBP,MYH9,VRK1,NBN,AKAP8,CEP41,RAD51C,DUSP3,PRKAR1A,CHD4,RAB35,CCNC,PTP4A1,RAD1,WNT5A,TUSC2,STK25,ID2,ATF2,SSX2IP,STAG1,VPS4B,KHDRBS1,GPSM2,ZWINT,OBSL1,USP22,SOX4,CNOT1,PSMF1,NUP214,MAU2,SNX9,THAP1,GPS2,NOTCH2,TBX3,ORC3,RDX,ACTR2,NUP54,PPP3CA,PHLDA1,TXNL4B,CSNK1D,BRD4,APP,ITGB3BP,INTS7,ARF1,ARL8A,DYNC1LI1,CCNA2,HDAC8,CHEK1,CETN3,ING1,CNOT8,LMNA,SRSF2,LEMD2,PEA15,A…
1		1	883	680	54	0.079	0.061	GO:0000278	BP	3	mitotic cell cycle	4	ANLN,MAP4,EML1,VRK1,NBN,AKAP8,CEP41,RAD51C,DUSP3,STK25,ID2,ATF2,VPS4B,KHDRBS1,GPSM2,ZWINT,OBSL1,USP22,SOX4,CNOT1,PSMF1,NUP214,MAU2,SNX9,THAP1,ORC3,RDX,NUP54,PPP3CA,PHLDA1,CSNK1D,BRD4,APP,ARF1,DYNC1LI1,CCNA2,CHEK1,CNOT8,LMNA,SRSF2,AZI2,REEP3,BRD7,SMAD3,CTDSP2,CTDNEP1,ANKLE2,PTPN11,RCC1,TUBB,ZNF830,CENPW,FGFR1OP,DDX3X
1		1	1	680	1	0.001	1	GO:0033277	BP	3	abortive mitotic cell cycle	5	PTPN11
1		1	1618	680	72	0.106	0.044	GO:0008219	BP	3	cell death	3	CIAPIN1,RNF216,FAS,EIF2AK2,SP100,FOSL2,UBE2K,GNB1,STK17B,KCNK2,TBX5,DNAJC5,NBN,KDELR1,PPIF,OGG1,WNT5A,STK25,ATF2,TIA1,IVNS1ABP,VPS4B,TCTN3,SOX4,RBCK1,RTN3,RRAS2,EIF2S1,NOTCH2,RFK,TBX3,NMT1,YME1L1,XPA,PPP2R1B,APH1B,PHLDA1,APP,ITGB3BP,MCL1,ANP32E,PARP1,EIF2B5,OGT,EBAG9,CHEK1,TMEM123,ING1,IMPACT,KCNMA1,NCK1,PINK1,LMNA,PEA15,CITED2,VCP,SMAD3,PDIA3,STAT3,PRELID1,PA2G4,JUNB,ANKLE2,COL18A1,BLOC1S2,HDAC2…
1		1	44	680	4	0.006	0.091	GO:0070265	BP	3	necrotic cell death	4	FAS,PPIF,RBCK1,TMEM123
1		1	258	680	10	0.015	0.039	GO:0070997	BP	3	neuron death	4	FAS,DNAJC5,ATF2,RRAS2,EIF2S1,APP,MCL1,PARP1,PINK1,STAT3
1		1	1517	680	62	0.091	0.041	GO:0012501	BP	3	programmed cell death	4	CIAPIN1,RNF216,FAS,EIF2AK2,SP100,UBE2K,GNB1,STK17B,TBX5,DNAJC5,NBN,KDELR1,PPIF,OGG1,WNT5A,STK25,ATF2,TIA1,IVNS1ABP,TCTN3,SOX4,RBCK1,RTN3,EIF2S1,NOTCH2,RFK,TBX3,NMT1,YME1L1,XPA,PPP2R1B,APH1B,PHLDA1,APP,ITGB3BP,MCL1,ANP32E,PARP1,EIF2B5,OGT,EBAG9,CHEK1,KCNMA1,NCK1,PINK1,LMNA,PEA15,CITED2,VCP,SMAD3,PDIA3,STAT3,PRELID1,PA2G4,ANKLE2,COL18A1,BLOC1S2,HDAC2,ZNF830,OPA1,DDX3X,DYNLL2
1		1	1467	680	62	0.091	0.042	GO:0006915	BP	3	apoptotic process	5	CIAPIN1,RNF216,FAS,EIF2AK2,SP100,UBE2K,GNB1,STK17B,TBX5,DNAJC5,NBN,KDELR1,PPIF,OGG1,WNT5A,STK25,ATF2,TIA1,IVNS1ABP,TCTN3,SOX4,RBCK1,RTN3,EIF2S1,NOTCH2,RFK,TBX3,NMT1,YME1L1,XPA,PPP2R1B,APH1B,PHLDA1,APP,ITGB3BP,MCL1,ANP32E,PARP1,EIF2B5,OGT,EBAG9,CHEK1,KCNMA1,NCK1,PINK1,LMNA,PEA15,CITED2,VCP,SMAD3,PDIA3,STAT3,PRELID1,PA2G4,ANKLE2,COL18A1,BLOC1S2,HDAC2,ZNF830,OPA1,DDX3X,DYNLL2
1		1	68	680	4	0.006	0.059	GO:1904019	BP	3	epithelial cell apoptotic process	6	FAS,TIA1,EIF2S1,COL18A1
1		1	8	680	1	0.001	0.125	GO:0097050	BP	3	type B pancreatic cell apoptotic process	7	EIF2S1
1		1	12	680	1	0.001	0.083	GO:0097284	BP	3	hepatocyte apoptotic process	7	FAS
1		1	33	680	1	0.001	0.03	GO:0072577	BP	3	endothelial cell apoptotic process	7	COL18A1
1		1	71	680	4	0.006	0.056	GO:0071887	BP	3	leukocyte apoptotic process	6	FAS,KDELR1,WNT5A,PRELID1
1		1	49	680	4	0.006	0.082	GO:0070227	BP	3	lymphocyte apoptotic process	7	FAS,KDELR1,WNT5A,PRELID1
1		1	34	680	4	0.006	0.118	GO:0070231	BP	3	T cell apoptotic process	8	FAS,KDELR1,WNT5A,PRELID1
1		1	16	680	1	0.001	0.062	GO:0070242	BP	3	thymocyte apoptotic process	9	WNT5A
1		1	49	680	1	0.001	0.02	GO:0010657	BP	3	muscle cell apoptotic process	6	GNB1
1		1	32	680	1	0.001	0.031	GO:0010658	BP	3	striated muscle cell apoptotic process	7	GNB1
1		1	30	680	1	0.001	0.033	GO:0010659	BP	3	cardiac muscle cell apoptotic process	8	GNB1
1		1	29	680	1	0.001	0.034	GO:0043276	BP	3	anoikis	6	MCL1
1		1	13	680	1	0.001	0.077	GO:0006925	BP	3	inflammatory cell apoptotic process	6	FAS
1		1	16	680	1	0.001	0.062	GO:0044346	BP	3	fibroblast apoptotic process	6	STK17B
1		1	182	680	7	0.01	0.038	GO:0051402	BP	3	neuron apoptotic process	6	FAS,DNAJC5,ATF2,APP,MCL1,PARP1,PINK1
1		1	6	680	1	0.001	0.167	GO:0097049	BP	3	motor neuron apoptotic process	7	FAS
1		1	37	680	3	0.004	0.081	GO:0097300	BP	3	programmed necrotic cell death	5	FAS,PPIF,RBCK1
1		1	33	680	3	0.004	0.091	GO:0070266	BP	3	necroptotic process	6	FAS,PPIF,RBCK1
1		1	1422	680	69	0.101	0.049	GO:0006928	BP	3	movement of cell or subcellular component	3	ANLN,MAP4,AP3D1,SP100,TBX5,RBFOX2,MYH9,DOK5,COL1A1,PTP4A1,LAMA4,DPYSL3,WNT5A,IL1R1,SDC1,DOCK7,SSX2IP,GLIPR2,RECK,RAP2C,SDC4,MACF1,MYO1B,PTPRA,RRAS2,NAV1,PDGFRA,LAMC1,RDX,DYNC2LI1,ACTR2,FRMD6,IQGAP1,APP,PEX14,CERS2,DYNC1LI1,ARHGAP18,GNA12,MMP14,NCK1,STC1,AMFR,LMNA,DDR2,PEX13,CITED2,SUN1,AMOTL1,SMAD3,STAT3,AP3S1,PTPN11,C5ORF30,EXT1,TRAK1,COL18A1,CCBE1,AP3M1,BLOC1S2,TUBB,CD47,DPP4,OPA1,FGFR1OP,NRAS,…
1		1	219	680	15	0.022	0.068	GO:0007018	BP	3	microtubule-based movement	4	MAP4,AP3D1,SSX2IP,DYNC2LI1,ACTR2,APP,PEX14,DYNC1LI1,SUN1,AP3S1,TRAK1,AP3M1,BLOC1S2,OPA1,DYNLL2
1		1	2	680	1	0.001	0.5	GO:0051012	BP	3	microtubule sliding	5	MAP4
1		1	97	680	5	0.007	0.052	GO:0030048	BP	3	actin filament-based movement	4	MYH9,MYO1B,FRMD6,STC1,EMP2
1		1	80	680	3	0.004	0.037	GO:0070252	BP	3	actin-mediated cell contraction	5	FRMD6,STC1,EMP2
1		1	27	680	1	0.001	0.037	GO:0045103	BP	3	intermediate filament-based process	3	ATXN3
1		1	4306	680	203	0.299	0.047	GO:0007154	BP	3	cell communication	3	RALA,SYPL1,PTBP1,MAP4K5,WWTR1,UBR2,PHF20,FAS,GABARAPL2,DKK3,EIF2AK2,ZC3H15,ATXN3,SP100,MAPK6,GNB5,FSTL3,RNF126,MAP3K13,RAB7A,UBE2K,TULP3,GNB1,MKNK1,STK17B,KCNK2,OXCT1,ANKRD10,TBX5,BRAP,DNAJB11,RBFOX2,MYH9,NDRG3,DOK5,DNAJC5,ARFRP1,SAMHD1,USP14,POLR2C,NBN,VRK3,AKAP8,NAMPT,TLE4,PPP3CB,PPIF,DRG2,COL1A1,DUSP3,PRKAR1A,LIN7A,CHD4,PAK1IP1,RAD1,WNT5A,TUSC2,NCBP2,SNX4,MAPKAPK3,STAM2,IL1R1,STK25,SDC1,TIA1,D…
1		1	144	680	10	0.015	0.069	GO:0007163	BP	3	establishment or maintenance of cell polarity	3	MAP4,MYH9,LIN7A,WNT5A,STK25,DOCK7,GPSM2,ACTR2,LMNA,AMOTL1
1		1	28	680	2	0.003	0.071	GO:0061245	BP	3	establishment or maintenance of bipolar cell polarity	4	LIN7A,WNT5A
1		1	28	680	2	0.003	0.071	GO:0035088	BP	3	establishment or maintenance of apical/basal cell polarity	5	LIN7A,WNT5A
1		1	23	680	2	0.003	0.087	GO:0045197	BP	3	establishment or maintenance of epithelial cell apical/basal polarity	6	LIN7A,WNT5A
1		1	13	680	1	0.001	0.077	GO:0030011	BP	3	maintenance of cell polarity	4	LIN7A
1		1	9	680	1	0.001	0.111	GO:0035090	BP	3	maintenance of apical/basal cell polarity	5	LIN7A
1		1	9	680	1	0.001	0.111	GO:0045199	BP	3	maintenance of epithelial cell apical/basal polarity	6	LIN7A
1		1	11	680	1	0.001	0.091	GO:0061339	BP	3	establishment or maintenance of monopolar cell polarity	4	WNT5A
1		1	96	680	6	0.009	0.062	GO:0030010	BP	3	establishment of cell polarity	4	MAP4,MYH9,WNT5A,DOCK7,GPSM2,AMOTL1
1		1	20	680	1	0.001	0.05	GO:0090162	BP	3	establishment of epithelial cell polarity	5	WNT5A
1		1	11	680	1	0.001	0.091	GO:0061162	BP	3	establishment of monopolar cell polarity	5	WNT5A
1		1	9	680	1	0.001	0.111	GO:0035089	BP	3	establishment of apical/basal cell polarity	6	WNT5A
1		1	1108	680	68	0.1	0.061	GO:0022402	BP	3	cell cycle process	3	RALA,ANLN,UBR2,MAP4,EML1,MYH9,VRK1,NBN,AKAP8,CEP41,RAD51C,PRKAR1A,CHD4,RAB35,RAD1,WNT5A,ID2,ATF2,SSX2IP,STAG1,VPS4B,KHDRBS1,GPSM2,ZWINT,OBSL1,SOX4,CNOT1,PSMF1,NUP214,MAU2,SNX9,NOTCH2,ORC3,RDX,ACTR2,NUP54,PPP3CA,PHLDA1,CSNK1D,BRD4,APP,ITGB3BP,ARF1,DYNC1LI1,CCNA2,HDAC8,CHEK1,CETN3,CNOT8,LMNA,LEMD2,SUN1,REEP3,BRD7,SMAD3,CHD3,PA2G4,CTDSP2,CTDNEP1,ANKLE2,RCC1,PPP1CC,TUBB,NUDT16,ZNF830,FGFR1OP,DDX3X,DY…
1		1	524	680	29	0.043	0.055	GO:0044770	BP	3	cell cycle phase transition	4	ANLN,NBN,AKAP8,CEP41,RAD51C,ID2,VPS4B,KHDRBS1,SOX4,CNOT1,PSMF1,ORC3,RDX,PPP3CA,PHLDA1,CSNK1D,BRD4,APP,DYNC1LI1,CCNA2,CHEK1,CNOT8,BRD7,CTDSP2,RCC1,TUBB,ZNF830,FGFR1OP,DDX3X
1		1	243	680	16	0.024	0.066	GO:0044839	BP	3	cell cycle G2/M phase transition	5	NBN,AKAP8,CEP41,RAD51C,VPS4B,KHDRBS1,PSMF1,PHLDA1,CSNK1D,BRD4,APP,CCNA2,CHEK1,TUBB,ZNF830,FGFR1OP
1		1	237	680	13	0.019	0.055	GO:0044843	BP	3	cell cycle G1/S phase transition	5	ID2,SOX4,CNOT1,ORC3,RDX,PPP3CA,BRD4,CCNA2,CNOT8,BRD7,CTDSP2,RCC1,DDX3X
1		1	736	680	45	0.066	0.061	GO:1903047	BP	3	mitotic cell cycle process	4	ANLN,MAP4,EML1,VRK1,NBN,AKAP8,CEP41,RAD51C,ID2,ATF2,VPS4B,KHDRBS1,GPSM2,ZWINT,OBSL1,SOX4,CNOT1,PSMF1,NUP214,MAU2,SNX9,ORC3,RDX,NUP54,PPP3CA,PHLDA1,CSNK1D,BRD4,APP,ARF1,DYNC1LI1,CCNA2,CHEK1,CNOT8,LMNA,REEP3,BRD7,CTDSP2,CTDNEP1,ANKLE2,RCC1,TUBB,ZNF830,FGFR1OP,DDX3X
1		1	501	680	28	0.041	0.056	GO:0044772	BP	3	mitotic cell cycle phase transition	5	ANLN,NBN,CEP41,RAD51C,ID2,VPS4B,KHDRBS1,SOX4,CNOT1,PSMF1,ORC3,RDX,PPP3CA,PHLDA1,CSNK1D,BRD4,APP,DYNC1LI1,CCNA2,CHEK1,CNOT8,BRD7,CTDSP2,RCC1,TUBB,ZNF830,FGFR1OP,DDX3X
1		1	235	680	15	0.022	0.064	GO:0000086	BP	3	G2/M transition of mitotic cell cycle	6	NBN,CEP41,RAD51C,VPS4B,KHDRBS1,PSMF1,PHLDA1,CSNK1D,BRD4,APP,CCNA2,CHEK1,TUBB,ZNF830,FGFR1OP
1		1	224	680	12	0.018	0.054	GO:0000082	BP	3	G1/S transition of mitotic cell cycle	6	ID2,SOX4,CNOT1,ORC3,RDX,PPP3CA,BRD4,CNOT8,BRD7,CTDSP2,RCC1,DDX3X
1		1	502	680	30	0.044	0.06	GO:0051301	BP	3	cell division	3	RALA,ANLN,WWTR1,MAP4,TRIOBP,MYH9,VRK1,RAB35,DOCK7,STAG1,VPS4B,GPSM2,ZWINT,MAU2,SNX9,ACTR2,ITGB3BP,ARF1,ARL8A,DYNC1LI1,CCNA2,CETN3,REEP3,ANKLE2,RCC1,PPP1CC,TUBB,ZNF830,CENPW,ETV5
1		1	29	680	3	0.004	0.103	GO:0017145	BP	3	stem cell division	4	WWTR1,DOCK7,ETV5
1		1	18	680	1	0.001	0.056	GO:0048103	BP	3	somatic stem cell division	5	DOCK7
1		1	10	680	1	0.001	0.1	GO:0036445	BP	3	neuronal stem cell division	6	DOCK7
1		1	14	680	3	0.004	0.214	GO:0008356	BP	3	asymmetric cell division	4	DOCK7,ACTR2,ETV5
1		1	6	680	2	0.003	0.333	GO:0098722	BP	3	asymmetric stem cell division	5	DOCK7,ETV5
1		1	117	680	7	0.01	0.06	GO:0000910	BP	3	cytokinesis	4	RALA,ANLN,MYH9,RAB35,SNX9,ACTR2,ARF1
1		1	20	680	3	0.004	0.15	GO:0032506	BP	3	cytokinetic process	5	MYH9,SNX9,ARF1
1		1	48	680	4	0.006	0.083	GO:0061640	BP	3	cytoskeleton-dependent cytokinesis	5	ANLN,SNX9,ACTR2,ARF1
1		1	40	680	3	0.004	0.075	GO:0000281	BP	3	mitotic cytokinesis	6	ANLN,SNX9,ARF1
1		1	6	680	1	0.001	0.167	GO:1902410	BP	3	mitotic cytokinetic process	7	ARF1
1		1	949	680	62	0.091	0.065	GO:0001775	BP	3	cell activation	3	SERPINB1,FAS,SLC2A3,AP3D1,TCF3,RAB7A,GNB1,HUWE1,PPP2R3C,MYH9,DNAJC5,NBN,KDELR1,PPP3CB,COL1A1,DUSP3,PRKAR1A,LTA4H,FAF2,ARMC8,WNT5A,TUSC2,SNX4,RAB14,RAP2C,SDC4,SOX4,TWSG1,SLC44A2,NDFIP1,NOTCH2,PDGFRA,GNS,ACTR2,PPP3CA,IQGAP1,APP,C1ORF35,ARL8A,DYNC1LI1,GNA12,STOM,MMP14,NCK1,PDXK,AZI2,HGSNAT,VCP,AP1G1,SMAD3,RAB31,STAT3,PRELID1,PA2G4,SOCS6,PTPN11,TUBB,CD47,DPP4,PSAP,NRAS,DDX3X
1		1	16	680	1	0.001	0.062	GO:0061900	BP	3	glial cell activation	4	APP
1		1	303	680	19	0.028	0.063	GO:0007059	BP	3	chromosome segregation	3	DDX3Y,AKAP8,RAD51C,STAG1,VPS4B,ZWINT,MAU2,ACTR2,ITGB3BP,ARL8A,DYNC1LI1,HDAC8,LEMD2,SUN1,RCC1,PPP1CC,CENPW,DDX3X,DYNLL2
1		1	260	680	14	0.021	0.054	GO:0098813	BP	3	nuclear chromosome segregation	4	AKAP8,RAD51C,STAG1,VPS4B,ZWINT,MAU2,ACTR2,ITGB3BP,DYNC1LI1,HDAC8,LEMD2,SUN1,PPP1CC,DYNLL2
1		1	64	680	1	0.001	0.016	GO:0051304	BP	3	chromosome separation	4	DYNC1LI1
1		1	17	680	1	0.001	0.059	GO:0000920	BP	3	cell separation after cytokinesis	3	VPS4B
1		1	73	680	1	0.001	0.014	GO:0097194	BP	3	execution phase of apoptosis	3	TBX5
1		1	1213	680	58	0.085	0.048	GO:0040011	BP	3	locomotion	2	RALA,ANLN,SP100,RAB7A,TBX5,RBFOX2,MYH9,DOK5,USP14,PPP3CB,COL1A1,PTP4A1,LAMA4,DPYSL3,WNT5A,IL1R1,SDC1,DOCK7,SSX2IP,VPS4B,GLIPR2,RECK,RAP2C,SDC4,MACF1,PTPRA,RRAS2,NAV1,PDGFRA,LAMC1,RDX,IQGAP1,APP,CERS2,ARHGAP18,GNA12,MMP14,NCK1,STC1,LMNA,DDR2,PEX13,CITED2,SUN1,AMOTL1,SMAD3,STAT3,PTPN11,C5ORF30,EXT1,COL18A1,CCBE1,CD47,DPP4,FGFR1OP,NRAS,SYNJ2BP,EMP2
1		1	5029	680	292	0.429	0.058	GO:0071840	BP	3	cellular component organization or biogenesis	2	NDUFAF7,HCCS,CIAPIN1,GCFC2,RALA,IFRD1,COX10,ANLN,COX15,WWTR1,UBR2,PHF20,FAS,BRD9,UBA6,GABARAPL2,PI4K2B,LSG1,MAP4,MRPS10,ELN,TRAPPC3,EIF2AK2,AP3D1,ATXN3,EML1,SP100,MAPK6,LMAN1,TIMM21,RAB7A,SART3,UBE2A,UBE2K,GNB1,DIS3,WBP11,HUWE1,NSFL1C,SNX5,PPP2R3C,SEC22C,CIRBP,TRIOBP,NHP2L1,HSCB,RPL3,RBFOX2,MYH9,VRK1,BRMS1L,NDRG3,DOK5,TM9SF4,SAMHD1,SMARCA1,UBL4A,LONP2,NBN,TBC1D17,VRK3,AKAP8,BET1,TMEM106B,CEP41,YK…
1		1	2510	680	159	0.234	0.063	GO:0044085	BP	3	cellular component biogenesis	3	NDUFAF7,HCCS,CIAPIN1,GCFC2,RALA,COX10,ANLN,COX15,WWTR1,FAS,GABARAPL2,LSG1,MAP4,ELN,TRAPPC3,EIF2AK2,LMAN1,TIMM21,RAB7A,SART3,UBE2K,GNB1,DIS3,WBP11,NSFL1C,CIRBP,TRIOBP,NHP2L1,HSCB,RPL3,TM9SF4,SAMHD1,NBN,BET1,CEP41,TLE4,GLRX3,RAD51C,COL1A1,PRKAR1A,EHD1,KCTD10,LIN7A,KRR1,CHD4,PAK1IP1,DPYSL3,WNT5A,STAM2,STK25,SDC1,PNO1,RPL22,WDR77,SSX2IP,VPS4B,IDE,TCTN3,TAF12,KHDRBS1,GPSM2,NDUFAF4,OBSL1,SDC4,TBCC,CNOT…
1		1	1155	680	76	0.112	0.066	GO:0070271	BP	3	protein complex biogenesis	4	NDUFAF7,HCCS,COX10,ANLN,COX15,FAS,ELN,TRAPPC3,EIF2AK2,LMAN1,TIMM21,UBE2K,GNB1,TRIOBP,HSCB,TM9SF4,SAMHD1,BET1,TLE4,COL1A1,EHD1,KCTD10,LIN7A,DPYSL3,IDE,KHDRBS1,NDUFAF4,OBSL1,TBCC,SNX9,MCCC2,GLUL,LAMC1,YME1L1,XPA,PDCL,RDX,ACTR2,RAP1GDS1,NUP54,CSNK1D,PEX14,ARF1,PARP1,ARHGAP18,STOM,CDC42EP2,IMPACT,NCK1,PINK1,AMFR,VMA21,NDUFV3,HGSNAT,VCP,SMAD3,SRR,TMED10,HSPA4,TMEM126B,PDE4DIP,CTNNBIP1,PTPN11,RCC1,COA4…
1		1	15	680	3	0.004	0.2	GO:0097034	BP	3	mitochondrial respiratory chain complex IV biogenesis	5	TIMM21,COA4,COA5
1		1	56	680	6	0.009	0.107	GO:0097031	BP	3	mitochondrial respiratory chain complex I biogenesis	5	NDUFAF7,TIMM21,NDUFAF4,NDUFV3,TMEM126B,NDUFA6
1		1	19	680	4	0.006	0.211	GO:0097734	BP	3	extracellular exosome biogenesis	4	RAB7A,SDC1,VPS4B,SDC4
1		1	440	680	35	0.051	0.08	GO:0022613	BP	3	ribonucleoprotein complex biogenesis	4	GCFC2,LSG1,SART3,DIS3,WBP11,CIRBP,NHP2L1,RPL3,KRR1,PAK1IP1,PNO1,RPL22,WDR77,CNOT1,EXOSC2,DHX30,UTP3,G3BP2,TXNL4B,CSNK1D,RPL7L1,ABCE1,PSIP1,TSR1,RPSA,ZRSR2,PA2G4,EDC3,SF3A3,RPL14,RRP7A,NUDT16,DDX3X,ISY1,C7ORF55-LUC7L2
1		1	304	680	22	0.032	0.072	GO:0042254	BP	3	ribosome biogenesis	5	LSG1,DIS3,WBP11,NHP2L1,RPL3,KRR1,PAK1IP1,PNO1,RPL22,EXOSC2,DHX30,UTP3,CSNK1D,RPL7L1,ABCE1,TSR1,RPSA,PA2G4,RPL14,RRP7A,NUDT16,DDX3X
1		1	66	680	6	0.009	0.091	GO:0042273	BP	3	ribosomal large subunit biogenesis	5	NHP2L1,RPL3,PAK1IP1,DHX30,RPL7L1,RPL14
1		1	66	680	6	0.009	0.091	GO:0042274	BP	3	ribosomal small subunit biogenesis	5	NHP2L1,KRR1,UTP3,TSR1,RPSA,RRP7A
1		1	31	680	1	0.001	0.032	GO:0044091	BP	3	membrane biogenesis	4	EMP2
1		1	4828	680	281	0.413	0.058	GO:0016043	BP	3	cellular component organization	3	NDUFAF7,HCCS,CIAPIN1,GCFC2,RALA,IFRD1,COX10,ANLN,COX15,WWTR1,UBR2,PHF20,FAS,BRD9,UBA6,GABARAPL2,PI4K2B,MAP4,MRPS10,ELN,TRAPPC3,EIF2AK2,AP3D1,ATXN3,EML1,SP100,MAPK6,LMAN1,TIMM21,RAB7A,SART3,UBE2A,UBE2K,GNB1,WBP11,HUWE1,NSFL1C,SNX5,PPP2R3C,SEC22C,CIRBP,TRIOBP,NHP2L1,HSCB,RPL3,RBFOX2,MYH9,VRK1,BRMS1L,NDRG3,DOK5,TM9SF4,SAMHD1,SMARCA1,UBL4A,LONP2,NBN,TBC1D17,VRK3,AKAP8,BET1,TMEM106B,CEP41,YKT6,TLE4,PP…
1		1	1726	680	116	0.171	0.067	GO:0043933	BP	3	macromolecular complex subunit organization	4	NDUFAF7,HCCS,GCFC2,COX10,ANLN,COX15,FAS,GABARAPL2,MRPS10,ELN,TRAPPC3,EIF2AK2,LMAN1,TIMM21,SART3,UBE2K,GNB1,CIRBP,TRIOBP,NHP2L1,HSCB,RPL3,TM9SF4,SAMHD1,BET1,TLE4,RAD51C,COL1A1,EHD1,KCTD10,LIN7A,COL12A1,DPYSL3,WDR77,VPS4B,IDE,TAF12,KHDRBS1,NDUFAF4,OBSL1,TBCC,CNOT1,SNX9,MCCC2,DHX30,PTCD3,MRPL35,ORC3,GLUL,LAMC1,YME1L1,XPA,PDCL,RDX,ACTR2,RAP1GDS1,NUP54,G3BP2,VPS33A,TXNL4B,CSNK1D,PEX14,ITGB3BP,ANP32E,A…
1		1	208	680	10	0.015	0.048	GO:0071824	BP	3	protein-DNA complex subunit organization	5	SART3,RAD51C,TAF12,ORC3,XPA,ITGB3BP,ANP32E,PARP1,SMARCA5,CENPW
1		1	209	680	20	0.029	0.096	GO:0071826	BP	3	ribonucleoprotein complex subunit organization	5	GCFC2,SART3,CIRBP,NHP2L1,RPL3,WDR77,CNOT1,DHX30,G3BP2,TXNL4B,PSIP1,TSR1,RPSA,ZRSR2,EDC3,SF3A3,RRP7A,DDX3X,ISY1,C7ORF55-LUC7L2
1		1	35	680	2	0.003	0.057	GO:0071825	BP	3	protein-lipid complex subunit organization	5	SNX9,ARF1
1		1	1374	680	91	0.134	0.066	GO:0071822	BP	3	protein complex subunit organization	5	NDUFAF7,HCCS,COX10,ANLN,COX15,FAS,GABARAPL2,MRPS10,ELN,TRAPPC3,EIF2AK2,LMAN1,TIMM21,UBE2K,GNB1,TRIOBP,HSCB,TM9SF4,SAMHD1,BET1,TLE4,COL1A1,EHD1,KCTD10,LIN7A,COL12A1,DPYSL3,VPS4B,IDE,KHDRBS1,NDUFAF4,OBSL1,TBCC,SNX9,MCCC2,PTCD3,MRPL35,GLUL,LAMC1,YME1L1,XPA,PDCL,RDX,ACTR2,RAP1GDS1,NUP54,VPS33A,CSNK1D,PEX14,ARF1,PARP1,ARHGAP18,STOM,CDC42EP2,IMPACT,N6AMT1,MRPL17,NCK1,PINK1,AMFR,VMA21,NDUFV3,DDR2,MRPS18…
1		1	495	680	29	0.043	0.059	GO:0022411	BP	3	cellular component disassembly	4	GABARAPL2,MRPS10,ELN,WBP11,TRIOBP,VRK1,VPS4B,NUP214,PTCD3,MRPL35,LAMC1,RDX,NUP54,VPS33A,PEX14,N6AMT1,MMP14,MRPL17,PINK1,LMNA,DDR2,MRPS18C,ABCE1,VCP,ATG13,CTDNEP1,MRPS23,DPP4,LIX1L
1		1	271	680	16	0.024	0.059	GO:0032984	BP	3	macromolecular complex disassembly	5	GABARAPL2,MRPS10,TRIOBP,VPS4B,PTCD3,MRPL35,RDX,VPS33A,PEX14,N6AMT1,MRPL17,MRPS18C,ABCE1,VCP,MRPS23,LIX1L
1		1	242	680	16	0.024	0.066	GO:0043241	BP	3	protein complex disassembly	6	GABARAPL2,MRPS10,TRIOBP,VPS4B,PTCD3,MRPL35,RDX,VPS33A,PEX14,N6AMT1,MRPL17,MRPS18C,ABCE1,VCP,MRPS23,LIX1L
1		1	180	680	12	0.018	0.067	GO:0043624	BP	3	cellular protein complex disassembly	7	MRPS10,TRIOBP,VPS4B,PTCD3,MRPL35,RDX,PEX14,N6AMT1,MRPL17,MRPS18C,ABCE1,MRPS23
1		1	79	680	3	0.004	0.038	GO:0051261	BP	3	protein depolymerization	8	TRIOBP,VPS4B,RDX
1		1	10	680	1	0.001	0.1	GO:1904896	BP	3	ESCRT complex disassembly	7	VPS4B
1		1	10	680	1	0.001	0.1	GO:1904903	BP	3	ESCRT III complex disassembly	8	VPS4B
1		1	205	680	8	0.012	0.039	GO:0034330	BP	3	cell junction organization	4	SDC4,MACF1,LAMC1,RDX,IQGAP1,MMP14,RAB8B,SMAD3
1		1	180	680	7	0.01	0.039	GO:0045216	BP	3	cell-cell junction organization	5	SDC4,MACF1,RDX,IQGAP1,MMP14,RAB8B,SMAD3
1		1	103	680	7	0.01	0.068	GO:0034332	BP	3	adherens junction organization	6	SDC4,MACF1,RDX,IQGAP1,MMP14,RAB8B,SMAD3
1		1	3070	680	186	0.274	0.061	GO:0006996	BP	3	organelle organization	4	NDUFAF7,RALA,COX10,ANLN,WWTR1,UBR2,PHF20,BRD9,GABARAPL2,PI4K2B,MAP4,ELN,TRAPPC3,AP3D1,ATXN3,EML1,SP100,LMAN1,TIMM21,RAB7A,SART3,UBE2A,WBP11,HUWE1,NSFL1C,SNX5,PPP2R3C,SEC22C,CIRBP,TRIOBP,RPL3,MYH9,VRK1,BRMS1L,SMARCA1,UBL4A,LONP2,NBN,TBC1D17,AKAP8,BET1,TMEM106B,CEP41,YKT6,CCDC6,PPIF,RAD51C,PRKAR1A,EHD1,CHD4,FAF2,RAD1,DPYSL3,WNT5A,SNX4,STAM2,STK25,SDC1,ATF2,DOCK7,SSX2IP,DR1,MTFR1L,STAG1,RAB14,PHF19,…
1		1	358	680	22	0.032	0.061	GO:0048285	BP	3	organelle fission	5	COX10,ANLN,UBR2,AKAP8,RAD51C,PRKAR1A,RAD1,WNT5A,MTFR1L,VPS4B,ZWINT,OBSL1,MAU2,USP15,ACTR2,DYNC1LI1,CHEK1,PINK1,LEMD2,SUN1,RCC1,OPA1
1		1	316	680	17	0.025	0.054	GO:0000280	BP	3	nuclear division	6	ANLN,UBR2,AKAP8,RAD51C,PRKAR1A,RAD1,WNT5A,VPS4B,ZWINT,OBSL1,MAU2,ACTR2,DYNC1LI1,CHEK1,LEMD2,SUN1,RCC1
1		1	221	680	9	0.013	0.041	GO:0140014	BP	3	mitotic nuclear division	7	ANLN,AKAP8,VPS4B,ZWINT,OBSL1,MAU2,DYNC1LI1,CHEK1,RCC1
1		1	26	680	1	0.001	0.038	GO:0010458	BP	3	exit from mitosis	8	ANLN
1		1	15	680	2	0.003	0.133	GO:0048308	BP	3	organelle inheritance	5	VRK1,STK25
1		1	16	680	1	0.001	0.062	GO:0034389	BP	3	lipid particle organization	5	FAF2
1		1	140	680	10	0.015	0.071	GO:0007033	BP	3	vacuole organization	5	GABARAPL2,RAB7A,NSFL1C,TMEM106B,CCDC115,SCARB2,VPS33A,ARF1,PINK1,ATG13
1		1	51	680	6	0.009	0.118	GO:0080171	BP	3	lytic vacuole organization	6	RAB7A,TMEM106B,CCDC115,SCARB2,VPS33A,ARF1
1		1	51	680	6	0.009	0.118	GO:0007040	BP	3	lysosome organization	7	RAB7A,TMEM106B,CCDC115,SCARB2,VPS33A,ARF1
1		1	1002	680	56	0.082	0.056	GO:0051276	BP	3	chromosome organization	5	UBR2,PHF20,BRD9,SP100,SART3,UBE2A,HUWE1,VRK1,BRMS1L,SMARCA1,NBN,AKAP8,RAD51C,CHD4,ATF2,DR1,STAG1,PHF19,VPS4B,SUPT7L,TAF12,ZWINT,USP22,POT1,MAU2,UTP3,WBP2,USP15,XPA,BRD4,ITGB3BP,ANP32E,PARP1,DYNC1LI1,CCNA2,HDAC8,OGT,CHEK1,SMARCA5,ING1,PINK1,CHTOP,LEMD2,SUN1,BRD7,CHD3,ASXL1,HIST1H2AC,PPP1CC,WDR5,HDAC2,TLK1,ZNF830,CENPW,DDX3X,DYNLL2
1		1	147	680	6	0.009	0.041	GO:0032200	BP	3	telomere organization	6	SP100,NBN,RAD51C,POT1,PARP1,HDAC8
1		1	220	680	14	0.021	0.064	GO:0071103	BP	3	DNA conformation change	6	SART3,SMARCA1,NBN,AKAP8,CHD4,POT1,XPA,ITGB3BP,ANP32E,PARP1,SMARCA5,CHD3,CENPW,DDX3X
1		1	144	680	6	0.009	0.042	GO:0006323	BP	3	DNA packaging	7	SART3,AKAP8,ITGB3BP,ANP32E,SMARCA5,CENPW
1		1	31	680	1	0.001	0.032	GO:0030261	BP	3	chromosome condensation	8	AKAP8
1		1	78	680	8	0.012	0.103	GO:0032392	BP	3	DNA geometric change	7	SMARCA1,NBN,CHD4,POT1,XPA,PARP1,CHD3,DDX3X
1		1	69	680	7	0.01	0.101	GO:0032508	BP	3	DNA duplex unwinding	8	NBN,CHD4,POT1,XPA,PARP1,CHD3,DDX3X
1		1	16	680	1	0.001	0.062	GO:0051383	BP	3	kinetochore organization	6	CENPW
1		1	211	680	11	0.016	0.052	GO:0000819	BP	3	sister chromatid segregation	6	AKAP8,RAD51C,STAG1,VPS4B,ZWINT,MAU2,ITGB3BP,DYNC1LI1,HDAC8,PPP1CC,DYNLL2
1		1	132	680	5	0.007	0.038	GO:0000070	BP	3	mitotic sister chromatid segregation	7	AKAP8,VPS4B,ZWINT,MAU2,DYNC1LI1
1		1	50	680	1	0.001	0.02	GO:0051306	BP	3	mitotic sister chromatid separation	8	DYNC1LI1
1		1	15	680	1	0.001	0.067	GO:0007076	BP	3	mitotic chromosome condensation	8	AKAP8
1		1	121	680	9	0.013	0.074	GO:0007062	BP	3	sister chromatid cohesion	6	RAD51C,STAG1,ZWINT,MAU2,ITGB3BP,DYNC1LI1,HDAC8,PPP1CC,DYNLL2
1		1	9	680	1	0.001	0.111	GO:0034086	BP	3	maintenance of sister chromatid cohesion	7	MAU2
1		1	4	680	1	0.001	0.25	GO:0034085	BP	3	establishment of sister chromatid cohesion	7	HDAC8
1		1	19	680	1	0.001	0.053	GO:0007064	BP	3	mitotic sister chromatid cohesion	7	MAU2
1		1	9	680	1	0.001	0.111	GO:0034088	BP	3	maintenance of mitotic sister chromatid cohesion	8	MAU2
1		1	498	680	32	0.047	0.064	GO:0007005	BP	3	mitochondrion organization	5	NDUFAF7,COX10,GABARAPL2,TIMM21,WBP11,HUWE1,PPIF,ATF2,MTFR1L,NDUFAF4,PANK2,USP15,NMT1,YME1L1,MCL1,PARP1,PPRC1,MRPL17,PINK1,NDUFV3,LMNA,STAT3,PRELID1,HSPA4,TMEM126B,ATG13,COA4,COA5,NDUFA6,BLOC1S2,OPA1,DYNLL2
1		1	26	680	3	0.004	0.115	GO:0000002	BP	3	mitochondrial genome maintenance	6	PARP1,MRPL17,OPA1
1		1	36	680	5	0.007	0.139	GO:0000266	BP	3	mitochondrial fission	6	COX10,MTFR1L,USP15,PINK1,OPA1
1		1	111	680	10	0.015	0.09	GO:0008637	BP	3	apoptotic mitochondrial changes	6	PPIF,ATF2,NMT1,MCL1,PINK1,LMNA,PRELID1,BLOC1S2,OPA1,DYNLL2
1		1	964	680	50	0.074	0.052	GO:0007010	BP	3	cytoskeleton organization	5	RALA,ANLN,MAP4,ELN,ATXN3,EML1,PPP2R3C,TRIOBP,MYH9,CCDC6,PRKAR1A,CHD4,DPYSL3,DOCK7,SSX2IP,VPS4B,GPSM2,OBSL1,SDC4,MKLN1,MYO1B,ZMYM5,FOPNL,NAV1,PDGFRA,RDX,ACTR2,RAP1GDS1,FRMD6,CSNK1D,PEX14,ARF1,DYNC1LI1,ARHGAP18,CHEK1,CDC42EP2,CETN3,NCK1,LMNA,SUN1,SMAD3,ANTXR1,CHD3,TUBB6,RCC1,TUBB,GMFB,TRIM27,FGFR1OP,EMP2
1		1	7	680	1	0.001	0.143	GO:0030952	BP	3	establishment or maintenance of cytoskeleton polarity	6	LMNA
1		1	3	680	1	0.001	0.333	GO:0032185	BP	3	septin cytoskeleton organization	6	ANLN
1		1	1	680	1	0.001	1	GO:0031106	BP	3	septin ring organization	7	ANLN
1		1	31	680	1	0.001	0.032	GO:0030865	BP	3	cortical cytoskeleton organization	6	PPP2R3C
1		1	482	680	25	0.037	0.052	GO:0030036	BP	3	actin cytoskeleton organization	6	RALA,ELN,ATXN3,TRIOBP,MYH9,PRKAR1A,DPYSL3,OBSL1,SDC4,MKLN1,MYO1B,PDGFRA,RDX,ACTR2,RAP1GDS1,FRMD6,ARF1,ARHGAP18,CDC42EP2,NCK1,SMAD3,ANTXR1,GMFB,TRIM27,EMP2
1		1	10	680	2	0.003	0.2	GO:0031033	BP	3	myosin filament organization	7	OBSL1,RAP1GDS1
1		1	150	680	8	0.012	0.053	GO:0031032	BP	3	actomyosin structure organization	7	ELN,MYH9,PRKAR1A,OBSL1,SDC4,PDGFRA,FRMD6,SMAD3
1		1	75	680	5	0.007	0.067	GO:0031532	BP	3	actin cytoskeleton reorganization	7	RALA,MYH9,MKLN1,PDGFRA,ANTXR1
1		1	388	680	24	0.035	0.062	GO:0000226	BP	3	microtubule cytoskeleton organization	6	MAP4,ATXN3,EML1,PPP2R3C,MYH9,CHD4,DOCK7,SSX2IP,VPS4B,GPSM2,OBSL1,FOPNL,NAV1,CSNK1D,PEX14,DYNC1LI1,CHEK1,CETN3,LMNA,SUN1,CHD3,RCC1,TUBB,FGFR1OP
1		1	55	680	1	0.001	0.018	GO:0001578	BP	3	microtubule bundle formation	7	NAV1
1		1	79	680	1	0.001	0.013	GO:0031109	BP	3	microtubule polymerization or depolymerization	7	CSNK1D
1		1	18	680	3	0.004	0.167	GO:0034453	BP	3	microtubule anchoring	7	FOPNL,PEX14,FGFR1OP
1		1	138	680	10	0.015	0.072	GO:0007051	BP	3	spindle organization	7	MAP4,EML1,MYH9,CHD4,VPS4B,GPSM2,CSNK1D,CHD3,RCC1,TUBB
1		1	3	680	1	0.001	0.333	GO:0030951	BP	3	establishment or maintenance of microtubule cytoskeleton polarity	7	LMNA
1		1	109	680	5	0.007	0.046	GO:1902850	BP	3	microtubule cytoskeleton organization involved in mitosis	7	MAP4,EML1,VPS4B,GPSM2,RCC1
1		1	91	680	5	0.007	0.055	GO:0007052	BP	3	mitotic spindle organization	8	MAP4,EML1,VPS4B,GPSM2,RCC1
1		1	26	680	1	0.001	0.038	GO:0045104	BP	3	intermediate filament cytoskeleton organization	6	ATXN3
1		1	31	680	4	0.006	0.129	GO:0007031	BP	3	peroxisome organization	5	LONP2,PEX14,PEX13,RAB8B
1		1	331	680	23	0.034	0.069	GO:0016050	BP	3	vesicle organization	5	PI4K2B,TRAPPC3,AP3D1,LMAN1,RAB7A,SNX5,SEC22C,TBC1D17,BET1,YKT6,SNX4,STAM2,SDC1,VPS4B,SDC4,SCARB2,CSNK1D,GOLPH3L,ARF1,AP1G1,TMED10,TRAPPC6B,BLOC1S2
1		1	127	680	14	0.021	0.11	GO:0006997	BP	3	nucleus organization	5	NSFL1C,VRK1,VPS4B,NUP214,GOLM1,NUP54,TOR1AIP1,CHEK1,LMNA,LEMD2,SUN1,REEP3,CTDNEP1,ANKLE2
1		1	3	680	1	0.001	0.333	GO:0043578	BP	3	nuclear matrix organization	6	SUN1
1		1	15	680	1	0.001	0.067	GO:0006999	BP	3	nuclear pore organization	6	NUP54
1		1	153	680	6	0.009	0.039	GO:0048284	BP	3	organelle fusion	5	RAB7A,SEC22C,TBC1D17,BET1,YKT6,OPA1
1		1	33	680	4	0.006	0.121	GO:0090382	BP	3	phagosome maturation	5	RAB7A,RAB14,ATP6V1B2,RAB31
1		1	103	680	5	0.007	0.049	GO:1903008	BP	3	organelle disassembly	5	GABARAPL2,WBP11,VRK1,PINK1,ATG13
1		1	84	680	4	0.006	0.048	GO:0061726	BP	3	mitochondrion disassembly	6	GABARAPL2,WBP11,PINK1,ATG13
1		1	353	680	29	0.043	0.082	GO:0010256	BP	3	endomembrane system organization	4	PI4K2B,AP3D1,LMAN1,RAB7A,NSFL1C,VRK1,UBL4A,STAM2,STK25,VPS4B,OBSL1,NUP214,SNX9,RTN3,NUP54,SCARB2,CSNK1D,TOR1AIP1,GOLPH3L,LMNA,LEMD2,SUN1,REEP3,TMED10,CTDNEP1,ANKLE2,BLOC1S2,ATL1,GET4
1		1	41	680	5	0.007	0.122	GO:0007029	BP	3	endoplasmic reticulum organization	5	LMAN1,UBL4A,RTN3,ATL1,GET4
1		1	11	680	1	0.001	0.091	GO:0071786	BP	3	endoplasmic reticulum tubular network organization	6	RTN3
1		1	100	680	9	0.013	0.09	GO:0007030	BP	3	Golgi organization	5	PI4K2B,LMAN1,NSFL1C,VRK1,STK25,OBSL1,CSNK1D,GOLPH3L,TMED10
1		1	14	680	2	0.003	0.143	GO:0048313	BP	3	Golgi inheritance	6	VRK1,STK25
1		1	6	680	1	0.001	0.167	GO:0090166	BP	3	Golgi disassembly	6	VRK1
1		1	24	680	1	0.001	0.042	GO:0033363	BP	3	secretory granule organization	5	BLOC1S2
1		1	8	680	1	0.001	0.125	GO:0060155	BP	3	platelet dense granule organization	6	BLOC1S2
1		1	69	680	5	0.007	0.072	GO:0007032	BP	3	endosome organization	5	PI4K2B,RAB7A,STAM2,VPS4B,SCARB2
1		1	31	680	2	0.003	0.065	GO:0036257	BP	3	multivesicular body organization	6	STAM2,VPS4B
1		1	255	680	16	0.024	0.063	GO:0043062	BP	3	extracellular structure organization	4	ELN,COL1A1,COL12A1,LAMA4,RECK,PDGFRA,LAMC1,APP,MMP14,DDR2,SMAD3,ANTXR1,COL18A1,CD47,DPP4,COL5A2
1		1	254	680	16	0.024	0.063	GO:0030198	BP	3	extracellular matrix organization	5	ELN,COL1A1,COL12A1,LAMA4,RECK,PDGFRA,LAMC1,APP,MMP14,DDR2,SMAD3,ANTXR1,COL18A1,CD47,DPP4,COL5A2
1		1	19	680	1	0.001	0.053	GO:0071711	BP	3	basement membrane organization	6	LAMC1
1		1	68	680	5	0.007	0.074	GO:0022617	BP	3	extracellular matrix disassembly	6	ELN,LAMC1,MMP14,DDR2,DPP4
1		1	179	680	5	0.007	0.028	GO:0050808	BP	3	synapse organization	4	CHD4,WNT5A,APP,FARP1,ETV5
1		1	34	680	2	0.003	0.059	GO:0007528	BP	3	neuromuscular junction development	5	APP,ETV5
1		1	779	680	51	0.075	0.065	GO:0061024	BP	3	membrane organization	4	RALA,GABARAPL2,TRAPPC3,AP3D1,LMAN1,RAB7A,NSFL1C,SEC22C,MYH9,VRK1,UBL4A,TBC1D17,BET1,YKT6,PPIF,RAB35,WNT5A,STAM2,ATF2,RAB14,NUP214,SNX9,NMT1,ACTR2,NUP54,SCARB2,CSNK1D,TOR1AIP1,GOLPH3L,ARF1,TGOLN2,PINK1,LMNA,LEMD2,SUN1,REEP3,RAB8B,RAB31,STAT3,PRELID1,TMED10,HSPA4,CTDNEP1,ANKLE2,TRAPPC6B,BLOC1S2,OPA1,EMP2,GET4,ETV5,DYNLL2
1		1	45	680	5	0.007	0.111	GO:0030397	BP	3	membrane disassembly	5	VRK1,NUP214,NUP54,LMNA,CTDNEP1
1		1	19	680	1	0.001	0.053	GO:0031579	BP	3	membrane raft organization	5	EMP2
1		1	41	680	3	0.004	0.073	GO:0010324	BP	3	membrane invagination	5	MYH9,SNX9,ARF1
1		1	33	680	3	0.004	0.091	GO:0099024	BP	3	plasma membrane invagination	6	MYH9,SNX9,ARF1
1		1	7	680	1	0.001	0.143	GO:0036089	BP	3	cleavage furrow formation	7	SNX9
1		1	2	680	1	0.001	0.5	GO:0036090	BP	3	cleavage furrow ingression	7	ARF1
1		1	1	680	1	0.001	1	GO:1990386	BP	3	mitotic cleavage furrow ingression	8	ARF1
1		1	11	680	1	0.001	0.091	GO:0090148	BP	3	membrane fission	5	OPA1
1		1	189	680	7	0.01	0.037	GO:0061025	BP	3	membrane fusion	5	RAB7A,NSFL1C,SEC22C,TBC1D17,BET1,YKT6,OPA1
1		1	131	680	5	0.007	0.038	GO:0090174	BP	3	organelle membrane fusion	6	RAB7A,SEC22C,TBC1D17,BET1,YKT6
1		1	22	680	1	0.001	0.045	GO:0008053	BP	3	mitochondrial fusion	6	OPA1
1		1	1	680	1	0.001	1	GO:0097749	BP	3	membrane tubulation	5	OPA1
1		1	65	680	1	0.001	0.015	GO:0007009	BP	3	plasma membrane organization	5	SNX9
1		1	17	680	1	0.001	0.059	GO:0097320	BP	3	plasma membrane tubulation	6	SNX9
1		1	27	680	1	0.001	0.037	GO:0001941	BP	3	postsynaptic membrane organization	5	ETV5
1		1	2	680	1	0.001	0.5	GO:0048499	BP	3	synaptic vesicle membrane organization	5	AP3D1
1		1	115	680	9	0.013	0.078	GO:0007006	BP	3	mitochondrial membrane organization	5	PPIF,ATF2,NMT1,PINK1,STAT3,HSPA4,BLOC1S2,OPA1,DYNLL2
1		1	8	680	1	0.001	0.125	GO:0007008	BP	3	outer mitochondrial membrane organization	6	HSPA4
1		1	34	680	2	0.003	0.059	GO:0007007	BP	3	inner mitochondrial membrane organization	6	PINK1,OPA1
1		1	28	680	1	0.001	0.036	GO:0042407	BP	3	cristae formation	7	PINK1
1		1	81	680	11	0.016	0.136	GO:0006998	BP	3	nuclear envelope organization	5	NSFL1C,VRK1,NUP214,NUP54,TOR1AIP1,LMNA,LEMD2,SUN1,REEP3,CTDNEP1,ANKLE2
1		1	17	680	5	0.007	0.294	GO:0031468	BP	3	nuclear envelope reassembly	6	NSFL1C,VRK1,LMNA,REEP3,ANKLE2
1		1	10	680	4	0.006	0.4	GO:0007084	BP	3	mitotic nuclear envelope reassembly	7	VRK1,LMNA,REEP3,ANKLE2
1		1	45	680	5	0.007	0.111	GO:0051081	BP	3	nuclear envelope disassembly	6	VRK1,NUP214,NUP54,LMNA,CTDNEP1
1		1	41	680	5	0.007	0.122	GO:0007077	BP	3	mitotic nuclear envelope disassembly	7	VRK1,NUP214,NUP54,LMNA,CTDNEP1
1		1	6	680	1	0.001	0.167	GO:0071763	BP	3	nuclear membrane organization	5	TOR1AIP1
1		1	2	680	1	0.001	0.5	GO:0097212	BP	3	lysosomal membrane organization	5	ARF1
1		1	1091	680	57	0.084	0.052	GO:0030030	BP	3	cell projection organization	4	RALA,IFRD1,ANLN,WWTR1,UBA6,MAP4,MAPK6,RBFOX2,MYH9,DOK5,TMEM106B,CEP41,PPP3CB,EHD1,RAB35,DPYSL3,WNT5A,STK25,DOCK7,SSX2IP,TCTN3,OBSL1,SDC4,MACF1,PTPRA,FOPNL,RDX,DYNC2LI1,ACTR2,BBS7,SCARB2,PPP3CA,IQGAP1,CSNK1D,APP,CERS2,ARF1,CDC42EP2,FARP1,IMPACT,NCK1,RAB8B,TMEM107,PTPN11,C5ORF30,EXT1,BLOC1S2,TUBB,WDR5,HDAC2,ATL1,OPA1,FGFR1OP,NRAS,EMP2,CUX1,DYNLL2
1		1	1072	680	56	0.082	0.052	GO:0120036	BP	3	plasma membrane bounded cell projection organization	5	RALA,IFRD1,ANLN,WWTR1,UBA6,MAP4,MAPK6,RBFOX2,MYH9,DOK5,TMEM106B,CEP41,PPP3CB,EHD1,RAB35,DPYSL3,WNT5A,STK25,DOCK7,SSX2IP,TCTN3,OBSL1,SDC4,MACF1,PTPRA,FOPNL,RDX,DYNC2LI1,ACTR2,BBS7,SCARB2,PPP3CA,IQGAP1,CSNK1D,APP,CERS2,ARF1,CDC42EP2,FARP1,IMPACT,NCK1,TMEM107,PTPN11,C5ORF30,EXT1,BLOC1S2,TUBB,WDR5,HDAC2,ATL1,OPA1,FGFR1OP,NRAS,EMP2,CUX1,DYNLL2
1		1	57	680	3	0.004	0.053	GO:0106027	BP	3	neuron projection organization	6	ACTR2,ARF1,OPA1
1		1	56	680	3	0.004	0.054	GO:0097061	BP	3	dendritic spine organization	7	ACTR2,ARF1,OPA1
1		1	1	680	1	0.001	1	GO:0032796	BP	3	uropod organization	6	MYH9
1		1	66	680	1	0.001	0.015	GO:0097581	BP	3	lamellipodium organization	6	NCK1
1		1	34	680	1	0.001	0.029	GO:0031529	BP	3	ruffle organization	6	RDX
1		1	12	680	1	0.001	0.083	GO:0031268	BP	3	pseudopodium organization	6	CDC42EP2
1		1	18	680	2	0.003	0.111	GO:0032528	BP	3	microvillus organization	6	RDX,PTPN11
1		1	279	680	17	0.025	0.061	GO:0044782	BP	3	cilium organization	6	WWTR1,MAP4,CEP41,EHD1,SSX2IP,TCTN3,FOPNL,DYNC2LI1,ACTR2,BBS7,CSNK1D,TMEM107,C5ORF30,TUBB,WDR5,FGFR1OP,DYNLL2
1		1	461	680	24	0.035	0.052	GO:0097435	BP	3	supramolecular fiber organization	4	ELN,TRIOBP,COL1A1,PRKAR1A,COL12A1,DPYSL3,OBSL1,SDC4,MYO1B,PDGFRA,RDX,ACTR2,CSNK1D,APP,ARF1,ARHGAP18,CDC42EP2,NCK1,DDR2,SMAD3,GMFB,COL5A2,TRIM27,EMP2
1		1	285	680	16	0.024	0.056	GO:0007015	BP	3	actin filament organization	5	ELN,TRIOBP,DPYSL3,OBSL1,SDC4,MYO1B,RDX,ACTR2,ARF1,ARHGAP18,CDC42EP2,NCK1,SMAD3,GMFB,TRIM27,EMP2
1		1	153	680	10	0.015	0.065	GO:0008154	BP	3	actin polymerization or depolymerization	6	ELN,TRIOBP,RDX,ACTR2,ARF1,ARHGAP18,CDC42EP2,NCK1,GMFB,TRIM27
1		1	43	680	2	0.003	0.047	GO:0030042	BP	3	actin filament depolymerization	7	TRIOBP,RDX
1		1	115	680	6	0.009	0.052	GO:0061572	BP	3	actin filament bundle organization	6	ELN,DPYSL3,SDC4,MYO1B,RDX,SMAD3
1		1	11	680	1	0.001	0.091	GO:0051764	BP	3	actin crosslink formation	6	DPYSL3
1		1	36	680	4	0.006	0.111	GO:0030199	BP	3	collagen fibril organization	5	COL1A1,COL12A1,DDR2,COL5A2
1		1	2261	680	144	0.212	0.064	GO:0022607	BP	3	cellular component assembly	4	NDUFAF7,HCCS,CIAPIN1,GCFC2,RALA,COX10,ANLN,COX15,WWTR1,FAS,GABARAPL2,MAP4,ELN,TRAPPC3,EIF2AK2,LMAN1,TIMM21,RAB7A,SART3,UBE2K,GNB1,NSFL1C,CIRBP,TRIOBP,NHP2L1,HSCB,RPL3,TM9SF4,SAMHD1,NBN,BET1,CEP41,TLE4,GLRX3,RAD51C,COL1A1,PRKAR1A,EHD1,KCTD10,LIN7A,CHD4,DPYSL3,WNT5A,STAM2,STK25,SDC1,WDR77,SSX2IP,VPS4B,IDE,TCTN3,TAF12,KHDRBS1,GPSM2,NDUFAF4,OBSL1,SDC4,TBCC,CNOT1,MACF1,POT1,MYO1B,SNX9,MCCC2,DHX30,RTN3…
1		1	16	680	4	0.006	0.25	GO:0031163	BP	3	metallo-sulfur cluster assembly	5	CIAPIN1,HSCB,GLRX3,ISCA1
1		1	21	680	1	0.001	0.048	GO:0070841	BP	3	inclusion body assembly	5	VCP
1		1	4	680	1	0.001	0.25	GO:0070842	BP	3	aggresome assembly	6	VCP
1		1	1471	680	101	0.149	0.069	GO:0065003	BP	3	macromolecular complex assembly	5	NDUFAF7,HCCS,GCFC2,COX10,ANLN,COX15,FAS,ELN,TRAPPC3,EIF2AK2,LMAN1,TIMM21,SART3,UBE2K,GNB1,CIRBP,TRIOBP,NHP2L1,HSCB,RPL3,TM9SF4,SAMHD1,BET1,TLE4,RAD51C,COL1A1,EHD1,KCTD10,LIN7A,DPYSL3,WDR77,IDE,TAF12,KHDRBS1,NDUFAF4,OBSL1,TBCC,CNOT1,SNX9,MCCC2,DHX30,ORC3,GLUL,LAMC1,YME1L1,XPA,PDCL,RDX,ACTR2,RAP1GDS1,NUP54,G3BP2,TXNL4B,CSNK1D,PEX14,ITGB3BP,ANP32E,ARF1,PARP1,ARHGAP18,STOM,CDC42EP2,SMARCA5,IMPACT,NCK…
1		1	10	680	1	0.001	0.1	GO:0090735	BP	3	DNA repair complex assembly	6	RAD51C
1		1	873	680	66	0.097	0.076	GO:0034622	BP	3	cellular macromolecular complex assembly	6	NDUFAF7,HCCS,GCFC2,COX10,ANLN,COX15,ELN,EIF2AK2,TIMM21,SART3,UBE2K,CIRBP,TRIOBP,NHP2L1,RPL3,TM9SF4,RAD51C,WDR77,TAF12,NDUFAF4,OBSL1,TBCC,CNOT1,SNX9,DHX30,ORC3,XPA,RDX,ACTR2,RAP1GDS1,G3BP2,TXNL4B,CSNK1D,ITGB3BP,ANP32E,ARF1,PARP1,ARHGAP18,CDC42EP2,SMARCA5,NCK1,PINK1,VMA21,NDUFV3,PSIP1,SMAD3,TSR1,RPSA,ZRSR2,TMED10,HSPA4,TMEM126B,PDE4DIP,EDC3,COA4,SF3A3,COA5,NDUFA6,RRP7A,GMFB,OPA1,CENPW,TRIM27,DDX3X,…
1		1	182	680	10	0.015	0.055	GO:0065004	BP	3	protein-DNA complex assembly	7	SART3,RAD51C,TAF12,ORC3,XPA,ITGB3BP,ANP32E,PARP1,SMARCA5,CENPW
1		1	44	680	3	0.004	0.068	GO:0034508	BP	3	centromere complex assembly	8	ITGB3BP,SMARCA5,CENPW
1		1	198	680	20	0.029	0.101	GO:0022618	BP	3	ribonucleoprotein complex assembly	7	GCFC2,SART3,CIRBP,NHP2L1,RPL3,WDR77,CNOT1,DHX30,G3BP2,TXNL4B,PSIP1,TSR1,RPSA,ZRSR2,EDC3,SF3A3,RRP7A,DDX3X,ISY1,C7ORF55-LUC7L2
1		1	9	680	1	0.001	0.111	GO:0000491	BP	3	small nucleolar ribonucleoprotein complex assembly	8	NHP2L1
1		1	7	680	1	0.001	0.143	GO:0000492	BP	3	box C/D snoRNP assembly	9	NHP2L1
1		1	24	680	2	0.003	0.083	GO:0065005	BP	3	protein-lipid complex assembly	6	SNX9,ARF1
1		1	2	680	1	0.001	0.5	GO:0060988	BP	3	lipid tube assembly	7	SNX9
1		1	1155	680	76	0.112	0.066	GO:0006461	BP	3	protein complex assembly	6	NDUFAF7,HCCS,COX10,ANLN,COX15,FAS,ELN,TRAPPC3,EIF2AK2,LMAN1,TIMM21,UBE2K,GNB1,TRIOBP,HSCB,TM9SF4,SAMHD1,BET1,TLE4,COL1A1,EHD1,KCTD10,LIN7A,DPYSL3,IDE,KHDRBS1,NDUFAF4,OBSL1,TBCC,SNX9,MCCC2,GLUL,LAMC1,YME1L1,XPA,PDCL,RDX,ACTR2,RAP1GDS1,NUP54,CSNK1D,PEX14,ARF1,PARP1,ARHGAP18,STOM,CDC42EP2,IMPACT,NCK1,PINK1,AMFR,VMA21,NDUFV3,HGSNAT,VCP,SMAD3,SRR,TMED10,HSPA4,TMEM126B,PDE4DIP,CTNNBIP1,PTPN11,RCC1,COA4…
1		1	390	680	27	0.04	0.069	GO:0051259	BP	3	protein oligomerization	7	FAS,GNB1,HSCB,SAMHD1,COL1A1,EHD1,KCTD10,DPYSL3,IDE,KHDRBS1,SNX9,MCCC2,GLUL,YME1L1,NUP54,PEX14,STOM,AMFR,HGSNAT,VCP,SRR,TMED10,RCC1,NBR1,ATL1,OPA1,TRIM27
1		1	37	680	4	0.006	0.108	GO:0070206	BP	3	protein trimerization	8	GNB1,COL1A1,NUP54,TRIM27
1		1	231	680	13	0.019	0.056	GO:0051260	BP	3	protein homooligomerization	8	FAS,SAMHD1,EHD1,KCTD10,DPYSL3,IDE,GLUL,NUP54,PEX14,STOM,VCP,SRR,ATL1
1		1	111	680	6	0.009	0.054	GO:0051262	BP	3	protein tetramerization	8	SAMHD1,IDE,NUP54,PEX14,SRR,RCC1
1		1	62	680	4	0.006	0.065	GO:0051289	BP	3	protein homotetramerization	9	SAMHD1,IDE,PEX14,SRR
1		1	8	680	2	0.003	0.25	GO:0034214	BP	3	protein hexamerization	8	YME1L1,VCP
1		1	86	680	6	0.009	0.07	GO:0051291	BP	3	protein heterooligomerization	8	GNB1,COL1A1,IDE,MCCC2,NUP54,RCC1
1		1	11	680	3	0.004	0.273	GO:0070208	BP	3	protein heterotrimerization	9	GNB1,COL1A1,NUP54
1		1	27	680	2	0.003	0.074	GO:0051290	BP	3	protein heterotetramerization	9	NUP54,RCC1
1		1	1	680	1	0.001	1	GO:1902605	BP	3	heterotrimeric G-protein complex assembly	7	PDCL
1		1	37	680	1	0.001	0.027	GO:1904837	BP	3	beta-catenin-TCF complex assembly	7	TLE4
1		1	501	680	37	0.054	0.074	GO:0043623	BP	3	cellular protein complex assembly	7	NDUFAF7,HCCS,COX10,ANLN,COX15,ELN,EIF2AK2,TIMM21,UBE2K,TRIOBP,TM9SF4,NDUFAF4,OBSL1,TBCC,RDX,ACTR2,RAP1GDS1,CSNK1D,ARF1,PARP1,ARHGAP18,CDC42EP2,NCK1,PINK1,VMA21,NDUFV3,SMAD3,HSPA4,TMEM126B,PDE4DIP,COA4,COA5,NDUFA6,GMFB,OPA1,CENPW,TRIM27
1		1	12	680	2	0.003	0.167	GO:0070071	BP	3	proton-transporting two-sector ATPase complex assembly	8	TM9SF4,VMA21
1		1	8	680	2	0.003	0.25	GO:0070070	BP	3	proton-transporting V-type ATPase complex assembly	9	TM9SF4,VMA21
1		1	8	680	2	0.003	0.25	GO:0070072	BP	3	vacuolar proton-transporting V-type ATPase complex assembly	10	TM9SF4,VMA21
1		1	8	680	1	0.001	0.125	GO:0044546	BP	3	NLRP3 inflammasome complex assembly	8	EIF2AK2
1		1	16	680	1	0.001	0.062	GO:0051131	BP	3	chaperone-mediated protein complex assembly	8	HSPA4
1		1	29	680	6	0.009	0.207	GO:0017004	BP	3	cytochrome complex assembly	8	HCCS,COX10,COX15,TIMM21,COA4,COA5
1		1	20	680	5	0.007	0.25	GO:0008535	BP	3	respiratory chain complex IV assembly	9	COX10,COX15,TIMM21,COA4,COA5
1		1	56	680	6	0.009	0.107	GO:0010257	BP	3	NADH dehydrogenase complex assembly	8	NDUFAF7,TIMM21,NDUFAF4,NDUFV3,TMEM126B,NDUFA6
1		1	7	680	1	0.001	0.143	GO:0007021	BP	3	tubulin complex assembly	8	TBCC
1		1	202	680	14	0.021	0.069	GO:0051258	BP	3	protein polymerization	8	ELN,UBE2K,TRIOBP,RDX,ACTR2,CSNK1D,ARF1,ARHGAP18,CDC42EP2,NCK1,PINK1,GMFB,OPA1,TRIM27
1		1	7	680	1	0.001	0.143	GO:0003373	BP	3	dynamin family protein polymerization involved in membrane fission	9	OPA1
1		1	7	680	1	0.001	0.143	GO:0003374	BP	3	dynamin family protein polymerization involved in mitochondrial fission	10	OPA1
1		1	57	680	1	0.001	0.018	GO:0046785	BP	3	microtubule polymerization	9	CSNK1D
1		1	24	680	1	0.001	0.042	GO:0007020	BP	3	microtubule nucleation	10	CSNK1D
1		1	126	680	10	0.015	0.079	GO:0030041	BP	3	actin filament polymerization	9	ELN,TRIOBP,RDX,ACTR2,ARF1,ARHGAP18,CDC42EP2,NCK1,GMFB,TRIM27
1		1	82	680	8	0.012	0.098	GO:0033108	BP	3	mitochondrial respiratory chain complex assembly	8	NDUFAF7,TIMM21,NDUFAF4,NDUFV3,TMEM126B,COA4,COA5,NDUFA6
1		1	56	680	6	0.009	0.107	GO:0032981	BP	3	mitochondrial respiratory chain complex I assembly	9	NDUFAF7,TIMM21,NDUFAF4,NDUFV3,TMEM126B,NDUFA6
1		1	15	680	3	0.004	0.2	GO:0033617	BP	3	mitochondrial respiratory chain complex IV assembly	9	TIMM21,COA4,COA5
1		1	9	680	2	0.003	0.222	GO:0031034	BP	3	myosin filament assembly	8	OBSL1,RAP1GDS1
1		1	424	680	24	0.035	0.057	GO:0030031	BP	3	cell projection assembly	5	RALA,ANLN,WWTR1,MAP4,CEP41,EHD1,DPYSL3,SSX2IP,TCTN3,FOPNL,RDX,DYNC2LI1,ACTR2,BBS7,CSNK1D,CDC42EP2,NCK1,TMEM107,C5ORF30,TUBB,WDR5,FGFR1OP,EMP2,DYNLL2
1		1	418	680	24	0.035	0.057	GO:0120031	BP	3	plasma membrane bounded cell projection assembly	6	RALA,ANLN,WWTR1,MAP4,CEP41,EHD1,DPYSL3,SSX2IP,TCTN3,FOPNL,RDX,DYNC2LI1,ACTR2,BBS7,CSNK1D,CDC42EP2,NCK1,TMEM107,C5ORF30,TUBB,WDR5,FGFR1OP,EMP2,DYNLL2
1		1	12	680	1	0.001	0.083	GO:0031269	BP	3	pseudopodium assembly	7	CDC42EP2
1		1	11	680	2	0.003	0.182	GO:0032060	BP	3	bleb assembly	7	ANLN,EMP2
1		1	42	680	2	0.003	0.048	GO:0046847	BP	3	filopodium assembly	7	RALA,DPYSL3
1		1	25	680	1	0.001	0.04	GO:0097178	BP	3	ruffle assembly	7	RDX
1		1	50	680	1	0.001	0.02	GO:0030032	BP	3	lamellipodium assembly	7	NCK1
1		1	13	680	1	0.001	0.077	GO:0030033	BP	3	microvillus assembly	7	RDX
1		1	628	680	45	0.066	0.072	GO:0070925	BP	3	organelle assembly	5	ANLN,WWTR1,GABARAPL2,MAP4,RAB7A,NSFL1C,CIRBP,RPL3,CEP41,PRKAR1A,EHD1,CHD4,STAM2,SDC1,SSX2IP,VPS4B,TCTN3,GPSM2,OBSL1,SDC4,CNOT1,DHX30,FOPNL,PDGFRA,RDX,DYNC2LI1,ACTR2,BBS7,G3BP2,CSNK1D,PINK1,TSR1,RPSA,ATG13,TMEM107,EDC3,RCC1,C5ORF30,RRP7A,TUBB,WDR5,CENPW,FGFR1OP,DDX3X,DYNLL2
1		1	7	680	2	0.003	0.286	GO:0071971	BP	3	extracellular exosome assembly	6	SDC1,SDC4
1		1	30	680	2	0.003	0.067	GO:0036258	BP	3	multivesicular body assembly	6	STAM2,VPS4B
1		1	276	680	17	0.025	0.062	GO:0060271	BP	3	cilium assembly	6	WWTR1,MAP4,CEP41,EHD1,SSX2IP,TCTN3,FOPNL,DYNC2LI1,ACTR2,BBS7,CSNK1D,TMEM107,C5ORF30,TUBB,WDR5,FGFR1OP,DYNLL2
1		1	40	680	4	0.006	0.1	GO:1905515	BP	3	non-motile cilium assembly	7	MAP4,BBS7,CSNK1D,TMEM107
1		1	86	680	6	0.009	0.07	GO:0051225	BP	3	spindle assembly	6	CHD4,VPS4B,GPSM2,CSNK1D,RCC1,TUBB
1		1	52	680	1	0.001	0.019	GO:0090307	BP	3	mitotic spindle assembly	7	VPS4B
1		1	18	680	2	0.003	0.111	GO:0033962	BP	3	cytoplasmic mRNA processing body assembly	6	CNOT1,EDC3
1		1	10	680	3	0.004	0.3	GO:0034063	BP	3	stress granule assembly	6	CIRBP,G3BP2,DDX3X
1		1	54	680	6	0.009	0.111	GO:0042255	BP	3	ribosome assembly	6	RPL3,DHX30,TSR1,RPSA,RRP7A,DDX3X
1		1	4	680	1	0.001	0.25	GO:0061668	BP	3	mitochondrial ribosome assembly	7	DHX30
1		1	5	680	1	0.001	0.2	GO:0042256	BP	3	mature ribosome assembly	7	DDX3X
1		1	27	680	2	0.003	0.074	GO:0000027	BP	3	ribosomal large subunit assembly	7	RPL3,DHX30
1		1	3	680	1	0.001	0.333	GO:1902775	BP	3	mitochondrial large ribosomal subunit assembly	8	DHX30
1		1	17	680	2	0.003	0.118	GO:0000028	BP	3	ribosomal small subunit assembly	7	RPSA,RRP7A
1		1	1	680	1	0.001	1	GO:0000921	BP	3	septin ring assembly	6	ANLN
1		1	12	680	1	0.001	0.083	GO:0051382	BP	3	kinetochore assembly	6	CENPW
1		1	165	680	6	0.009	0.036	GO:0034329	BP	3	cell junction assembly	5	SDC4,MACF1,LAMC1,IQGAP1,MMP14,SMAD3
1		1	80	680	6	0.009	0.075	GO:0007044	BP	3	cell-substrate junction assembly	6	SDC4,MACF1,LAMC1,IQGAP1,MMP14,SMAD3
1		1	8	680	1	0.001	0.125	GO:0031581	BP	3	hemidesmosome assembly	7	LAMC1
1		1	77	680	5	0.007	0.065	GO:0034333	BP	3	adherens junction assembly	6	SDC4,MACF1,IQGAP1,MMP14,SMAD3
1		1	67	680	5	0.007	0.075	GO:0007045	BP	3	cell-substrate adherens junction assembly	7	SDC4,MACF1,IQGAP1,MMP14,SMAD3
1		1	26	680	1	0.001	0.038	GO:0071709	BP	3	membrane assembly	5	EMP2
1		1	10	680	1	0.001	0.1	GO:0001765	BP	3	membrane raft assembly	6	EMP2
1		1	26	680	3	0.004	0.115	GO:0085029	BP	3	extracellular matrix assembly	5	LAMC1,SMAD3,ANTXR1
1		1	9	680	1	0.001	0.111	GO:0070831	BP	3	basement membrane assembly	6	LAMC1
1		1	4	680	1	0.001	0.25	GO:0032202	BP	3	telomere assembly	5	POT1
1		1	4	680	1	0.001	0.25	GO:0071787	BP	3	endoplasmic reticulum tubular network formation	5	RTN3
1		1	4	680	1	0.001	0.25	GO:0090168	BP	3	Golgi reassembly	5	STK25
1		1	115	680	6	0.009	0.052	GO:0051017	BP	3	actin filament bundle assembly	5	ELN,DPYSL3,SDC4,MYO1B,RDX,SMAD3
1		1	79	680	3	0.004	0.038	GO:0030038	BP	3	contractile actin filament bundle assembly	6	ELN,SDC4,SMAD3
1		1	79	680	3	0.004	0.038	GO:0043149	BP	3	stress fiber assembly	7	ELN,SDC4,SMAD3
1		1	6	680	1	0.001	0.167	GO:0072553	BP	3	terminal button organization	4	CHD4
1		1	611	680	39	0.057	0.064	GO:0006325	BP	3	chromatin organization	4	UBR2,PHF20,BRD9,SART3,UBE2A,HUWE1,VRK1,BRMS1L,SMARCA1,AKAP8,CHD4,ATF2,DR1,PHF19,SUPT7L,TAF12,USP22,UTP3,WBP2,USP15,BRD4,ITGB3BP,ANP32E,CCNA2,HDAC8,OGT,CHEK1,SMARCA5,ING1,PINK1,CHTOP,BRD7,CHD3,ASXL1,HIST1H2AC,WDR5,HDAC2,TLK1,CENPW
1		1	32	680	3	0.004	0.094	GO:0061641	BP	3	CENP-A containing chromatin organization	5	ITGB3BP,SMARCA5,CENPW
1		1	131	680	8	0.012	0.061	GO:0006338	BP	3	chromatin remodeling	5	SMARCA1,CHD4,ITGB3BP,ANP32E,CHEK1,SMARCA5,HDAC2,CENPW
1		1	36	680	3	0.004	0.083	GO:0031055	BP	3	chromatin remodeling at centromere	6	ITGB3BP,SMARCA5,CENPW
1		1	62	680	7	0.01	0.113	GO:0043044	BP	3	ATP-dependent chromatin remodeling	6	SMARCA1,CHD4,ITGB3BP,ANP32E,SMARCA5,HDAC2,CENPW
1		1	134	680	8	0.012	0.06	GO:0006333	BP	3	chromatin assembly or disassembly	5	SART3,ITGB3BP,ANP32E,HDAC8,SMARCA5,CHD3,TLK1,CENPW
1		1	110	680	5	0.007	0.045	GO:0031497	BP	3	chromatin assembly	6	SART3,ITGB3BP,ANP32E,SMARCA5,CENPW
1		1	118	680	5	0.007	0.042	GO:0034728	BP	3	nucleosome organization	5	SART3,ITGB3BP,ANP32E,SMARCA5,CENPW
1		1	44	680	3	0.004	0.068	GO:0034724	BP	3	DNA replication-independent nucleosome organization	6	ITGB3BP,SMARCA5,CENPW
1		1	42	680	4	0.006	0.095	GO:0043486	BP	3	histone exchange	6	ITGB3BP,ANP32E,SMARCA5,CENPW
1		1	7	680	1	0.001	0.143	GO:0016584	BP	3	nucleosome positioning	6	SMARCA5
1		1	94	680	5	0.007	0.053	GO:0006334	BP	3	nucleosome assembly	6	SART3,ITGB3BP,ANP32E,SMARCA5,CENPW
1		1	43	680	3	0.004	0.07	GO:0006336	BP	3	DNA replication-independent nucleosome assembly	7	ITGB3BP,SMARCA5,CENPW
1		1	32	680	3	0.004	0.094	GO:0034080	BP	3	CENP-A containing nucleosome assembly	8	ITGB3BP,SMARCA5,CENPW
1		1	116	680	5	0.007	0.043	GO:0031023	BP	3	microtubule organizing center organization	4	SSX2IP,VPS4B,CHEK1,CETN3,CHD3
1		1	109	680	5	0.007	0.046	GO:0007098	BP	3	centrosome cycle	5	SSX2IP,VPS4B,CHEK1,CETN3,CHD3
1		1	14	680	1	0.001	0.071	GO:0051299	BP	3	centrosome separation	6	CHEK1
1		1	13	680	1	0.001	0.077	GO:0007100	BP	3	mitotic centrosome separation	7	CHEK1
1		1	60	680	1	0.001	0.017	GO:0051298	BP	3	centrosome duplication	6	VPS4B
1		1	28	680	1	0.001	0.036	GO:0098534	BP	3	centriole assembly	5	VPS4B
1		1	27	680	1	0.001	0.037	GO:0007099	BP	3	centriole replication	6	VPS4B
1		1	4	680	1	0.001	0.25	GO:0061511	BP	3	centriole elongation	7	VPS4B
1		1	926	680	42	0.062	0.045	GO:0022610	BP	3	biological adhesion	2	AP3D1,ATXN3,FSTL3,TRIOBP,MYH9,TM9SF4,COL1A1,DUSP3,PRKAR1A,COL12A1,LAMA4,WNT5A,SSX2IP,SDC4,MACF1,MKLN1,TWSG1,NDFIP1,PDGFRA,LAMC1,LMO7,RDX,IQGAP1,APP,ITGB3BP,MMP14,NCK1,DDR2,CITED2,SERPINB8,AKIP1,SMAD3,RPSA,PRELID1,ANTXR1,SOCS6,RGMB,PTPN11,COL18A1,CD47,DPP4,EMP2
1		1	921	680	42	0.062	0.046	GO:0007155	BP	3	cell adhesion	3	AP3D1,ATXN3,FSTL3,TRIOBP,MYH9,TM9SF4,COL1A1,DUSP3,PRKAR1A,COL12A1,LAMA4,WNT5A,SSX2IP,SDC4,MACF1,MKLN1,TWSG1,NDFIP1,PDGFRA,LAMC1,LMO7,RDX,IQGAP1,APP,ITGB3BP,MMP14,NCK1,DDR2,CITED2,SERPINB8,AKIP1,SMAD3,RPSA,PRELID1,ANTXR1,SOCS6,RGMB,PTPN11,COL18A1,CD47,DPP4,EMP2
1		1	259	680	13	0.019	0.05	GO:0031589	BP	3	cell-substrate adhesion	4	ATXN3,TRIOBP,COL1A1,SDC4,MACF1,MKLN1,LAMC1,IQGAP1,MMP14,AKIP1,SMAD3,ANTXR1,EMP2
1		1	167	680	7	0.01	0.042	GO:0007160	BP	3	cell-matrix adhesion	5	SDC4,MACF1,MKLN1,IQGAP1,MMP14,SMAD3,EMP2
1		1	67	680	5	0.007	0.075	GO:0048041	BP	3	focal adhesion assembly	6	SDC4,MACF1,IQGAP1,MMP14,SMAD3
1		1	45	680	2	0.003	0.044	GO:0033627	BP	3	cell adhesion mediated by integrin	4	PTPN11,DPP4
1		1	520	680	21	0.031	0.04	GO:0098609	BP	3	cell-cell adhesion	4	AP3D1,FSTL3,MYH9,DUSP3,PRKAR1A,WNT5A,SDC4,TWSG1,NDFIP1,PDGFRA,LMO7,RDX,NCK1,CITED2,SERPINB8,RPSA,PRELID1,SOCS6,PTPN11,CD47,DPP4
1		1	243	680	12	0.018	0.049	GO:0007159	BP	3	leukocyte cell-cell adhesion	5	AP3D1,DUSP3,PRKAR1A,SDC4,TWSG1,NDFIP1,NCK1,PRELID1,SOCS6,PTPN11,CD47,DPP4
1		1	51	680	3	0.004	0.059	GO:0034109	BP	3	homotypic cell-cell adhesion	5	MYH9,PDGFRA,RDX
1		1	14	680	1	0.001	0.071	GO:0090136	BP	3	epithelial cell-cell adhesion	5	SERPINB8
1		1	9	680	1	0.001	0.111	GO:0044331	BP	3	cell-cell adhesion mediated by cadherin	5	WNT5A
1		1	10	680	1	0.001	0.1	GO:0033631	BP	3	cell-cell adhesion mediated by integrin	5	DPP4
1		1	1698	680	89	0.131	0.052	GO:0051704	BP	3	multi-organism process	2	RALA,RNF216,PTBP1,UBR2,KPNA6,FAS,EIF2AK2,SP100,FSTL3,RAB7A,PPP2R3C,NHP2L1,RPL3,POLR3H,NDRG3,SAMHD1,POLR2C,AKAP8,HNRNPUL1,NAMPT,PPP3CB,RAD51C,PRKAR1A,SLC38A1,WNT5A,TUSC2,MAPKAPK3,RPL22,IVNS1ABP,RAB14,VPS4B,IDE,KHDRBS1,RECK,RNF114,GTF2F1,PANK2,RBCK1,NUP214,ZFP36,RTN3,PDGFRA,USP15,TANK,NUP54,SCARB2,BRD4,APP,UBAP2L,ARF1,DYNC1LI1,CCNA2,STOM,LARP1,NCK1,STC1,NXF1,PEX13,AZI2,POLR2H,ABCE1,CITED2,SUN1,PSIP…
1		1	734	680	46	0.068	0.063	GO:0044419	BP	3	interspecies interaction between organisms	3	RALA,RNF216,PTBP1,EIF2AK2,SP100,RAB7A,RPL3,POLR2C,TUSC2,RPL22,IVNS1ABP,VPS4B,IDE,GTF2F1,RBCK1,NUP214,RTN3,PDGFRA,TANK,NUP54,SCARB2,BRD4,ARF1,DYNC1LI1,CCNA2,STOM,LARP1,NXF1,AZI2,POLR2H,ABCE1,PSIP1,UBAP1,VCP,AP1G1,SMAD3,RPSA,STAT3,ATF7,RCC1,EXOC7,RPL14,DPP4,TRIM27,DDX3X,APOBEC3C
1		1	721	680	46	0.068	0.064	GO:0044403	BP	3	symbiosis, encompassing mutualism through parasitism	4	RALA,RNF216,PTBP1,EIF2AK2,SP100,RAB7A,RPL3,POLR2C,TUSC2,RPL22,IVNS1ABP,VPS4B,IDE,GTF2F1,RBCK1,NUP214,RTN3,PDGFRA,TANK,NUP54,SCARB2,BRD4,ARF1,DYNC1LI1,CCNA2,STOM,LARP1,NXF1,AZI2,POLR2H,ABCE1,PSIP1,UBAP1,VCP,AP1G1,SMAD3,RPSA,STAT3,ATF7,RCC1,EXOC7,RPL14,DPP4,TRIM27,DDX3X,APOBEC3C
1		1	32	680	2	0.003	0.062	GO:0052192	BP	3	movement in environment of other organism involved in symbiotic interaction	5	RAB7A,VPS4B
1		1	680	680	44	0.065	0.065	GO:0016032	BP	3	viral process	5	RALA,RNF216,PTBP1,EIF2AK2,SP100,RAB7A,RPL3,POLR2C,RPL22,IVNS1ABP,VPS4B,IDE,GTF2F1,RBCK1,NUP214,RTN3,PDGFRA,TANK,NUP54,SCARB2,BRD4,ARF1,DYNC1LI1,CCNA2,STOM,LARP1,NXF1,AZI2,POLR2H,ABCE1,PSIP1,UBAP1,VCP,AP1G1,SMAD3,RPSA,STAT3,ATF7,RCC1,RPL14,DPP4,TRIM27,DDX3X,APOBEC3C
1		1	11	680	1	0.001	0.091	GO:0019042	BP	3	viral latency	6	PSIP1
1		1	179	680	11	0.016	0.061	GO:0019080	BP	3	viral gene expression	6	PTBP1,RPL3,POLR2C,RPL22,GTF2F1,NUP214,NUP54,POLR2H,RPSA,RPL14,TRIM27
1		1	265	680	15	0.022	0.057	GO:0019058	BP	3	viral life cycle	6	EIF2AK2,RAB7A,VPS4B,IDE,NUP214,NUP54,SCARB2,STOM,LARP1,UBAP1,VCP,RPSA,DPP4,DDX3X,APOBEC3C
1		1	22	680	3	0.004	0.136	GO:0050690	BP	3	regulation of defense response to virus by virus	6	EIF2AK2,ARF1,AP1G1
1		1	165	680	10	0.015	0.061	GO:0019083	BP	3	viral transcription	6	RPL3,POLR2C,RPL22,GTF2F1,NUP214,NUP54,POLR2H,RPSA,RPL14,TRIM27
1		1	9	680	1	0.001	0.111	GO:0019043	BP	3	establishment of viral latency	6	PSIP1
1		1	8	680	1	0.001	0.125	GO:0075713	BP	3	establishment of integrated proviral latency	7	PSIP1
1		1	97	680	6	0.009	0.062	GO:0019079	BP	3	viral genome replication	6	EIF2AK2,STOM,LARP1,VCP,DDX3X,APOBEC3C
1		1	36	680	1	0.001	0.028	GO:0019068	BP	3	virion assembly	6	VPS4B
1		1	14	680	1	0.001	0.071	GO:0019081	BP	3	viral translation	6	PTBP1
1		1	10	680	1	0.001	0.1	GO:0075522	BP	3	IRES-dependent viral translational initiation	6	PTBP1
1		1	24	680	1	0.001	0.042	GO:0046755	BP	3	viral budding	6	VPS4B
1		1	21	680	1	0.001	0.048	GO:0039702	BP	3	viral budding via host ESCRT complex	7	VPS4B
1		1	173	680	10	0.015	0.058	GO:0051701	BP	3	interaction with host	4	EIF2AK2,RAB7A,TUSC2,VPS4B,IDE,SCARB2,SMAD3,RPSA,EXOC7,DPP4
1		1	106	680	5	0.007	0.047	GO:0051828	BP	3	entry into other organism involved in symbiotic interaction	5	IDE,SCARB2,RPSA,EXOC7,DPP4
1		1	106	680	5	0.007	0.047	GO:0044409	BP	3	entry into host	6	IDE,SCARB2,RPSA,EXOC7,DPP4
1		1	106	680	5	0.007	0.047	GO:0051806	BP	3	entry into cell of other organism involved in symbiotic interaction	6	IDE,SCARB2,RPSA,EXOC7,DPP4
1		1	106	680	5	0.007	0.047	GO:0030260	BP	3	entry into host cell	7	IDE,SCARB2,RPSA,EXOC7,DPP4
1		1	18	680	1	0.001	0.056	GO:0035635	BP	3	entry of bacterium into host cell	8	EXOC7
1		1	90	680	4	0.006	0.044	GO:0046718	BP	3	viral entry into host cell	8	IDE,SCARB2,RPSA,DPP4
1		1	32	680	2	0.003	0.062	GO:0052126	BP	3	movement in host environment	5	RAB7A,VPS4B
1		1	32	680	2	0.003	0.062	GO:0035890	BP	3	exit from host	6	RAB7A,VPS4B
1		1	32	680	2	0.003	0.062	GO:0035891	BP	3	exit from host cell	7	RAB7A,VPS4B
1		1	32	680	2	0.003	0.062	GO:0019076	BP	3	viral release from host cell	8	RAB7A,VPS4B
1		1	92	680	4	0.006	0.043	GO:0035821	BP	3	modification of morphology or physiology of other organism	4	EIF2AK2,TUSC2,STOM,SMAD3
1		1	21	680	1	0.001	0.048	GO:0044364	BP	3	disruption of cells of other organism	5	TUSC2
1		1	78	680	4	0.006	0.051	GO:0051817	BP	3	modification of morphology or physiology of other organism involved in symbiotic interaction	5	EIF2AK2,TUSC2,STOM,SMAD3
1		1	37	680	2	0.003	0.054	GO:0044003	BP	3	modification by symbiont of host morphology or physiology	6	EIF2AK2,SMAD3
1		1	31	680	2	0.003	0.065	GO:0019048	BP	3	modulation by virus of host morphology or physiology	7	EIF2AK2,SMAD3
1		1	9	680	1	0.001	0.111	GO:0051818	BP	3	disruption of cells of other organism involved in symbiotic interaction	6	TUSC2
1		1	51	680	2	0.003	0.039	GO:0051702	BP	3	interaction with symbiont	4	TUSC2,STOM
1		1	47	680	2	0.003	0.043	GO:0051851	BP	3	modification by host of symbiont morphology or physiology	5	TUSC2,STOM
1		1	19	680	1	0.001	0.053	GO:0044788	BP	3	modulation by host of viral process	6	STOM
1		1	36	680	1	0.001	0.028	GO:0051703	BP	3	intraspecies interaction between organisms	3	PPP3CB
1		1	53	680	7	0.01	0.132	GO:0042440	BP	3	pigment metabolic process	3	COX10,COX15,AP3D1,WNT5A,MTHFD1L,PRPS1,GART
1		1	45	680	7	0.01	0.156	GO:0046148	BP	3	pigment biosynthetic process	4	COX10,COX15,AP3D1,WNT5A,MTHFD1L,PRPS1,GART
1		1	35	680	1	0.001	0.029	GO:0019748	BP	3	secondary metabolic process	3	WNT5A
1		1	8045	680	457	0.672	0.057	GO:0044238	BP	3	primary metabolic process	3	DPM1,NDUFAF7,SLC25A13,HCCS,GCFC2,COX10,UBE3C,RNF216,PTBP1,UBR7,MAP4K5,SLC30A9,COX15,WWTR1,ZFP64,SERPINB1,UBR2,PHF20,KPNA6,FAS,BRD9,UBA6,GABARAPL2,ADSS,METTL1,PI4K2B,TDP1,DCUN1D1,MRPS10,DKK3,EIF2AK2,SLC2A3,SNRNP40,MED29,NFYC,ATXN3,DDX3Y,SP100,MAPK6,FSTL3,RNF126,TCF3,MAP3K13,LMAN1,FOSL2,RAB7A,SART3,UBE2A,UBE2K,TULP3,MKNK1,STK17B,KCNK2,DIS3,WBP11,SEPHS1,HUWE1,KHSRP,CRLS1,NSFL1C,TASP1,TBX5,BRAP,DNAJB…
1		1	5082	680	265	0.39	0.052	GO:0009058	BP	3	biosynthetic process	3	DPM1,SLC25A13,CIAPIN1,GCFC2,COX10,SLC30A9,COX15,WWTR1,ZFP64,UBR2,PHF20,KPNA6,BRD9,ADSS,PI4K2B,MRPS10,DKK3,EIF2AK2,MED29,NFYC,ATXN3,DDX3Y,SP100,FSTL3,TCF3,MAP3K13,LMAN1,FOSL2,TULP3,MKNK1,KCNK2,SEPHS1,KHSRP,CRLS1,TASP1,TBX5,SCD,CIRBP,HSCB,POLDIP3,RPL3,RBFOX2,POLR3H,PIGH,BRMS1L,CDS2,RNMT,SMARCA1,POLR2C,ZNF174,MTFMT,NBN,IMPAD1,INTS10,TUSC3,AKAP8,HNRNPUL1,NAMPT,TLE4,PPP3CB,LHPP,LARP4B,GLRX3,RAD51C,PIG…
1		1	12	680	1	0.001	0.083	GO:0044550	BP	3	secondary metabolite biosynthetic process	4	WNT5A
1		1	2032	680	134	0.197	0.066	GO:0009056	BP	3	catabolic process	3	RNF216,WWTR1,UBR2,UBA6,GABARAPL2,ATXN3,RNF126,RAB7A,UBE2A,UBE2K,DIS3,OXCT1,WBP11,HUWE1,KHSRP,NSFL1C,SNX5,USP48,ECHDC1,CRAT,CIRBP,RPL3,SLC25A17,SAMHD1,USP14,LONP2,TBC1D17,COL1A1,KCTD10,LTA4H,MAGOHB,COL12A1,FAF2,OGG1,WNT5A,NCBP2,STAM2,SDC1,PCYOX1,RPL22,UCHL5,ECE1,VPS4B,IDE,ACAT2,RBBP6,VPS26A,RNF11,SDC4,RNF114,USP22,CNOT1,PSMF1,RBCK1,HNRNPR,NUP214,ZFP36,DDA1,SNX9,EXOSC2,RLIM,MGAT1,NDFIP1,MCCC2,HSD17…
1		1	363	680	17	0.025	0.047	GO:1901615	BP	3	organic hydroxy compound metabolic process	4	DPM1,DKK3,NFYC,SCD,IMPAD1,WNT5A,HDLBP,OSBPL9,ACAT2,MRS2,INSIG2,PANK2,HSD17B4,APP,PTS,PDXK,ADH5
1		1	5024	680	261	0.384	0.052	GO:1901360	BP	3	organic cyclic compound metabolic process	4	DPM1,NDUFAF7,SLC25A13,GCFC2,COX10,PTBP1,SLC30A9,COX15,WWTR1,ZFP64,UBR2,PHF20,KPNA6,BRD9,ADSS,METTL1,TDP1,DKK3,EIF2AK2,SNRNP40,MED29,NFYC,ATXN3,DDX3Y,SP100,FSTL3,TCF3,MAP3K13,FOSL2,SART3,UBE2A,TULP3,KCNK2,DIS3,WBP11,HUWE1,KHSRP,TASP1,TBX5,DNAJB11,HNRNPH3,SCD,CIRBP,NHP2L1,POLDIP3,RPL3,RBFOX2,POLR3H,BRMS1L,SAMHD1,METTL4,RNMT,SMARCA1,POLR2C,ZNF174,MTFMT,NBN,IMPAD1,INTS10,AKAP8,HNRNPUL1,NAMPT,TLE4,PPP…
1		1	104	680	4	0.006	0.038	GO:1901568	BP	3	fatty acid derivative metabolic process	4	OXCT1,SCD,LTA4H,HSD17B4
1		1	10	680	1	0.001	0.1	GO:1902224	BP	3	ketone body metabolic process	5	OXCT1
1		1	3416	680	214	0.315	0.063	GO:0043412	BP	3	macromolecule modification	5	DPM1,NDUFAF7,HCCS,UBE3C,RNF216,UBR7,MAP4K5,WWTR1,UBR2,PHF20,FAS,BRD9,UBA6,METTL1,DCUN1D1,EIF2AK2,ATXN3,MAPK6,FSTL3,RNF126,MAP3K13,LMAN1,SART3,UBE2A,UBE2K,MKNK1,STK17B,SEPHS1,HUWE1,BRAP,DNAJB11,USP48,PPP2R3C,TRIOBP,PIGH,VRK1,BRMS1L,DOK5,USP14,METTL4,RNMT,SMARCA1,UBL4A,MTFMT,NBN,TUSC3,VRK3,AKAP8,CEP41,PPP3CB,LHPP,PPIF,PIGL,DUSP3,PRKAR1A,DCUN1D4,RNF141,KCTD10,CHD4,CCNC,PTP4A1,PRPF4B,CLK4,OGG1,WNT5A,…
1		1	97	680	8	0.012	0.082	GO:0098732	BP	3	macromolecule deacylation	6	BRMS1L,AKAP8,CHD4,LYPLAL1,HDAC8,PINK1,CHD3,HDAC2
1		1	5	680	1	0.001	0.2	GO:0098734	BP	3	macromolecule depalmitoylation	7	LYPLAL1
1		1	471	680	36	0.053	0.076	GO:0016569	BP	3	covalent chromatin modification	6	UBR2,PHF20,BRD9,SART3,UBE2A,HUWE1,VRK1,BRMS1L,SMARCA1,AKAP8,CHD4,ATF2,DR1,PHF19,SUPT7L,TAF12,USP22,UTP3,WBP2,USP15,BRD4,ANP32E,CCNA2,HDAC8,OGT,CHEK1,SMARCA5,ING1,PINK1,CHTOP,BRD7,CHD3,ASXL1,WDR5,HDAC2,TLK1
1		1	4356	680	237	0.349	0.054	GO:0010467	BP	3	gene expression	5	GCFC2,PTBP1,SLC30A9,WWTR1,ZFP64,UBR2,PHF20,KPNA6,FAS,BRD9,METTL1,MRPS10,DKK3,EIF2AK2,SNRNP40,MED29,NFYC,ATXN3,DDX3Y,SP100,MAPK6,FSTL3,TCF3,MAP3K13,FOSL2,SART3,TULP3,MKNK1,DIS3,WBP11,KHSRP,TASP1,TBX5,HNRNPH3,CIRBP,NHP2L1,HSCB,POLDIP3,RPL3,RBFOX2,MYH9,POLR3H,BRMS1L,RNMT,SMARCA1,LONP2,POLR2C,ZNF174,MTFMT,INTS10,AKAP8,HNRNPUL1,NAMPT,TLE4,PPP3CB,LARP4B,GLRX3,COL1A1,PRKAR1A,KLF3,RNF141,MAGOHB,KRR1,CHD4…
1		1	129	680	6	0.009	0.047	GO:0140053	BP	3	mitochondrial gene expression	6	MRPS10,PTCD3,MRPL35,MRPL17,MRPS18C,MRPS23
1		1	5032	680	261	0.384	0.052	GO:1901576	BP	3	organic substance biosynthetic process	4	DPM1,SLC25A13,GCFC2,COX10,SLC30A9,COX15,WWTR1,ZFP64,UBR2,PHF20,KPNA6,BRD9,ADSS,PI4K2B,MRPS10,DKK3,EIF2AK2,MED29,NFYC,ATXN3,DDX3Y,SP100,FSTL3,TCF3,MAP3K13,LMAN1,FOSL2,TULP3,MKNK1,KCNK2,SEPHS1,KHSRP,CRLS1,TASP1,TBX5,SCD,CIRBP,POLDIP3,RPL3,RBFOX2,POLR3H,PIGH,BRMS1L,CDS2,RNMT,SMARCA1,POLR2C,ZNF174,MTFMT,NBN,IMPAD1,INTS10,TUSC3,AKAP8,HNRNPUL1,NAMPT,TLE4,PPP3CB,LHPP,LARP4B,RAD51C,PIGL,COL1A1,PRKAR1A,KL…
1		1	173	680	11	0.016	0.064	GO:1901617	BP	3	organic hydroxy compound biosynthetic process	5	DKK3,NFYC,SCD,IMPAD1,WNT5A,OSBPL9,ACAT2,INSIG2,HSD17B4,PTS,PDXK
1		1	3586	680	172	0.253	0.048	GO:1901362	BP	3	organic cyclic compound biosynthetic process	5	SLC25A13,GCFC2,COX10,SLC30A9,COX15,WWTR1,ZFP64,UBR2,PHF20,KPNA6,BRD9,ADSS,DKK3,EIF2AK2,MED29,NFYC,ATXN3,SP100,FSTL3,TCF3,MAP3K13,FOSL2,TULP3,KCNK2,KHSRP,TASP1,TBX5,SCD,POLDIP3,RBFOX2,POLR3H,BRMS1L,RNMT,SMARCA1,POLR2C,ZNF174,NBN,INTS10,AKAP8,HNRNPUL1,NAMPT,TLE4,PPP3CB,LHPP,RAD51C,COL1A1,PRKAR1A,KLF3,RNF141,MAGOHB,CHD4,CCNC,OGG1,WNT5A,NCBP2,COMMD2,GTF3C2,ID2,ATF2,WDR77,IVNS1ABP,UCHL5,PHTF1,DR1,OSBP…
1		1	4204	680	218	0.321	0.052	GO:0009059	BP	3	macromolecule biosynthetic process	5	DPM1,GCFC2,SLC30A9,WWTR1,ZFP64,UBR2,PHF20,KPNA6,BRD9,MRPS10,DKK3,EIF2AK2,MED29,NFYC,ATXN3,DDX3Y,SP100,FSTL3,TCF3,MAP3K13,LMAN1,FOSL2,TULP3,MKNK1,KCNK2,KHSRP,TASP1,TBX5,CIRBP,POLDIP3,RPL3,RBFOX2,POLR3H,PIGH,BRMS1L,RNMT,SMARCA1,POLR2C,ZNF174,MTFMT,NBN,INTS10,TUSC3,AKAP8,HNRNPUL1,NAMPT,TLE4,PPP3CB,LARP4B,RAD51C,PIGL,COL1A1,PRKAR1A,KLF3,RNF141,MAGOHB,CHD4,CCNC,RAD1,OGG1,WNT5A,GBE1,NCBP2,COMMD2,GTF3C2…
1		1	14	680	1	0.001	0.071	GO:0051767	BP	3	nitric-oxide synthase biosynthetic process	6	NAMPT
1		1	7	680	1	0.001	0.143	GO:0045342	BP	3	MHC class II biosynthetic process	6	HDAC2
1		1	62	680	2	0.003	0.032	GO:1901570	BP	3	fatty acid derivative biosynthetic process	5	SCD,LTA4H
1		1	1663	680	113	0.166	0.068	GO:1901575	BP	3	organic substance catabolic process	4	RNF216,WWTR1,UBR2,UBA6,GABARAPL2,ATXN3,RNF126,RAB7A,UBE2A,UBE2K,DIS3,OXCT1,HUWE1,KHSRP,NSFL1C,USP48,ECHDC1,CRAT,CIRBP,RPL3,SLC25A17,SAMHD1,USP14,LONP2,KCTD10,LTA4H,MAGOHB,FAF2,OGG1,WNT5A,NCBP2,SDC1,PCYOX1,RPL22,UCHL5,ECE1,VPS4B,IDE,ACAT2,RBBP6,RNF11,SDC4,RNF114,USP22,CNOT1,PSMF1,RBCK1,HNRNPR,NUP214,ZFP36,DDA1,SNX9,EXOSC2,RLIM,MGAT1,NDFIP1,MCCC2,HSD17B4,USP15,GNS,GLUL,MTHFS,CCDC115,UGGT1,YME1L1,RN…
1		1	507	680	28	0.041	0.055	GO:1901361	BP	3	organic cyclic compound catabolic process	5	DIS3,KHSRP,CIRBP,RPL3,SAMHD1,MAGOHB,OGG1,NCBP2,RPL22,CNOT1,PSMF1,HNRNPR,NUP214,ZFP36,EXOSC2,MGAT1,MTHFS,LARP1,CNOT8,PAPD4,VCP,RPSA,EDC3,YTHDF3,RPL14,ENTPD4,NUDT16,APOBEC3C
1		1	5	680	1	0.001	0.2	GO:1901569	BP	3	fatty acid derivative catabolic process	5	OXCT1
1		1	1029	680	61	0.09	0.059	GO:1901135	BP	3	carbohydrate derivative metabolic process	4	DPM1,NDUFAF7,SLC25A13,COX10,COX15,ADSS,LMAN1,PIGH,SAMHD1,IMPAD1,TUSC3,PPIF,PIGL,OGG1,WNT5A,SDC1,CHPF,SDC4,OARD1,PANK2,NUP214,UCK1,MGAT1,MCCC2,RFK,GNS,UGGT1,PDCL,NUP54,PHLDA1,GALNT2,PARP1,OGT,PRPS1,ATP6V1B2,AK3,PINK1,GART,AMFR,NDUFV3,TYW5,POGLUT1,PIGX,HGSNAT,VCP,NDST2,STAT3,B3GALNT1,B3GALT6,CHID1,EXT1,BACE2,TRAK1,NDUFA6,ENTPD4,PSAP,NUDT16,OPA1,OSTC,HEXA,APOBEC3C
1		1	145	680	12	0.018	0.083	GO:1901136	BP	3	carbohydrate derivative catabolic process	5	SAMHD1,OGG1,SDC1,SDC4,MGAT1,GNS,HGSNAT,CHID1,ENTPD4,NUDT16,HEXA,APOBEC3C
1		1	32	680	2	0.003	0.062	GO:0006040	BP	3	amino sugar metabolic process	5	MGAT1,CHID1
1		1	17	680	1	0.001	0.059	GO:1901071	BP	3	glucosamine-containing compound metabolic process	6	CHID1
1		1	10	680	2	0.003	0.2	GO:0046348	BP	3	amino sugar catabolic process	6	MGAT1,CHID1
1		1	6	680	1	0.001	0.167	GO:1901072	BP	3	glucosamine-containing compound catabolic process	7	CHID1
1		1	120	680	9	0.013	0.075	GO:1901657	BP	3	glycosyl compound metabolic process	5	OARD1,UCK1,PDCL,PRPS1,AK3,TYW5,ENTPD4,OPA1,APOBEC3C
1		1	29	680	2	0.003	0.069	GO:1901658	BP	3	glycosyl compound catabolic process	6	ENTPD4,APOBEC3C
1		1	589	680	36	0.053	0.061	GO:1901137	BP	3	carbohydrate derivative biosynthetic process	5	DPM1,SLC25A13,ADSS,LMAN1,PIGH,TUSC3,PIGL,SDC1,CHPF,SDC4,PANK2,UCK1,MGAT1,RFK,UGGT1,PDCL,PHLDA1,GALNT2,PARP1,OGT,PRPS1,PINK1,GART,TYW5,POGLUT1,PIGX,VCP,NDST2,STAT3,B3GALNT1,B3GALT6,EXT1,BACE2,TRAK1,OSTC,HEXA
1		1	41	680	3	0.004	0.073	GO:1901659	BP	3	glycosyl compound biosynthetic process	6	UCK1,PDCL,TYW5
1		1	1055	680	49	0.072	0.046	GO:0006629	BP	3	lipid metabolic process	4	DPM1,PI4K2B,DKK3,NFYC,RAB7A,CRLS1,ECHDC1,CRAT,SCD,SLC25A17,PIGH,CDS2,LONP2,IMPAD1,PIGL,LTA4H,HDLBP,ID2,SDC1,OSBPL9,RAB14,KDSR,ACAT2,SDC4,INSIG2,PANK2,SLC44A2,HSD17B4,CEPT1,PDGFRA,GOLM1,TEX2,HADHB,APP,CERS2,ARF1,AUH,TMEM55A,SAMD8,PEX13,POGLUT1,PIGX,B3GALNT1,CTDNEP1,PTPN11,SLC35C1,PSAP,ADH5,HEXA
1		1	101	680	8	0.012	0.079	GO:1903509	BP	3	liposaccharide metabolic process	5	DPM1,PIGH,PIGL,POGLUT1,PIGX,B3GALNT1,PSAP,HEXA
1		1	232	680	11	0.016	0.047	GO:0008202	BP	3	steroid metabolic process	5	DKK3,NFYC,SCD,HDLBP,OSBPL9,ACAT2,INSIG2,PANK2,HSD17B4,PDGFRA,APP
1		1	17	680	1	0.001	0.059	GO:0008211	BP	3	glucocorticoid metabolic process	6	DKK3
1		1	126	680	6	0.009	0.048	GO:0016125	BP	3	sterol metabolic process	6	NFYC,SCD,HDLBP,ACAT2,INSIG2,APP
1		1	536	680	23	0.034	0.043	GO:0008610	BP	3	lipid biosynthetic process	5	DPM1,PI4K2B,DKK3,NFYC,CRLS1,SCD,PIGH,CDS2,PIGL,OSBPL9,RAB14,KDSR,ACAT2,INSIG2,SLC44A2,HSD17B4,CEPT1,CERS2,ARF1,SAMD8,PIGX,CTDNEP1,PTPN11
1		1	144	680	7	0.01	0.049	GO:0006694	BP	3	steroid biosynthetic process	6	DKK3,NFYC,SCD,OSBPL9,ACAT2,INSIG2,HSD17B4
1		1	10	680	1	0.001	0.1	GO:0006704	BP	3	glucocorticoid biosynthetic process	7	DKK3
1		1	66	680	4	0.006	0.061	GO:0016126	BP	3	sterol biosynthetic process	7	NFYC,SCD,ACAT2,INSIG2
1		1	218	680	10	0.015	0.046	GO:0016042	BP	3	lipid catabolic process	5	RAB7A,ECHDC1,CRAT,SLC25A17,LONP2,ACAT2,HSD17B4,HADHB,AUH,PEX13
1		1	450	680	20	0.029	0.044	GO:0005975	BP	3	carbohydrate metabolic process	4	SLC25A13,SLC2A3,SLC35A2,IMPAD1,GBE1,GLT8D2,NLN,NUP214,MGAT1,NUP54,OGT,STAT3,B3GALNT1,CHID1,EXT1,PPP1R2,PPP1CC,WDR5,HEXA,FPGT
1		1	40	680	1	0.001	0.025	GO:0009311	BP	3	oligosaccharide metabolic process	5	B3GALNT1
1		1	84	680	5	0.007	0.06	GO:0005976	BP	3	polysaccharide metabolic process	5	GBE1,GLT8D2,EXT1,PPP1R2,PPP1CC
1		1	65	680	3	0.004	0.046	GO:0044042	BP	3	glucan metabolic process	6	GBE1,PPP1R2,PPP1CC
1		1	136	680	4	0.006	0.029	GO:0016052	BP	3	carbohydrate catabolic process	5	NUP214,NUP54,OGT,STAT3
1		1	160	680	9	0.013	0.056	GO:0016051	BP	3	carbohydrate biosynthetic process	5	SLC25A13,IMPAD1,GBE1,GLT8D2,NLN,OGT,B3GALNT1,EXT1,WDR5
1		1	10	680	1	0.001	0.1	GO:0009312	BP	3	oligosaccharide biosynthetic process	6	B3GALNT1
1		1	62	680	3	0.004	0.048	GO:0000271	BP	3	polysaccharide biosynthetic process	6	GBE1,GLT8D2,EXT1
1		1	281	680	23	0.034	0.082	GO:0032259	BP	3	methylation	3	NDUFAF7,CIAPIN1,METTL13,METTL1,METTL4,RNMT,ICMT,WDR77,PHF19,PCMT1,TPMT,FBXO11,MBD1,PARP1,OGT,N6AMT1,CHTOP,TYW3,VCP,GATAD2A,RAB3B,CMTR2,WDR5
1		1	1662	680	87	0.128	0.052	GO:0044281	BP	3	small molecule metabolic process	3	DPM1,NDUFAF7,SLC25A13,COX10,COX15,ADSS,DKK3,SLC2A3,NFYC,OXCT1,SEPHS1,ECHDC1,CRAT,SCD,SLC25A17,SAMHD1,SLC35A2,LONP2,IMPAD1,NAMPT,LHPP,PPIF,LTA4H,OGG1,WNT5A,HDLBP,PCYOX1,OSBPL9,KDSR,MTHFD1L,ACAT2,NLN,CHPF,MRS2,OARD1,INSIG2,PANK2,PSMF1,NUP214,UCK1,MCCC2,HSD17B4,RFK,ISCA1,GNS,GLUL,MTHFS,NMT1,PDCL,HADHB,ASNSD1,NUP54,APP,PARP1,PSPH,OGT,PRPS1,ATP6V1B2,AK3,AUH,PTS,PINK1,GART,NDUFV3,PDXK,FLAD1,PEX13,VCP,N…
1		1	298	680	19	0.028	0.064	GO:0044282	BP	3	small molecule catabolic process	4	OXCT1,ECHDC1,CRAT,SLC25A17,LONP2,PCYOX1,ACAT2,MCCC2,HSD17B4,GLUL,MTHFS,HADHB,AUH,PEX13,ENTPD4,ADH5,HIBCH,NUDT16,HEXA
1		1	427	680	26	0.038	0.061	GO:0044283	BP	3	small molecule biosynthetic process	4	SLC25A13,DKK3,NFYC,SEPHS1,SCD,IMPAD1,LTA4H,OSBPL9,MTHFD1L,ACAT2,NLN,INSIG2,HSD17B4,RFK,GLUL,MTHFS,ASNSD1,PSPH,OGT,PRPS1,PTS,GART,PDXK,COQ4,SRR,WDR5
1		1	93	680	9	0.013	0.097	GO:0006766	BP	3	vitamin metabolic process	4	SLC2A3,MTHFD1L,PANK2,MCCC2,RFK,MTHFS,PDXK,FLAD1,BTD
1		1	69	680	9	0.013	0.13	GO:0006767	BP	3	water-soluble vitamin metabolic process	5	SLC2A3,MTHFD1L,PANK2,MCCC2,RFK,MTHFS,PDXK,FLAD1,BTD
1		1	255	680	10	0.015	0.039	GO:0006066	BP	3	alcohol metabolic process	4	DPM1,NFYC,SCD,IMPAD1,HDLBP,ACAT2,INSIG2,APP,PTS,ADH5
1		1	118	680	6	0.009	0.051	GO:1902652	BP	3	secondary alcohol metabolic process	5	NFYC,SCD,HDLBP,ACAT2,INSIG2,APP
1		1	114	680	6	0.009	0.053	GO:0008203	BP	3	cholesterol metabolic process	6	NFYC,SCD,HDLBP,ACAT2,INSIG2,APP
1		1	41	680	1	0.001	0.024	GO:0034308	BP	3	primary alcohol metabolic process	5	ADH5
1		1	12	680	1	0.001	0.083	GO:0006067	BP	3	ethanol metabolic process	6	ADH5
1		1	90	680	2	0.003	0.022	GO:0019751	BP	3	polyol metabolic process	5	IMPAD1,PTS
1		1	15	680	1	0.001	0.067	GO:0034311	BP	3	diol metabolic process	6	PTS
1		1	108	680	6	0.009	0.056	GO:0046165	BP	3	alcohol biosynthetic process	5	NFYC,SCD,IMPAD1,ACAT2,INSIG2,PTS
1		1	62	680	4	0.006	0.065	GO:1902653	BP	3	secondary alcohol biosynthetic process	6	NFYC,SCD,ACAT2,INSIG2
1		1	61	680	4	0.006	0.066	GO:0006695	BP	3	cholesterol biosynthetic process	7	NFYC,SCD,ACAT2,INSIG2
1		1	39	680	2	0.003	0.051	GO:0046173	BP	3	polyol biosynthetic process	6	IMPAD1,PTS
1		1	14	680	1	0.001	0.071	GO:0034312	BP	3	diol biosynthetic process	7	PTS
1		1	205	680	7	0.01	0.034	GO:0005996	BP	3	monosaccharide metabolic process	4	SLC25A13,SLC2A3,SLC35A2,NLN,OGT,WDR5,FPGT
1		1	71	680	4	0.006	0.056	GO:0046364	BP	3	monosaccharide biosynthetic process	5	SLC25A13,NLN,OGT,WDR5
1		1	182	680	6	0.009	0.033	GO:0019318	BP	3	hexose metabolic process	5	SLC25A13,SLC35A2,NLN,OGT,WDR5,FPGT
1		1	148	680	4	0.006	0.027	GO:0006006	BP	3	glucose metabolic process	6	SLC25A13,NLN,OGT,WDR5
1		1	11	680	1	0.001	0.091	GO:0006004	BP	3	fucose metabolic process	6	FPGT
1		1	12	680	1	0.001	0.083	GO:0006012	BP	3	galactose metabolic process	6	SLC35A2
1		1	65	680	4	0.006	0.062	GO:0019319	BP	3	hexose biosynthetic process	6	SLC25A13,NLN,OGT,WDR5
1		1	62	680	4	0.006	0.065	GO:0006094	BP	3	gluconeogenesis	7	SLC25A13,NLN,OGT,WDR5
1		1	144	680	5	0.007	0.035	GO:0097164	BP	3	ammonium ion metabolic process	4	CRAT,KDSR,SLC44A2,CEPT1,SAMD8
1		1	57	680	2	0.003	0.035	GO:2001057	BP	3	reactive nitrogen species metabolic process	4	KHSRP,SMAD3
1		1	1589	680	111	0.163	0.07	GO:1901566	BP	3	organonitrogen compound biosynthetic process	5	DPM1,SLC25A13,COX10,COX15,ADSS,MRPS10,EIF2AK2,DDX3Y,LMAN1,MKNK1,SEPHS1,KHSRP,CIRBP,POLDIP3,RPL3,PIGH,POLR2C,MTFMT,TUSC3,NAMPT,LARP4B,PIGL,NCBP2,SDC1,TIA1,RPL22,KDSR,MTHFD1L,KHDRBS1,RECK,CHPF,SDC4,SOX4,CNOT1,PANK2,RRBP1,HNRNPR,NUP214,ZFP36,SLC44A2,UCK1,EIF2S3,MGAT1,PTCD3,MRPL35,EIF2S1,CEPT1,RFK,GLUL,MTHFS,NMT1,UGGT1,PDCL,ASNSD1,NUP54,PPP3CA,PHLDA1,APP,CERS2,GALNT2,PARP1,EIF2B5,RPL7L1,PSPH,OGT,PRPS…
1		1	37	680	3	0.004	0.081	GO:0042398	BP	3	cellular modified amino acid biosynthetic process	6	MTHFD1L,MTHFS,GART
1		1	2	680	1	0.001	0.5	GO:0031590	BP	3	wybutosine metabolic process	5	TYW5
1		1	126	680	11	0.016	0.087	GO:0006022	BP	3	aminoglycan metabolic process	5	IMPAD1,SDC1,CHPF,SDC4,GNS,HGSNAT,NDST2,B3GALT6,CHID1,EXT1,HEXA
1		1	85	680	7	0.01	0.082	GO:0006023	BP	3	aminoglycan biosynthetic process	6	SDC1,CHPF,SDC4,NDST2,B3GALT6,EXT1,HEXA
1		1	121	680	10	0.015	0.083	GO:0030203	BP	3	glycosaminoglycan metabolic process	6	IMPAD1,SDC1,CHPF,SDC4,GNS,HGSNAT,NDST2,B3GALT6,EXT1,HEXA
1		1	88	680	6	0.009	0.068	GO:1903510	BP	3	mucopolysaccharide metabolic process	7	IMPAD1,CHPF,GNS,NDST2,B3GALT6,HEXA
1		1	84	680	7	0.01	0.083	GO:0006024	BP	3	glycosaminoglycan biosynthetic process	7	SDC1,CHPF,SDC4,NDST2,B3GALT6,EXT1,HEXA
1		1	3	680	1	0.001	0.333	GO:0006030	BP	3	chitin metabolic process	6	CHID1
1		1	104	680	2	0.003	0.019	GO:0009308	BP	3	amine metabolic process	5	PSMF1,OAZ2
1		1	50	680	6	0.009	0.12	GO:0006026	BP	3	aminoglycan catabolic process	6	SDC1,SDC4,GNS,HGSNAT,CHID1,HEXA
1		1	47	680	5	0.007	0.106	GO:0006027	BP	3	glycosaminoglycan catabolic process	7	SDC1,SDC4,GNS,HGSNAT,HEXA
1		1	3	680	1	0.001	0.333	GO:0006032	BP	3	chitin catabolic process	7	CHID1
1		1	17	680	2	0.003	0.118	GO:0042219	BP	3	cellular modified amino acid catabolic process	6	PCYOX1,MTHFS
1		1	141	680	9	0.013	0.064	GO:0042157	BP	3	lipoprotein metabolic process	6	DPM1,PIGH,PIGL,RECK,NMT1,LYPLAL1,ZDHHC7,ZDHHC3,PIGX
1		1	5	680	1	0.001	0.2	GO:1901142	BP	3	insulin metabolic process	6	IDE
1		1	75	680	3	0.004	0.04	GO:0042107	BP	3	cytokine metabolic process	6	WNT5A,TIA1,ZFP36
1		1	11	680	1	0.001	0.091	GO:0050755	BP	3	chemokine metabolic process	7	WNT5A
1		1	1316	680	89	0.131	0.068	GO:0006508	BP	3	proteolysis	6	RNF216,WWTR1,SERPINB1,UBR2,FAS,UBA6,GABARAPL2,ATXN3,RNF126,SART3,UBE2A,UBE2K,HUWE1,NSFL1C,TASP1,USP48,MYH9,DESI1,USP14,LONP2,KCTD10,LTA4H,FAF2,STAM2,PCYOX1,UCHL5,ECE1,VPS4B,IDE,RBBP6,RECK,RNF11,NLN,RNF114,USP22,PSMF1,RBCK1,DDA1,SNX9,PGPEP1,RLIM,TPP2,USP15,TANK,UGGT1,YME1L1,RNF121,FBXO11,APH1B,BBS7,TMTC3,SEC11A,CSNK1D,FOXK2,APP,PARP1,CCNA2,RNF145,RMND5B,GNA12,OGT,USP12,MMP14,SPPL3,PINK1,AMFR,RCHY1…
1		1	49	680	6	0.009	0.122	GO:0033619	BP	3	membrane protein proteolysis	7	MYH9,SNX9,APH1B,SPPL3,BACE2,BACE1
1		1	15	680	1	0.001	0.067	GO:0031293	BP	3	membrane protein intracellular domain proteolysis	8	APH1B
1		1	35	680	4	0.006	0.114	GO:0006509	BP	3	membrane protein ectodomain proteolysis	8	MYH9,SNX9,BACE2,BACE1
1		1	35	680	2	0.003	0.057	GO:0042982	BP	3	amyloid precursor protein metabolic process	6	TMED10,BACE2
1		1	9	680	1	0.001	0.111	GO:0042983	BP	3	amyloid precursor protein biosynthetic process	7	BACE2
1		1	23	680	1	0.001	0.043	GO:0042987	BP	3	amyloid precursor protein catabolic process	7	TMED10
1		1	3202	680	196	0.288	0.061	GO:0036211	BP	3	protein modification process	6	DPM1,NDUFAF7,HCCS,UBE3C,RNF216,UBR7,MAP4K5,WWTR1,UBR2,PHF20,FAS,UBA6,DCUN1D1,EIF2AK2,ATXN3,MAPK6,FSTL3,RNF126,MAP3K13,LMAN1,SART3,UBE2A,UBE2K,MKNK1,STK17B,SEPHS1,HUWE1,BRAP,USP48,PPP2R3C,TRIOBP,PIGH,VRK1,BRMS1L,DOK5,USP14,UBL4A,MTFMT,NBN,TUSC3,VRK3,AKAP8,CEP41,PPP3CB,LHPP,PPIF,PIGL,DUSP3,PRKAR1A,DCUN1D4,RNF141,KCTD10,CHD4,CCNC,PTP4A1,PRPF4B,CLK4,WNT5A,MAPKAPK3,NKTR,STAM2,STK25,ATF2,ICMT,WDR77,DOC…
1		1	240	680	15	0.022	0.062	GO:0051604	BP	3	protein maturation	6	HSCB,MYH9,LONP2,GLRX3,ECE1,SOX4,ISCA1,YME1L1,APH1B,SEC11A,PARP1,MMP14,BACE2,GLRX5,CCBE1
1		1	5	680	3	0.004	0.6	GO:0097428	BP	3	protein maturation by iron-sulfur cluster transfer	7	HSCB,GLRX3,ISCA1
1		1	189	680	10	0.015	0.053	GO:0016485	BP	3	protein processing	7	MYH9,LONP2,ECE1,YME1L1,APH1B,SEC11A,PARP1,MMP14,BACE2,CCBE1
1		1	2	680	1	0.001	0.5	GO:1900756	BP	3	protein processing in phagocytic vesicle	8	MYH9
1		1	32	680	1	0.001	0.031	GO:0031638	BP	3	zymogen activation	8	MMP14
1		1	8	680	1	0.001	0.125	GO:0016540	BP	3	protein autoprocessing	8	PARP1
1		1	2	680	1	0.001	0.5	GO:1901143	BP	3	insulin catabolic process	7	IDE
1		1	8	680	1	0.001	0.125	GO:0042159	BP	3	lipoprotein catabolic process	7	LYPLAL1
1		1	13	680	1	0.001	0.077	GO:1990000	BP	3	amyloid fibril formation	6	APP
1		1	798	680	41	0.06	0.051	GO:0055114	BP	3	oxidation-reduction process	3	SLC25A13,HCCS,COX10,COX15,ECHDC1,CRAT,SCD,SLC25A17,LONP2,GLRX3,GBE1,PCYOX1,MTFR1L,KDSR,PYROXD2,MTHFD1L,ACAT2,PANK2,HSD17B4,HADHB,AUH,AAED1,PINK1,NDUFV3,FLAD1,ALDH16A1,PEX13,TYW5,VCP,HIF1AN,TMX3,PDIA3,PRELID1,MSRB3,GLRX5,PPP1R2,NDUFA6,PPP1CC,BLOC1S2,C20ORF96,ADH5
1		1	9	680	1	0.001	0.111	GO:0006069	BP	3	ethanol oxidation	4	ADH5
1		1	225	680	16	0.024	0.071	GO:0070085	BP	3	glycosylation	3	DPM1,LMAN1,TUSC3,MGAT1,UGGT1,GALNT2,PARP1,OGT,POGLUT1,VCP,B3GALNT1,B3GALT6,SLC35C1,EXT1,TRAK1,OSTC
1		1	28	680	1	0.001	0.036	GO:0097502	BP	3	mannosylation	4	DPM1
1		1	217	680	15	0.022	0.069	GO:0043413	BP	3	macromolecule glycosylation	4	DPM1,LMAN1,TUSC3,MGAT1,UGGT1,GALNT2,PARP1,OGT,POGLUT1,VCP,B3GALNT1,B3GALT6,EXT1,TRAK1,OSTC
1		1	48	680	1	0.001	0.021	GO:0070988	BP	3	demethylation	3	APOBEC3C
1		1	31	680	2	0.003	0.065	GO:0043094	BP	3	cellular metabolic compound salvage	4	UCK1,PDXK
1		1	2603	680	137	0.201	0.053	GO:0006793	BP	3	phosphorus metabolic process	4	DPM1,NDUFAF7,SLC25A13,COX10,MAP4K5,COX15,WWTR1,FAS,ADSS,PI4K2B,EIF2AK2,MAPK6,MAP3K13,UBE2K,MKNK1,STK17B,SEPHS1,CRLS1,BRAP,PPP2R3C,SCD,PIGH,VRK1,PCIF1,DOK5,CDS2,SAMHD1,NBN,IMPAD1,VRK3,AKAP8,NAMPT,PPP3CB,LHPP,PPIF,PIGL,DUSP3,PRKAR1A,KCTD20,CCNC,PTP4A1,PRPF4B,CLK4,OGG1,WNT5A,MAPKAPK3,STK25,DOCK7,RGS4,RAB14,GLIPR2,ACOT9,RAP2C,SDC4,PANK2,PSMF1,NUP214,ZFP36,TWSG1,SLC44A2,SNX9,UCK1,MGAT1,MCCC2,GPS2,PTPR…
1		1	2526	680	132	0.194	0.052	GO:0006796	BP	3	phosphate-containing compound metabolic process	5	DPM1,NDUFAF7,SLC25A13,COX10,MAP4K5,COX15,WWTR1,FAS,ADSS,PI4K2B,EIF2AK2,MAPK6,MAP3K13,UBE2K,MKNK1,STK17B,SEPHS1,CRLS1,BRAP,PPP2R3C,PIGH,VRK1,PCIF1,DOK5,CDS2,SAMHD1,NBN,IMPAD1,VRK3,AKAP8,NAMPT,PPP3CB,LHPP,PPIF,PIGL,DUSP3,PRKAR1A,KCTD20,CCNC,PTP4A1,PRPF4B,CLK4,OGG1,WNT5A,MAPKAPK3,STK25,DOCK7,RGS4,RAB14,GLIPR2,RAP2C,SDC4,PANK2,PSMF1,NUP214,ZFP36,TWSG1,SLC44A2,SNX9,UCK1,MCCC2,GPS2,PTPRA,EIF2S1,CEPT1,P…
1		1	1825	680	90	0.132	0.049	GO:0016310	BP	3	phosphorylation	6	COX10,MAP4K5,COX15,WWTR1,FAS,PI4K2B,EIF2AK2,MAPK6,MAP3K13,UBE2K,MKNK1,STK17B,SEPHS1,BRAP,PPP2R3C,VRK1,DOK5,NBN,IMPAD1,VRK3,AKAP8,PPP3CB,PPIF,DUSP3,PRKAR1A,KCTD20,CCNC,PRPF4B,CLK4,WNT5A,MAPKAPK3,STK25,DOCK7,RGS4,GLIPR2,RAP2C,SDC4,PANK2,PSMF1,NUP214,ZFP36,TWSG1,SNX9,UCK1,GPS2,PTPRA,EIF2S1,PDGFRA,RFK,USP15,NUP54,GIT2,IQGAP1,CSNK1D,BRD4,APP,CCNA2,OGT,PRPS1,AK3,CHEK1,CSNK1G3,IMPACT,NCK1,PINK1,NDUFV3,P…
1		1	336	680	28	0.041	0.083	GO:0016311	BP	3	dephosphorylation	6	PCIF1,IMPAD1,VRK3,PPP3CB,LHPP,DUSP3,PTP4A1,PTPRA,PPP3CA,IQGAP1,RPRD1A,ACP1,PSPH,FARP1,TMEM55A,SPPL3,NCK1,PINK1,SMAD3,PTPN9,CTDSP2,CTDNEP1,ANKLE2,PTPN11,PTP4A2,PPP1R2,PPP1CC,NUDT16
1		1	952	680	50	0.074	0.053	GO:0019637	BP	3	organophosphate metabolic process	5	DPM1,NDUFAF7,SLC25A13,COX10,COX15,ADSS,PI4K2B,CRLS1,PIGH,CDS2,SAMHD1,IMPAD1,NAMPT,LHPP,PPIF,PIGL,OGG1,WNT5A,RAB14,PANK2,NUP214,SLC44A2,UCK1,MCCC2,CEPT1,PDGFRA,RFK,HADHB,NUP54,ARF1,PARP1,OGT,PRPS1,ATP6V1B2,AK3,TMEM55A,SAMD8,PINK1,GART,NDUFV3,PDXK,FLAD1,PIGX,VCP,STAT3,PTPN11,NDUFA6,ENTPD4,NUDT16,OPA1
1		1	512	680	28	0.041	0.055	GO:0090407	BP	3	organophosphate biosynthetic process	6	DPM1,SLC25A13,ADSS,PI4K2B,CRLS1,PIGH,CDS2,NAMPT,LHPP,PIGL,RAB14,PANK2,SLC44A2,UCK1,CEPT1,RFK,ARF1,PARP1,PRPS1,SAMD8,PINK1,GART,PDXK,FLAD1,PIGX,VCP,STAT3,PTPN11
1		1	31	680	3	0.004	0.097	GO:0019692	BP	3	deoxyribose phosphate metabolic process	6	SAMHD1,OGG1,NUDT16
1		1	97	680	5	0.007	0.052	GO:0046434	BP	3	organophosphate catabolic process	6	SAMHD1,OGG1,VCP,ENTPD4,NUDT16
1		1	20	680	3	0.004	0.15	GO:0046386	BP	3	deoxyribose phosphate catabolic process	7	SAMHD1,OGG1,NUDT16
1		1	463	680	28	0.041	0.06	GO:0019693	BP	3	ribose phosphate metabolic process	6	NDUFAF7,SLC25A13,COX10,COX15,ADSS,IMPAD1,PPIF,WNT5A,PANK2,NUP214,UCK1,MCCC2,RFK,NUP54,PARP1,OGT,PRPS1,ATP6V1B2,AK3,PINK1,GART,NDUFV3,VCP,STAT3,NDUFA6,ENTPD4,NUDT16,OPA1
1		1	3	680	1	0.001	0.333	GO:0046391	BP	3	5-phosphoribose 1-diphosphate metabolic process	7	PRPS1
1		1	193	680	11	0.016	0.057	GO:0046390	BP	3	ribose phosphate biosynthetic process	7	SLC25A13,ADSS,PANK2,UCK1,RFK,PARP1,PRPS1,PINK1,GART,VCP,STAT3
1		1	3	680	1	0.001	0.333	GO:0006015	BP	3	5-phosphoribose 1-diphosphate biosynthetic process	8	PRPS1
1		1	6721	680	391	0.575	0.058	GO:0044260	BP	3	cellular macromolecule metabolic process	4	DPM1,NDUFAF7,HCCS,GCFC2,UBE3C,RNF216,PTBP1,UBR7,MAP4K5,SLC30A9,WWTR1,ZFP64,SERPINB1,UBR2,PHF20,KPNA6,FAS,BRD9,UBA6,GABARAPL2,METTL1,TDP1,DCUN1D1,MRPS10,DKK3,EIF2AK2,SNRNP40,MED29,NFYC,ATXN3,DDX3Y,SP100,MAPK6,FSTL3,RNF126,TCF3,MAP3K13,LMAN1,FOSL2,RAB7A,SART3,UBE2A,UBE2K,TULP3,MKNK1,STK17B,KCNK2,DIS3,WBP11,SEPHS1,HUWE1,KHSRP,NSFL1C,TASP1,TBX5,BRAP,DNAJB11,USP48,PPP2R3C,HNRNPH3,CIRBP,TRIOBP,NHP2L1,P…
1		1	227	680	19	0.028	0.084	GO:0043414	BP	3	macromolecule methylation	5	NDUFAF7,METTL1,METTL4,RNMT,ICMT,WDR77,PHF19,PCMT1,FBXO11,MBD1,PARP1,OGT,N6AMT1,CHTOP,VCP,GATAD2A,RAB3B,CMTR2,WDR5
1		1	141	680	4	0.006	0.028	GO:0043112	BP	3	receptor metabolic process	5	ECE1,ARF1,RAB31,HDAC2
1		1	18	680	1	0.001	0.056	GO:0032800	BP	3	receptor biosynthetic process	6	HDAC2
1		1	16	680	1	0.001	0.062	GO:0007220	BP	3	Notch receptor processing	6	APH1B
1		1	7	680	2	0.003	0.286	GO:0030091	BP	3	protein repair	6	PCMT1,MSRB3
1		1	3202	680	196	0.288	0.061	GO:0006464	BP	3	cellular protein modification process	6	DPM1,NDUFAF7,HCCS,UBE3C,RNF216,UBR7,MAP4K5,WWTR1,UBR2,PHF20,FAS,UBA6,DCUN1D1,EIF2AK2,ATXN3,MAPK6,FSTL3,RNF126,MAP3K13,LMAN1,SART3,UBE2A,UBE2K,MKNK1,STK17B,SEPHS1,HUWE1,BRAP,USP48,PPP2R3C,TRIOBP,PIGH,VRK1,BRMS1L,DOK5,USP14,UBL4A,MTFMT,NBN,TUSC3,VRK3,AKAP8,CEP41,PPP3CB,LHPP,PPIF,PIGL,DUSP3,PRKAR1A,DCUN1D4,RNF141,KCTD10,CHD4,CCNC,PTP4A1,PRPF4B,CLK4,WNT5A,MAPKAPK3,NKTR,STAM2,STK25,ATF2,ICMT,WDR77,DOC…
1		1	1	680	1	0.001	1	GO:0017006	BP	3	protein-tetrapyrrole linkage	7	HCCS
1		1	1	680	1	0.001	1	GO:0017003	BP	3	protein-heme linkage	8	HCCS
1		1	1	680	1	0.001	1	GO:0018063	BP	3	cytochrome c-heme linkage	9	HCCS
1		1	9	680	1	0.001	0.111	GO:0017014	BP	3	protein nitrosylation	7	ADH5
1		1	186	680	16	0.024	0.086	GO:0043543	BP	3	protein acylation	7	PHF20,ATF2,DR1,SUPT7L,TAF12,USP22,SOX4,WBP2,NMT1,OGT,CHEK1,ZDHHC7,ZDHHC3,BRD7,WDR5,HDAC2
1		1	159	680	13	0.019	0.082	GO:0006473	BP	3	protein acetylation	8	PHF20,ATF2,DR1,SUPT7L,TAF12,USP22,SOX4,WBP2,OGT,CHEK1,BRD7,WDR5,HDAC2
1		1	138	680	11	0.016	0.08	GO:0006475	BP	3	internal protein amino acid acetylation	9	PHF20,ATF2,DR1,SUPT7L,TAF12,USP22,WBP2,OGT,CHEK1,BRD7,WDR5
1		1	142	680	12	0.018	0.085	GO:0008213	BP	3	protein alkylation	7	NDUFAF7,ICMT,WDR77,PHF19,PCMT1,FBXO11,OGT,N6AMT1,CHTOP,VCP,RAB3B,WDR5
1		1	142	680	12	0.018	0.085	GO:0006479	BP	3	protein methylation	8	NDUFAF7,ICMT,WDR77,PHF19,PCMT1,FBXO11,OGT,N6AMT1,CHTOP,VCP,RAB3B,WDR5
1		1	11	680	1	0.001	0.091	GO:0018065	BP	3	protein-cofactor linkage	7	GLRX5
1		1	960	680	66	0.097	0.069	GO:0070647	BP	3	protein modification by small protein conjugation or removal	7	UBE3C,RNF216,UBR7,WWTR1,UBR2,UBA6,DCUN1D1,ATXN3,RNF126,SART3,UBE2A,UBE2K,HUWE1,BRAP,USP48,USP14,DCUN1D4,RNF141,KCTD10,STAM2,UCHL5,RBBP6,DCAF10,RNF11,RNF114,USP22,SOX4,PSMF1,RBCK1,NUP214,RLIM,NDFIP1,MED10,TPP2,USP15,LMO7,DCAF7,TANK,RNF121,FBXO11,NUP54,FOXK2,DCAF6,CCNA2,RNF145,RMND5B,HDAC8,OGT,UBE3B,USP12,PINK1,AMFR,ZER1,RCHY1,VCP,ARIH1,SMAD3,FBXO22,SOCS6,KBTBD2,ASXL1,SPSB1,UBE2H,TRIM27,TMEM189,GPR…
1		1	803	680	53	0.078	0.066	GO:0032446	BP	3	protein modification by small protein conjugation	8	UBE3C,RNF216,UBR7,WWTR1,UBR2,UBA6,DCUN1D1,RNF126,UBE2A,UBE2K,HUWE1,BRAP,DCUN1D4,RNF141,KCTD10,RBBP6,DCAF10,RNF11,RNF114,USP22,SOX4,PSMF1,RBCK1,NUP214,RLIM,NDFIP1,MED10,TPP2,LMO7,DCAF7,RNF121,FBXO11,NUP54,DCAF6,RNF145,RMND5B,HDAC8,OGT,UBE3B,PINK1,AMFR,ZER1,RCHY1,VCP,ARIH1,FBXO22,SOCS6,KBTBD2,SPSB1,UBE2H,TRIM27,TMEM189,GPR75-ASB3
1		1	721	680	51	0.075	0.071	GO:0016567	BP	3	protein ubiquitination	9	UBE3C,RNF216,UBR7,WWTR1,UBR2,UBA6,DCUN1D1,RNF126,UBE2A,UBE2K,HUWE1,BRAP,DCUN1D4,RNF141,KCTD10,RBBP6,DCAF10,RNF11,RNF114,USP22,SOX4,PSMF1,RBCK1,RLIM,NDFIP1,MED10,TPP2,LMO7,DCAF7,RNF121,FBXO11,DCAF6,RNF145,RMND5B,HDAC8,OGT,UBE3B,PINK1,AMFR,ZER1,RCHY1,VCP,ARIH1,FBXO22,SOCS6,KBTBD2,SPSB1,UBE2H,TRIM27,TMEM189,GPR75-ASB3
1		1	56	680	2	0.003	0.036	GO:0006513	BP	3	protein monoubiquitination	10	RNF126,HUWE1
1		1	268	680	22	0.032	0.082	GO:0000209	BP	3	protein polyubiquitination	10	UBE3C,RNF216,UBR2,RNF126,UBE2A,UBE2K,HUWE1,RBBP6,RNF114,PSMF1,RBCK1,RLIM,TPP2,LMO7,FBXO11,RNF145,AMFR,ARIH1,FBXO22,SPSB1,UBE2H,TRIM27
1		1	5	680	1	0.001	0.2	GO:0097039	BP	3	protein linear polyubiquitination	11	RBCK1
1		1	28	680	2	0.003	0.071	GO:0070979	BP	3	protein K11-linked ubiquitination	11	UBE2A,UBE2H
1		1	47	680	6	0.009	0.128	GO:0070936	BP	3	protein K48-linked ubiquitination	11	RNF216,RNF126,UBE2A,UBE2K,AMFR,UBE2H
1		1	38	680	2	0.003	0.053	GO:0070534	BP	3	protein K63-linked ubiquitination	11	RNF126,TRIM27
1		1	49	680	4	0.006	0.082	GO:0051865	BP	3	protein autoubiquitination	10	UBE2A,RNF141,RNF11,AMFR
1		1	15	680	2	0.003	0.133	GO:0045116	BP	3	protein neddylation	9	DCUN1D1,DCUN1D4
1		1	259	680	17	0.025	0.066	GO:0070646	BP	3	protein modification by small protein removal	8	ATXN3,SART3,USP48,USP14,STAM2,UCHL5,USP22,PSMF1,USP15,TANK,FOXK2,CCNA2,OGT,USP12,VCP,SMAD3,ASXL1
1		1	244	680	17	0.025	0.07	GO:0016579	BP	3	protein deubiquitination	9	ATXN3,SART3,USP48,USP14,STAM2,UCHL5,USP22,PSMF1,USP15,TANK,FOXK2,CCNA2,OGT,USP12,VCP,SMAD3,ASXL1
1		1	9	680	3	0.004	0.333	GO:0035520	BP	3	monoubiquitinated protein deubiquitination	10	ATXN3,USP15,ASXL1
1		1	22	680	1	0.001	0.045	GO:0071108	BP	3	protein K48-linked deubiquitination	10	ATXN3
1		1	25	680	2	0.003	0.08	GO:0070536	BP	3	protein K63-linked deubiquitination	10	ATXN3,VCP
1		1	96	680	8	0.012	0.083	GO:0035601	BP	3	protein deacylation	7	BRMS1L,AKAP8,CHD4,LYPLAL1,HDAC8,PINK1,CHD3,HDAC2
1		1	92	680	7	0.01	0.076	GO:0006476	BP	3	protein deacetylation	8	BRMS1L,AKAP8,CHD4,HDAC8,PINK1,CHD3,HDAC2
1		1	4	680	1	0.001	0.25	GO:0002084	BP	3	protein depalmitoylation	8	LYPLAL1
1		1	24	680	2	0.003	0.083	GO:0031365	BP	3	N-terminal protein amino acid modification	7	SOX4,NMT1
1		1	15	680	1	0.001	0.067	GO:0006474	BP	3	N-terminal protein amino acid acetylation	8	SOX4
1		1	349	680	21	0.031	0.06	GO:0043687	BP	3	post-translational protein modification	7	DCUN1D1,FSTL3,ICMT,RECK,DCAF10,OBSL1,PSMF1,DDA1,GOLM1,LAMC1,LMO7,DCAF7,FBXO11,APP,DCAF6,TGOLN2,FBXO22,SOCS6,SPSB1,PTP4A2,WDR5
1		1	47	680	2	0.003	0.043	GO:0018410	BP	3	C-terminal protein amino acid modification	8	ICMT,RECK
1		1	2	680	1	0.001	0.5	GO:0006481	BP	3	C-terminal protein methylation	9	ICMT
1		1	976	680	60	0.088	0.061	GO:0018193	BP	3	peptidyl-amino acid modification	7	DPM1,NDUFAF7,PHF20,EIF2AK2,LMAN1,UBE2K,MKNK1,VRK1,TUSC3,VRK3,CEP41,PPIF,CLK4,WNT5A,MAPKAPK3,NKTR,ATF2,WDR77,DOCK7,DR1,PHF19,SUPT7L,TAF12,RAP2C,USP22,SOX4,NUP214,WBP2,PDGFRA,NMT1,UGGT1,FBXO11,NUP54,IQGAP1,CSNK1D,APP,GALNT2,PARP1,OGT,CHEK1,CSNK1G3,ZDHHC7,NCK1,PINK1,DDR2,POGLUT1,VCP,HIF1AN,BRD7,TMX3,STAT3,RAB3B,GLRX5,WDR5,HDAC2,ADH5,OSTC,TRIM27,FGFR1OP,CUX1
1		1	17	680	3	0.004	0.176	GO:0018195	BP	3	peptidyl-arginine modification	8	NDUFAF7,WDR77,FBXO11
1		1	12	680	3	0.004	0.25	GO:0018216	BP	3	peptidyl-arginine methylation	9	NDUFAF7,WDR77,FBXO11
1		1	10	680	3	0.004	0.3	GO:0035246	BP	3	peptidyl-arginine N-methylation	10	NDUFAF7,WDR77,FBXO11
1		1	8	680	1	0.001	0.125	GO:0035247	BP	3	peptidyl-arginine omega-N-methylation	11	NDUFAF7
1		1	3	680	1	0.001	0.333	GO:0019918	BP	3	peptidyl-arginine methylation, to symmetrical-dimethyl arginine	12	NDUFAF7
1		1	240	680	13	0.019	0.054	GO:0018209	BP	3	peptidyl-serine modification	8	MKNK1,VRK1,VRK3,WNT5A,MAPKAPK3,DOCK7,CSNK1D,GALNT2,PARP1,CSNK1G3,NCK1,PINK1,POGLUT1
1		1	24	680	4	0.006	0.167	GO:0018198	BP	3	peptidyl-cysteine modification	8	ZDHHC7,TMX3,RAB3B,ADH5
1		1	6	680	1	0.001	0.167	GO:0018231	BP	3	peptidyl-S-diacylglycerol-L-cysteine biosynthetic process from peptidyl-cysteine	9	ZDHHC7
1		1	9	680	1	0.001	0.111	GO:0018119	BP	3	peptidyl-cysteine S-nitrosylation	9	ADH5
1		1	3	680	1	0.001	0.333	GO:0018125	BP	3	peptidyl-cysteine methylation	9	RAB3B
1		1	3	680	1	0.001	0.333	GO:0018197	BP	3	peptidyl-aspartic acid modification	8	HIF1AN
1		1	8	680	1	0.001	0.125	GO:0018202	BP	3	peptidyl-histidine modification	8	HIF1AN
1		1	3	680	1	0.001	0.333	GO:0018201	BP	3	peptidyl-glycine modification	8	NMT1
1		1	40	680	7	0.01	0.175	GO:0018196	BP	3	peptidyl-asparagine modification	8	DPM1,LMAN1,TUSC3,UGGT1,VCP,HIF1AN,OSTC
1		1	269	680	12	0.018	0.045	GO:0018212	BP	3	peptidyl-tyrosine modification	8	EIF2AK2,CLK4,RAP2C,PDGFRA,IQGAP1,APP,DDR2,STAT3,HDAC2,TRIM27,FGFR1OP,CUX1
1		1	100	680	5	0.007	0.05	GO:0018210	BP	3	peptidyl-threonine modification	8	UBE2K,VRK1,WNT5A,GALNT2,CHEK1
1		1	332	680	17	0.025	0.051	GO:0018205	BP	3	peptidyl-lysine modification	8	PHF20,ATF2,DR1,PHF19,SUPT7L,TAF12,USP22,SOX4,NUP214,WBP2,NUP54,OGT,CHEK1,BRD7,GLRX5,WDR5,HDAC2
1		1	86	680	2	0.003	0.023	GO:0016925	BP	3	protein sumoylation	9	NUP214,NUP54
1		1	140	680	13	0.019	0.093	GO:0018394	BP	3	peptidyl-lysine acetylation	9	PHF20,ATF2,DR1,SUPT7L,TAF12,USP22,SOX4,WBP2,OGT,CHEK1,BRD7,WDR5,HDAC2
1		1	134	680	11	0.016	0.082	GO:0018393	BP	3	internal peptidyl-lysine acetylation	10	PHF20,ATF2,DR1,SUPT7L,TAF12,USP22,WBP2,OGT,CHEK1,BRD7,WDR5
1		1	4	680	1	0.001	0.25	GO:0018076	BP	3	N-terminal peptidyl-lysine acetylation	10	SOX4
1		1	7	680	1	0.001	0.143	GO:0009249	BP	3	protein lipoylation	9	GLRX5
1		1	92	680	3	0.004	0.033	GO:0018022	BP	3	peptidyl-lysine methylation	9	PHF19,OGT,WDR5
1		1	32	680	1	0.001	0.031	GO:0018023	BP	3	peptidyl-lysine trimethylation	10	OGT
1		1	21	680	1	0.001	0.048	GO:0018200	BP	3	peptidyl-glutamic acid modification	8	CEP41
1		1	8	680	1	0.001	0.125	GO:0018095	BP	3	protein polyglutamylation	9	CEP41
1		1	46	680	2	0.003	0.043	GO:0018208	BP	3	peptidyl-proline modification	8	PPIF,NKTR
1		1	35	680	2	0.003	0.057	GO:0000413	BP	3	protein peptidyl-prolyl isomerization	9	PPIF,NKTR
1		1	19	680	1	0.001	0.053	GO:0018126	BP	3	protein hydroxylation	7	HIF1AN
1		1	1	680	1	0.001	1	GO:0042265	BP	3	peptidyl-asparagine hydroxylation	8	HIF1AN
1		1	1	680	1	0.001	1	GO:0036138	BP	3	peptidyl-histidine hydroxylation	8	HIF1AN
1		1	2	680	1	0.001	0.5	GO:0042264	BP	3	peptidyl-aspartic acid hydroxylation	8	HIF1AN
1		1	8	680	1	0.001	0.125	GO:0018158	BP	3	protein oxidation	7	TMX3
1		1	3	680	1	0.001	0.333	GO:0018171	BP	3	peptidyl-cysteine oxidation	8	TMX3
1		1	1477	680	69	0.101	0.047	GO:0006468	BP	3	protein phosphorylation	7	MAP4K5,WWTR1,FAS,EIF2AK2,MAPK6,MAP3K13,UBE2K,MKNK1,STK17B,BRAP,PPP2R3C,VRK1,DOK5,NBN,VRK3,AKAP8,PPP3CB,DUSP3,PRKAR1A,CCNC,PRPF4B,CLK4,WNT5A,MAPKAPK3,STK25,DOCK7,RGS4,GLIPR2,RAP2C,SDC4,PSMF1,ZFP36,TWSG1,SNX9,GPS2,PTPRA,EIF2S1,PDGFRA,USP15,IQGAP1,CSNK1D,BRD4,APP,CCNA2,CHEK1,CSNK1G3,IMPACT,NCK1,PINK1,LEMD2,DDR2,PEA15,STAT3,SOCS6,RSRC1,CTDSP2,PTPN11,PRKAR1B,NBR1,HDAC2,GMFB,PSAP,TLK1,TRIM27,FGFR1OP,NR…
1		1	183	680	16	0.024	0.087	GO:0046777	BP	3	protein autophosphorylation	8	EIF2AK2,MAP3K13,MKNK1,STK17B,VRK1,NBN,CLK4,MAPKAPK3,STK25,RAP2C,EIF2S1,PDGFRA,IQGAP1,IMPACT,PINK1,DDR2
1		1	96	680	4	0.006	0.042	GO:0018107	BP	3	peptidyl-threonine phosphorylation	8	UBE2K,VRK1,WNT5A,CHEK1
1		1	267	680	12	0.018	0.045	GO:0018108	BP	3	peptidyl-tyrosine phosphorylation	8	EIF2AK2,CLK4,RAP2C,PDGFRA,IQGAP1,APP,DDR2,STAT3,HDAC2,TRIM27,FGFR1OP,CUX1
1		1	37	680	1	0.001	0.027	GO:0038083	BP	3	peptidyl-tyrosine autophosphorylation	9	IQGAP1
1		1	228	680	10	0.015	0.044	GO:0018105	BP	3	peptidyl-serine phosphorylation	8	MKNK1,VRK1,VRK3,WNT5A,MAPKAPK3,DOCK7,CSNK1D,CSNK1G3,NCK1,PINK1
1		1	6	680	1	0.001	0.167	GO:0036289	BP	3	peptidyl-serine autophosphorylation	9	PINK1
1		1	210	680	20	0.029	0.095	GO:0006470	BP	3	protein dephosphorylation	7	VRK3,PPP3CB,LHPP,DUSP3,PTP4A1,PTPRA,PPP3CA,RPRD1A,ACP1,SPPL3,NCK1,PINK1,PTPN9,CTDSP2,CTDNEP1,ANKLE2,PTPN11,PTP4A2,PPP1R2,PPP1CC
1		1	11	680	1	0.001	0.091	GO:0070262	BP	3	peptidyl-serine dephosphorylation	8	NCK1
1		1	81	680	7	0.01	0.086	GO:0035335	BP	3	peptidyl-tyrosine dephosphorylation	8	DUSP3,PTP4A1,PTPRA,ACP1,PTPN9,PTPN11,PTP4A2
1		1	3	680	1	0.001	0.333	GO:0030047	BP	3	actin modification	7	TRIOBP
1		1	383	680	28	0.041	0.073	GO:0016570	BP	3	histone modification	7	UBR2,PHF20,SART3,UBE2A,HUWE1,VRK1,BRMS1L,AKAP8,CHD4,ATF2,DR1,PHF19,SUPT7L,TAF12,USP22,WBP2,USP15,CCNA2,HDAC8,OGT,CHEK1,PINK1,CHTOP,BRD7,CHD3,ASXL1,WDR5,HDAC2
1		1	33	680	1	0.001	0.03	GO:0061647	BP	3	histone H3-K9 modification	8	CHEK1
1		1	81	680	7	0.01	0.086	GO:0016575	BP	3	histone deacetylation	8	BRMS1L,AKAP8,CHD4,HDAC8,PINK1,CHD3,HDAC2
1		1	20	680	2	0.003	0.1	GO:0070932	BP	3	histone H3 deacetylation	9	HDAC8,HDAC2
1		1	9	680	1	0.001	0.111	GO:0070933	BP	3	histone H4 deacetylation	9	HDAC2
1		1	35	680	4	0.006	0.114	GO:0016574	BP	3	histone ubiquitination	8	UBR2,UBE2A,HUWE1,USP22
1		1	19	680	2	0.003	0.105	GO:0033522	BP	3	histone H2A ubiquitination	9	UBR2,UBE2A
1		1	106	680	4	0.006	0.038	GO:0016571	BP	3	histone methylation	8	PHF19,OGT,CHTOP,WDR5
1		1	86	680	3	0.004	0.035	GO:0034968	BP	3	histone lysine methylation	9	PHF19,OGT,WDR5
1		1	44	680	2	0.003	0.045	GO:0051568	BP	3	histone H3-K4 methylation	10	OGT,WDR5
1		1	14	680	1	0.001	0.071	GO:0080182	BP	3	histone H3-K4 trimethylation	11	OGT
1		1	16	680	2	0.003	0.125	GO:0070734	BP	3	histone H3-K27 methylation	10	PHF19,OGT
1		1	20	680	4	0.006	0.2	GO:0016578	BP	3	histone deubiquitination	8	SART3,USP22,USP15,ASXL1
1		1	4	680	1	0.001	0.25	GO:0035521	BP	3	monoubiquitinated histone deubiquitination	9	ASXL1
1		1	4	680	1	0.001	0.25	GO:0035522	BP	3	monoubiquitinated histone H2A deubiquitination	10	ASXL1
1		1	3	680	1	0.001	0.333	GO:0035616	BP	3	histone H2B conserved C-terminal lysine deubiquitination	9	USP15
1		1	33	680	4	0.006	0.121	GO:0016572	BP	3	histone phosphorylation	8	VRK1,AKAP8,CCNA2,CHEK1
1		1	5	680	2	0.003	0.4	GO:0035405	BP	3	histone-threonine phosphorylation	9	VRK1,CHEK1
1		1	2	680	1	0.001	0.5	GO:0035407	BP	3	histone H3-T11 phosphorylation	10	CHEK1
1		1	1	680	1	0.001	1	GO:0072355	BP	3	histone H3-T3 phosphorylation	10	VRK1
1		1	10	680	1	0.001	0.1	GO:0035404	BP	3	histone-serine phosphorylation	9	VRK1
1		1	4	680	1	0.001	0.25	GO:0043987	BP	3	histone H3-S10 phosphorylation	10	VRK1
1		1	131	680	11	0.016	0.084	GO:0016573	BP	3	histone acetylation	8	PHF20,ATF2,DR1,SUPT7L,TAF12,USP22,WBP2,OGT,CHEK1,BRD7,WDR5
1		1	49	680	6	0.009	0.122	GO:0043966	BP	3	histone H3 acetylation	9	DR1,SUPT7L,TAF12,WBP2,CHEK1,WDR5
1		1	6	680	1	0.001	0.167	GO:0044154	BP	3	histone H3-K14 acetylation	10	WBP2
1		1	10	680	1	0.001	0.1	GO:0043970	BP	3	histone H3-K9 acetylation	10	CHEK1
1		1	56	680	4	0.006	0.071	GO:0043967	BP	3	histone H4 acetylation	9	PHF20,USP22,OGT,WDR5
1		1	13	680	3	0.004	0.231	GO:0043981	BP	3	histone H4-K5 acetylation	10	PHF20,OGT,WDR5
1		1	13	680	3	0.004	0.231	GO:0043982	BP	3	histone H4-K8 acetylation	10	PHF20,OGT,WDR5
1		1	18	680	3	0.004	0.167	GO:0043984	BP	3	histone H4-K16 acetylation	10	PHF20,OGT,WDR5
1		1	11	680	1	0.001	0.091	GO:0034982	BP	3	mitochondrial protein processing	6	YME1L1
1		1	335	680	22	0.032	0.066	GO:0009100	BP	3	glycoprotein metabolic process	5	DPM1,LMAN1,IMPAD1,TUSC3,CHPF,MGAT1,UGGT1,PHLDA1,GALNT2,PARP1,OGT,AMFR,POGLUT1,VCP,NDST2,B3GALNT1,B3GALT6,EXT1,BACE2,TRAK1,OSTC,HEXA
1		1	68	680	6	0.009	0.088	GO:0006029	BP	3	proteoglycan metabolic process	6	IMPAD1,CHPF,NDST2,B3GALT6,EXT1,HEXA
1		1	33	680	2	0.003	0.061	GO:0006517	BP	3	protein deglycosylation	6	UGGT1,AMFR
1		1	23	680	2	0.003	0.087	GO:0036507	BP	3	protein demannosylation	7	UGGT1,AMFR
1		1	23	680	2	0.003	0.087	GO:0036508	BP	3	protein alpha-1,2-demannosylation	8	UGGT1,AMFR
1		1	19	680	2	0.003	0.105	GO:1904380	BP	3	endoplasmic reticulum mannose trimming	9	UGGT1,AMFR
1		1	1753	680	114	0.168	0.065	GO:0044248	BP	3	cellular catabolic process	4	RNF216,WWTR1,UBR2,UBA6,GABARAPL2,ATXN3,RNF126,RAB7A,UBE2A,UBE2K,DIS3,OXCT1,WBP11,HUWE1,KHSRP,NSFL1C,SNX5,USP48,ECHDC1,CRAT,CIRBP,RPL3,SLC25A17,SAMHD1,USP14,LONP2,TBC1D17,KCTD10,LTA4H,MAGOHB,FAF2,OGG1,NCBP2,STAM2,PCYOX1,RPL22,UCHL5,ECE1,VPS4B,IDE,ACAT2,RBBP6,VPS26A,RNF11,RNF114,USP22,CNOT1,PSMF1,RBCK1,HNRNPR,NUP214,ZFP36,DDA1,SNX9,EXOSC2,RLIM,MGAT1,MCCC2,HSD17B4,USP15,GNS,GLUL,MTHFS,CCDC115,UGGT1,…
1		1	5	680	1	0.001	0.2	GO:0009111	BP	3	vitamin catabolic process	5	MTHFS
1		1	1	680	1	0.001	1	GO:0042365	BP	3	water-soluble vitamin catabolic process	6	MTHFS
1		1	427	680	23	0.034	0.054	GO:0006914	BP	3	autophagy	5	GABARAPL2,RAB7A,WBP11,NSFL1C,SNX5,TBC1D17,STAM2,VPS4B,VPS26A,VPS33A,MCL1,ATP6V1B2,VPS26B,LARP1,PINK1,VCP,UBXN6,ATG13,EXOC7,NBR1,PSAP,DYNLL2,LIX1L
1		1	3	680	1	0.001	0.333	GO:0061738	BP	3	late endosomal microautophagy	6	VPS4B
1		1	261	680	19	0.028	0.073	GO:0016236	BP	3	macroautophagy	6	GABARAPL2,RAB7A,NSFL1C,SNX5,STAM2,VPS4B,VPS26A,VPS33A,ATP6V1B2,VPS26B,LARP1,PINK1,VCP,UBXN6,ATG13,EXOC7,NBR1,DYNLL2,LIX1L
1		1	37	680	3	0.004	0.081	GO:0061912	BP	3	selective autophagy	7	RAB7A,PINK1,ATG13
1		1	6	680	1	0.001	0.167	GO:0061724	BP	3	lipophagy	8	RAB7A
1		1	84	680	5	0.007	0.06	GO:1905037	BP	3	autophagosome organization	7	GABARAPL2,RAB7A,NSFL1C,PINK1,ATG13
1		1	82	680	5	0.007	0.061	GO:0000045	BP	3	autophagosome assembly	8	GABARAPL2,RAB7A,NSFL1C,PINK1,ATG13
1		1	33	680	4	0.006	0.121	GO:0097352	BP	3	autophagosome maturation	7	GABARAPL2,VPS33A,VCP,LIX1L
1		1	84	680	4	0.006	0.048	GO:0000422	BP	3	autophagy of mitochondrion	6	GABARAPL2,WBP11,PINK1,ATG13
1		1	18	680	2	0.003	0.111	GO:0000423	BP	3	mitophagy	7	PINK1,ATG13
1		1	521	680	43	0.063	0.083	GO:0043632	BP	3	modification-dependent macromolecule catabolic process	6	RNF216,WWTR1,UBR2,UBA6,ATXN3,RNF126,UBE2A,UBE2K,HUWE1,NSFL1C,USP48,USP14,KCTD10,FAF2,PCYOX1,UCHL5,VPS4B,RBBP6,RNF11,RNF114,USP22,PSMF1,RBCK1,DDA1,EXOSC2,RLIM,USP15,RNF121,FBXO11,BBS7,CSNK1D,RNF145,RMND5B,GNA12,USP12,PINK1,AMFR,RCHY1,UBAP1,VCP,ARIH1,FBXO22,UBE2H
1		1	11	680	1	0.001	0.091	GO:0007039	BP	3	protein catabolic process in the vacuole	7	CCDC115
1		1	7	680	1	0.001	0.143	GO:1905146	BP	3	lysosomal protein catabolic process	8	CCDC115
1		1	5	680	1	0.001	0.2	GO:0090611	BP	3	ubiquitin-independent protein catabolic process via the multivesicular body sorting pathway	8	VPS4B
1		1	403	680	37	0.054	0.092	GO:0010498	BP	3	proteasomal protein catabolic process	8	RNF216,WWTR1,UBR2,GABARAPL2,ATXN3,RNF126,UBE2A,UBE2K,NSFL1C,USP14,KCTD10,FAF2,UCHL5,RNF11,RNF114,PSMF1,RBCK1,DDA1,RLIM,UGGT1,RNF121,BBS7,TMTC3,CSNK1D,RNF145,RMND5B,GNA12,PINK1,AMFR,RCHY1,VCP,ARIH1,FBXO22,UBXN6,SOCS6,UBE2H,GET4
1		1	25	680	6	0.009	0.24	GO:0006515	BP	3	protein quality control for misfolded or incompletely synthesized proteins	8	ATXN3,RNF126,LONP2,UGGT1,YME1L1,VCP
1		1	513	680	42	0.062	0.082	GO:0019941	BP	3	modification-dependent protein catabolic process	8	RNF216,WWTR1,UBR2,UBA6,ATXN3,RNF126,UBE2A,UBE2K,HUWE1,NSFL1C,USP48,USP14,KCTD10,FAF2,PCYOX1,UCHL5,VPS4B,RBBP6,RNF11,RNF114,USP22,PSMF1,RBCK1,DDA1,RLIM,USP15,RNF121,FBXO11,BBS7,CSNK1D,RNF145,RMND5B,GNA12,USP12,PINK1,AMFR,RCHY1,UBAP1,VCP,ARIH1,FBXO22,UBE2H
1		1	3	680	1	0.001	0.333	GO:0030327	BP	3	prenylated protein catabolic process	9	PCYOX1
1		1	507	680	41	0.06	0.081	GO:0006511	BP	3	ubiquitin-dependent protein catabolic process	9	RNF216,WWTR1,UBR2,UBA6,ATXN3,RNF126,UBE2A,UBE2K,HUWE1,NSFL1C,USP48,USP14,KCTD10,FAF2,UCHL5,VPS4B,RBBP6,RNF11,RNF114,USP22,PSMF1,RBCK1,DDA1,RLIM,USP15,RNF121,FBXO11,BBS7,CSNK1D,RNF145,RMND5B,GNA12,USP12,PINK1,AMFR,RCHY1,UBAP1,VCP,ARIH1,FBXO22,UBE2H
1		1	18	680	3	0.004	0.167	GO:0043162	BP	3	ubiquitin-dependent protein catabolic process via the multivesicular body sorting pathway	10	RNF126,VPS4B,UBAP1
1		1	358	680	29	0.043	0.081	GO:0043161	BP	3	proteasome-mediated ubiquitin-dependent protein catabolic process	10	RNF216,WWTR1,UBR2,ATXN3,RNF126,UBE2A,UBE2K,NSFL1C,USP14,KCTD10,FAF2,RNF11,RNF114,PSMF1,RBCK1,DDA1,RLIM,RNF121,BBS7,CSNK1D,RNF145,RMND5B,GNA12,AMFR,RCHY1,VCP,ARIH1,FBXO22,UBE2H
1		1	3	680	1	0.001	0.333	GO:0071596	BP	3	ubiquitin-dependent protein catabolic process via the N-end rule pathway	11	UBR2
1		1	69	680	2	0.003	0.029	GO:0031146	BP	3	SCF-dependent proteasomal ubiquitin-dependent protein catabolic process	11	WWTR1,PSMF1
1		1	77	680	1	0.001	0.013	GO:0031145	BP	3	anaphase-promoting complex-dependent catabolic process	11	PSMF1
1		1	199	680	12	0.018	0.06	GO:0042787	BP	3	protein ubiquitination involved in ubiquitin-dependent protein catabolic process	10	UBA6,RNF126,HUWE1,RBBP6,RNF11,PSMF1,RNF145,RMND5B,AMFR,RCHY1,ARIH1,FBXO22
1		1	4	680	1	0.001	0.25	GO:0035694	BP	3	mitochondrial protein catabolic process	7	YME1L1
1		1	4851	680	255	0.375	0.053	GO:0046483	BP	3	heterocycle metabolic process	4	DPM1,NDUFAF7,SLC25A13,GCFC2,COX10,PTBP1,SLC30A9,COX15,WWTR1,ZFP64,UBR2,PHF20,KPNA6,BRD9,ADSS,METTL1,TDP1,DKK3,EIF2AK2,SNRNP40,MED29,NFYC,ATXN3,DDX3Y,SP100,FSTL3,TCF3,MAP3K13,FOSL2,SART3,UBE2A,TULP3,KCNK2,DIS3,WBP11,HUWE1,KHSRP,TASP1,TBX5,DNAJB11,HNRNPH3,CIRBP,NHP2L1,POLDIP3,RPL3,RBFOX2,POLR3H,BRMS1L,SAMHD1,METTL4,RNMT,SMARCA1,POLR2C,ZNF174,MTFMT,NBN,IMPAD1,INTS10,AKAP8,HNRNPUL1,NAMPT,TLE4,PPP3CB,…
1		1	476	680	28	0.041	0.059	GO:0046700	BP	3	heterocycle catabolic process	5	DIS3,KHSRP,CIRBP,RPL3,SAMHD1,MAGOHB,OGG1,NCBP2,RPL22,CNOT1,PSMF1,HNRNPR,NUP214,ZFP36,EXOSC2,MGAT1,MTHFS,LARP1,CNOT8,PAPD4,VCP,RPSA,EDC3,YTHDF3,RPL14,ENTPD4,NUDT16,APOBEC3C
1		1	4867	680	255	0.375	0.052	GO:0006725	BP	3	cellular aromatic compound metabolic process	4	DPM1,NDUFAF7,SLC25A13,GCFC2,COX10,PTBP1,SLC30A9,COX15,WWTR1,ZFP64,UBR2,PHF20,KPNA6,BRD9,ADSS,METTL1,TDP1,DKK3,EIF2AK2,SNRNP40,MED29,NFYC,ATXN3,DDX3Y,SP100,FSTL3,TCF3,MAP3K13,FOSL2,SART3,UBE2A,TULP3,KCNK2,DIS3,WBP11,HUWE1,KHSRP,TASP1,TBX5,DNAJB11,HNRNPH3,CIRBP,NHP2L1,POLDIP3,RPL3,RBFOX2,POLR3H,BRMS1L,SAMHD1,METTL4,RNMT,SMARCA1,POLR2C,ZNF174,MTFMT,NBN,IMPAD1,INTS10,AKAP8,HNRNPUL1,NAMPT,TLE4,PPP3CB,…
1		1	10	680	1	0.001	0.1	GO:0042537	BP	3	benzene-containing compound metabolic process	5	GSTM4
1		1	2	680	1	0.001	0.5	GO:0018916	BP	3	nitrobenzene metabolic process	6	GSTM4
1		1	46	680	2	0.003	0.043	GO:0033013	BP	3	tetrapyrrole metabolic process	5	COX10,COX15
1		1	486	680	28	0.041	0.058	GO:0019439	BP	3	aromatic compound catabolic process	5	DIS3,KHSRP,CIRBP,RPL3,SAMHD1,MAGOHB,OGG1,NCBP2,RPL22,CNOT1,PSMF1,HNRNPR,NUP214,ZFP36,EXOSC2,MGAT1,MTHFS,LARP1,CNOT8,PAPD4,VCP,RPSA,EDC3,YTHDF3,RPL14,ENTPD4,NUDT16,APOBEC3C
1		1	54	680	1	0.001	0.019	GO:0018958	BP	3	phenol-containing compound metabolic process	5	WNT5A
1		1	12	680	1	0.001	0.083	GO:0006582	BP	3	melanin metabolic process	6	WNT5A
1		1	29	680	4	0.006	0.138	GO:0042558	BP	3	pteridine-containing compound metabolic process	5	MTHFD1L,MTHFS,PTS,GART
1		1	353	680	26	0.038	0.074	GO:0051186	BP	3	cofactor metabolic process	4	CIAPIN1,COX10,COX15,SCD,HSCB,NAMPT,GLRX3,MTHFD1L,ACOT9,PANK2,NUP214,MCCC2,HSD17B4,RFK,ISCA1,MTHFS,NUP54,OGT,PTS,GART,PDXK,FLAD1,VCP,COQ4,STAT3,BTD
1		1	297	680	19	0.028	0.064	GO:0006732	BP	3	coenzyme metabolic process	5	SCD,NAMPT,MTHFD1L,ACOT9,PANK2,NUP214,MCCC2,HSD17B4,RFK,MTHFS,NUP54,OGT,PTS,GART,PDXK,FLAD1,VCP,COQ4,STAT3
1		1	153	680	7	0.01	0.046	GO:0006733	BP	3	oxidoreduction coenzyme metabolic process	6	NAMPT,NUP214,NUP54,OGT,VCP,COQ4,STAT3
1		1	7	680	1	0.001	0.143	GO:0046146	BP	3	tetrahydrobiopterin metabolic process	6	PTS
1		1	13	680	2	0.003	0.154	GO:0051187	BP	3	cofactor catabolic process	5	MTHFS,VCP
1		1	8	680	2	0.003	0.25	GO:0009109	BP	3	coenzyme catabolic process	6	MTHFS,VCP
1		1	31	680	2	0.003	0.065	GO:0006778	BP	3	porphyrin-containing compound metabolic process	5	COX10,COX15
1		1	27	680	2	0.003	0.074	GO:0042168	BP	3	heme metabolic process	6	COX10,COX15
1		1	2	680	2	0.003	1	GO:0046160	BP	3	heme a metabolic process	7	COX10,COX15
1		1	1	680	1	0.001	1	GO:0048033	BP	3	heme o metabolic process	7	COX10
1		1	331	680	18	0.026	0.054	GO:0006091	BP	3	generation of precursor metabolites and energy	4	SLC25A13,COX10,COX15,PPIF,GBE1,MTFR1L,PANK2,NUP214,NUP54,OGT,PINK1,NDUFV3,VCP,STAT3,PRELID1,PPP1R2,NDUFA6,PPP1CC
1		1	232	680	13	0.019	0.056	GO:0015980	BP	3	energy derivation by oxidation of organic compounds	5	SLC25A13,COX10,COX15,GBE1,MTFR1L,PANK2,PINK1,NDUFV3,VCP,PRELID1,PPP1R2,NDUFA6,PPP1CC
1		1	73	680	3	0.004	0.041	GO:0006112	BP	3	energy reserve metabolic process	6	GBE1,PPP1R2,PPP1CC
1		1	157	680	10	0.015	0.064	GO:0045333	BP	3	cellular respiration	6	SLC25A13,COX10,COX15,MTFR1L,PANK2,PINK1,NDUFV3,VCP,PRELID1,NDUFA6
1		1	57	680	4	0.006	0.07	GO:0009060	BP	3	aerobic respiration	7	COX10,MTFR1L,PANK2,VCP
1		1	96	680	6	0.009	0.062	GO:0022900	BP	3	electron transport chain	5	SLC25A13,COX10,COX15,PINK1,NDUFV3,NDUFA6
1		1	94	680	6	0.009	0.064	GO:0022904	BP	3	respiratory electron transport chain	6	SLC25A13,COX10,COX15,PINK1,NDUFV3,NDUFA6
1		1	184	680	6	0.009	0.033	GO:0072593	BP	3	reactive oxygen species metabolic process	4	KHSRP,TUSC2,RFK,PINK1,SMAD3,STAT3
1		1	32	680	2	0.003	0.062	GO:0042743	BP	3	hydrogen peroxide metabolic process	5	PINK1,STAT3
1		1	74	680	3	0.004	0.041	GO:1903409	BP	3	reactive oxygen species biosynthetic process	5	KHSRP,SMAD3,STAT3
1		1	56	680	2	0.003	0.036	GO:0046209	BP	3	nitric oxide metabolic process	5	KHSRP,SMAD3
1		1	307	680	18	0.026	0.059	GO:0006790	BP	3	sulfur compound metabolic process	4	CIAPIN1,SCD,HSCB,IMPAD1,GLRX3,PCYOX1,ACOT9,CHPF,MCCC2,HSD17B4,ISCA1,GNS,NDST2,GSTM4,BTD,B3GALT6,EXT1,HEXA
1		1	16	680	1	0.001	0.062	GO:1901685	BP	3	glutathione derivative metabolic process	5	GSTM4
1		1	39	680	3	0.004	0.077	GO:0044273	BP	3	sulfur compound catabolic process	5	PCYOX1,GNS,HEXA
1		1	84	680	3	0.004	0.036	GO:0035383	BP	3	thioester metabolic process	5	SCD,ACOT9,HSD17B4
1		1	84	680	3	0.004	0.036	GO:0006637	BP	3	acyl-CoA metabolic process	6	SCD,ACOT9,HSD17B4
1		1	32	680	2	0.003	0.062	GO:0035337	BP	3	fatty-acyl-CoA metabolic process	7	SCD,HSD17B4
1		1	1	680	1	0.001	1	GO:0036111	BP	3	very long-chain fatty-acyl-CoA metabolic process	8	HSD17B4
1		1	3	680	1	0.001	0.333	GO:0036112	BP	3	medium-chain fatty-acyl-CoA metabolic process	8	HSD17B4
1		1	4954	680	258	0.379	0.052	GO:0044249	BP	3	cellular biosynthetic process	4	DPM1,SLC25A13,CIAPIN1,GCFC2,COX10,SLC30A9,COX15,WWTR1,ZFP64,UBR2,PHF20,KPNA6,BRD9,ADSS,PI4K2B,MRPS10,DKK3,EIF2AK2,MED29,NFYC,ATXN3,DDX3Y,SP100,FSTL3,TCF3,MAP3K13,LMAN1,FOSL2,TULP3,MKNK1,KCNK2,SEPHS1,KHSRP,CRLS1,TASP1,TBX5,SCD,CIRBP,HSCB,POLDIP3,RPL3,RBFOX2,POLR3H,PIGH,BRMS1L,CDS2,RNMT,SMARCA1,POLR2C,ZNF174,MTFMT,NBN,IMPAD1,INTS10,TUSC3,AKAP8,HNRNPUL1,NAMPT,TLE4,PPP3CB,LHPP,LARP4B,GLRX3,RAD51C,PIG…
1		1	158	680	17	0.025	0.108	GO:0051188	BP	3	cofactor biosynthetic process	5	CIAPIN1,COX10,COX15,SCD,HSCB,NAMPT,GLRX3,MTHFD1L,PANK2,RFK,ISCA1,MTHFS,PTS,GART,PDXK,FLAD1,COQ4
1		1	119	680	11	0.016	0.092	GO:0009108	BP	3	coenzyme biosynthetic process	6	SCD,NAMPT,MTHFD1L,PANK2,RFK,MTHFS,PTS,GART,PDXK,FLAD1,COQ4
1		1	16	680	4	0.006	0.25	GO:0016226	BP	3	iron-sulfur cluster assembly	6	CIAPIN1,HSCB,GLRX3,ISCA1
1		1	2	680	1	0.001	0.5	GO:0044571	BP	3	[2Fe-2S] cluster assembly	7	GLRX3
1		1	3474	680	168	0.247	0.048	GO:0019438	BP	3	aromatic compound biosynthetic process	5	SLC25A13,GCFC2,COX10,SLC30A9,COX15,WWTR1,ZFP64,UBR2,PHF20,KPNA6,BRD9,ADSS,DKK3,EIF2AK2,MED29,NFYC,ATXN3,SP100,FSTL3,TCF3,MAP3K13,FOSL2,TULP3,KCNK2,KHSRP,TASP1,TBX5,POLDIP3,RBFOX2,POLR3H,BRMS1L,RNMT,SMARCA1,POLR2C,ZNF174,NBN,INTS10,AKAP8,HNRNPUL1,NAMPT,TLE4,PPP3CB,LHPP,RAD51C,COL1A1,PRKAR1A,KLF3,RNF141,MAGOHB,CHD4,CCNC,OGG1,WNT5A,NCBP2,COMMD2,GTF3C2,ID2,ATF2,WDR77,IVNS1ABP,UCHL5,PHTF1,DR1,STAG1,PH…
1		1	23	680	1	0.001	0.043	GO:0046189	BP	3	phenol-containing compound biosynthetic process	6	WNT5A
1		1	11	680	1	0.001	0.091	GO:0042438	BP	3	melanin biosynthetic process	7	WNT5A
1		1	3477	680	168	0.247	0.048	GO:0018130	BP	3	heterocycle biosynthetic process	5	SLC25A13,GCFC2,COX10,SLC30A9,COX15,WWTR1,ZFP64,UBR2,PHF20,KPNA6,BRD9,ADSS,DKK3,EIF2AK2,MED29,NFYC,ATXN3,SP100,FSTL3,TCF3,MAP3K13,FOSL2,TULP3,KCNK2,KHSRP,TASP1,TBX5,POLDIP3,RBFOX2,POLR3H,BRMS1L,RNMT,SMARCA1,POLR2C,ZNF174,NBN,INTS10,AKAP8,HNRNPUL1,NAMPT,TLE4,PPP3CB,LHPP,RAD51C,COL1A1,PRKAR1A,KLF3,RNF141,MAGOHB,CHD4,CCNC,OGG1,WNT5A,NCBP2,COMMD2,GTF3C2,ID2,ATF2,WDR77,IVNS1ABP,UCHL5,PHTF1,DR1,STAG1,PH…
1		1	161	680	6	0.009	0.037	GO:0044272	BP	3	sulfur compound biosynthetic process	5	SCD,CHPF,NDST2,GSTM4,B3GALT6,EXT1
1		1	42	680	1	0.001	0.024	GO:0035384	BP	3	thioester biosynthetic process	6	SCD
1		1	42	680	1	0.001	0.024	GO:0071616	BP	3	acyl-CoA biosynthetic process	7	SCD
1		1	24	680	1	0.001	0.042	GO:0046949	BP	3	fatty-acyl-CoA biosynthetic process	8	SCD
1		1	16	680	1	0.001	0.062	GO:1901687	BP	3	glutathione derivative biosynthetic process	6	GSTM4
1		1	18	680	2	0.003	0.111	GO:0009110	BP	3	vitamin biosynthetic process	5	RFK,PDXK
1		1	9	680	2	0.003	0.222	GO:0042364	BP	3	water-soluble vitamin biosynthetic process	6	RFK,PDXK
1		1	10	680	1	0.001	0.1	GO:0050665	BP	3	hydrogen peroxide biosynthetic process	5	STAT3
1		1	4110	680	212	0.312	0.052	GO:0034645	BP	3	cellular macromolecule biosynthetic process	5	DPM1,GCFC2,SLC30A9,WWTR1,ZFP64,UBR2,PHF20,KPNA6,BRD9,MRPS10,DKK3,EIF2AK2,MED29,NFYC,ATXN3,DDX3Y,SP100,FSTL3,TCF3,MAP3K13,LMAN1,FOSL2,TULP3,MKNK1,KCNK2,KHSRP,TASP1,TBX5,CIRBP,POLDIP3,RPL3,RBFOX2,POLR3H,PIGH,BRMS1L,RNMT,SMARCA1,POLR2C,ZNF174,MTFMT,NBN,INTS10,TUSC3,AKAP8,HNRNPUL1,NAMPT,TLE4,PPP3CB,LARP4B,RAD51C,PIGL,COL1A1,PRKAR1A,KLF3,RNF141,MAGOHB,CHD4,CCNC,RAD1,OGG1,WNT5A,GBE1,NCBP2,COMMD2,GTF3C2…
1		1	115	680	8	0.012	0.07	GO:0042158	BP	3	lipoprotein biosynthetic process	6	DPM1,PIGH,PIGL,RECK,NMT1,ZDHHC7,ZDHHC3,PIGX
1		1	111	680	8	0.012	0.072	GO:0006497	BP	3	protein lipidation	7	DPM1,PIGH,PIGL,RECK,NMT1,ZDHHC7,ZDHHC3,PIGX
1		1	5	680	1	0.001	0.2	GO:0006498	BP	3	N-terminal protein lipidation	8	NMT1
1		1	5	680	1	0.001	0.2	GO:0018377	BP	3	protein myristoylation	8	NMT1
1		1	4	680	1	0.001	0.25	GO:0006499	BP	3	N-terminal protein myristoylation	9	NMT1
1		1	2	680	1	0.001	0.5	GO:0018008	BP	3	N-terminal peptidyl-glycine N-myristoylation	10	NMT1
1		1	21	680	2	0.003	0.095	GO:0018345	BP	3	protein palmitoylation	8	ZDHHC7,ZDHHC3
1		1	6	680	1	0.001	0.167	GO:0018230	BP	3	peptidyl-L-cysteine S-palmitoylation	9	ZDHHC7
1		1	44	680	1	0.001	0.023	GO:0006501	BP	3	C-terminal protein lipidation	8	RECK
1		1	279	680	19	0.028	0.068	GO:0009101	BP	3	glycoprotein biosynthetic process	6	DPM1,LMAN1,TUSC3,CHPF,MGAT1,UGGT1,PHLDA1,GALNT2,PARP1,OGT,POGLUT1,VCP,NDST2,B3GALNT1,B3GALT6,EXT1,BACE2,TRAK1,OSTC
1		1	2	680	1	0.001	0.5	GO:0045210	BP	3	FasL biosynthetic process	7	PHLDA1
1		1	49	680	4	0.006	0.082	GO:0030166	BP	3	proteoglycan biosynthetic process	7	CHPF,NDST2,B3GALT6,EXT1
1		1	217	680	15	0.022	0.069	GO:0006486	BP	3	protein glycosylation	7	DPM1,LMAN1,TUSC3,MGAT1,UGGT1,GALNT2,PARP1,OGT,POGLUT1,VCP,B3GALNT1,B3GALT6,EXT1,TRAK1,OSTC
1		1	24	680	1	0.001	0.042	GO:0006471	BP	3	protein ADP-ribosylation	8	PARP1
1		1	4	680	1	0.001	0.25	GO:0070212	BP	3	protein poly-ADP-ribosylation	9	PARP1
1		1	2	680	1	0.001	0.5	GO:0018312	BP	3	peptidyl-serine ADP-ribosylation	9	PARP1
1		1	64	680	6	0.009	0.094	GO:0006487	BP	3	protein N-linked glycosylation	8	DPM1,LMAN1,TUSC3,UGGT1,VCP,OSTC
1		1	39	680	6	0.009	0.154	GO:0018279	BP	3	protein N-linked glycosylation via asparagine	9	DPM1,LMAN1,TUSC3,UGGT1,VCP,OSTC
1		1	71	680	5	0.007	0.07	GO:0006493	BP	3	protein O-linked glycosylation	8	DPM1,GALNT2,OGT,POGLUT1,TRAK1
1		1	32	680	1	0.001	0.031	GO:0016266	BP	3	O-glycan processing	9	GALNT2
1		1	4	680	2	0.003	0.5	GO:0018242	BP	3	protein O-linked glycosylation via serine	9	GALNT2,POGLUT1
1		1	4	680	1	0.001	0.25	GO:0018243	BP	3	protein O-linked glycosylation via threonine	9	GALNT2
1		1	18	680	1	0.001	0.056	GO:0035268	BP	3	protein mannosylation	8	DPM1
1		1	13	680	1	0.001	0.077	GO:0035269	BP	3	protein O-linked mannosylation	9	DPM1
1		1	23	680	2	0.003	0.087	GO:0006730	BP	3	one-carbon metabolic process	4	MTHFD1L,MTHFS
1		1	5284	680	284	0.418	0.054	GO:0034641	BP	3	cellular nitrogen compound metabolic process	4	DPM1,NDUFAF7,SLC25A13,GCFC2,COX10,PTBP1,SLC30A9,COX15,WWTR1,ZFP64,UBR2,PHF20,KPNA6,BRD9,ADSS,METTL1,TDP1,MRPS10,DKK3,EIF2AK2,SNRNP40,MED29,NFYC,ATXN3,DDX3Y,SP100,FSTL3,TCF3,MAP3K13,FOSL2,SART3,UBE2A,TULP3,MKNK1,KCNK2,DIS3,WBP11,HUWE1,KHSRP,TASP1,TBX5,DNAJB11,CRAT,HNRNPH3,CIRBP,NHP2L1,POLDIP3,RPL3,RBFOX2,POLR3H,BRMS1L,SAMHD1,METTL4,RNMT,SMARCA1,POLR2C,ZNF174,MTFMT,NBN,IMPAD1,INTS10,AKAP8,HNRNPUL1,…
1		1	478	680	28	0.041	0.059	GO:0044270	BP	3	cellular nitrogen compound catabolic process	5	DIS3,KHSRP,CIRBP,RPL3,SAMHD1,MAGOHB,OGG1,NCBP2,RPL22,CNOT1,PSMF1,HNRNPR,NUP214,ZFP36,EXOSC2,MGAT1,MTHFS,LARP1,CNOT8,PAPD4,VCP,RPSA,EDC3,YTHDF3,RPL14,ENTPD4,NUDT16,APOBEC3C
1		1	2	680	1	0.001	0.5	GO:0042560	BP	3	pteridine-containing compound catabolic process	6	MTHFS
1		1	100	680	2	0.003	0.02	GO:0044106	BP	3	cellular amine metabolic process	5	PSMF1,OAZ2
1		1	40	680	1	0.001	0.025	GO:0006576	BP	3	cellular biogenic amine metabolic process	6	OAZ2
1		1	15	680	1	0.001	0.067	GO:0006595	BP	3	polyamine metabolic process	7	OAZ2
1		1	4008	680	204	0.3	0.051	GO:0044271	BP	3	cellular nitrogen compound biosynthetic process	5	SLC25A13,GCFC2,COX10,SLC30A9,COX15,WWTR1,ZFP64,UBR2,PHF20,KPNA6,BRD9,ADSS,MRPS10,DKK3,EIF2AK2,MED29,NFYC,ATXN3,DDX3Y,SP100,FSTL3,TCF3,MAP3K13,FOSL2,TULP3,MKNK1,KCNK2,KHSRP,TASP1,TBX5,CIRBP,POLDIP3,RPL3,RBFOX2,POLR3H,BRMS1L,RNMT,SMARCA1,POLR2C,ZNF174,MTFMT,NBN,INTS10,AKAP8,HNRNPUL1,NAMPT,TLE4,PPP3CB,LHPP,LARP4B,RAD51C,COL1A1,PRKAR1A,KLF3,RNF141,MAGOHB,CHD4,CCNC,OGG1,WNT5A,NCBP2,COMMD2,GTF3C2,ID2,A…
1		1	53	680	2	0.003	0.038	GO:0006809	BP	3	nitric oxide biosynthetic process	6	KHSRP,SMAD3
1		1	15	680	1	0.001	0.067	GO:0009309	BP	3	amine biosynthetic process	6	OAZ2
1		1	15	680	1	0.001	0.067	GO:0042401	BP	3	cellular biogenic amine biosynthetic process	7	OAZ2
1		1	12	680	1	0.001	0.083	GO:0006596	BP	3	polyamine biosynthetic process	8	OAZ2
1		1	27	680	2	0.003	0.074	GO:0033014	BP	3	tetrapyrrole biosynthetic process	6	COX10,COX15
1		1	24	680	2	0.003	0.083	GO:0006779	BP	3	porphyrin-containing compound biosynthetic process	7	COX10,COX15
1		1	21	680	2	0.003	0.095	GO:0006783	BP	3	heme biosynthetic process	8	COX10,COX15
1		1	1	680	1	0.001	1	GO:0048034	BP	3	heme O biosynthetic process	9	COX10
1		1	2	680	2	0.003	1	GO:0006784	BP	3	heme a biosynthetic process	9	COX10,COX15
1		1	13	680	4	0.006	0.308	GO:0042559	BP	3	pteridine-containing compound biosynthetic process	6	MTHFD1L,MTHFS,PTS,GART
1		1	7	680	1	0.001	0.143	GO:0006729	BP	3	tetrahydrobiopterin biosynthetic process	7	PTS
1		1	142	680	7	0.01	0.049	GO:0072524	BP	3	pyridine-containing compound metabolic process	5	NAMPT,NUP214,NUP54,OGT,PDXK,VCP,STAT3
1		1	26	680	2	0.003	0.077	GO:0072525	BP	3	pyridine-containing compound biosynthetic process	6	NAMPT,PDXK
1		1	4	680	1	0.001	0.25	GO:0042816	BP	3	vitamin B6 metabolic process	6	PDXK
1		1	3	680	1	0.001	0.333	GO:0042819	BP	3	vitamin B6 biosynthetic process	7	PDXK
1		1	6	680	3	0.004	0.5	GO:0042726	BP	3	flavin-containing compound metabolic process	5	RFK,FLAD1,VCP
1		1	2	680	2	0.003	1	GO:0042727	BP	3	flavin-containing compound biosynthetic process	6	RFK,FLAD1
1		1	1	680	1	0.001	1	GO:0042728	BP	3	flavin-containing compound catabolic process	6	VCP
1		1	5	680	2	0.003	0.4	GO:0006771	BP	3	riboflavin metabolic process	6	RFK,FLAD1
1		1	1	680	1	0.001	1	GO:0009231	BP	3	riboflavin biosynthetic process	7	RFK
1		1	65	680	6	0.009	0.092	GO:0072527	BP	3	pyrimidine-containing compound metabolic process	5	OGG1,UCK1,PRPS1,AK3,ENTPD4,APOBEC3C
1		1	36	680	2	0.003	0.056	GO:0072528	BP	3	pyrimidine-containing compound biosynthetic process	6	UCK1,PRPS1
1		1	27	680	3	0.004	0.111	GO:0072529	BP	3	pyrimidine-containing compound catabolic process	6	OGG1,ENTPD4,APOBEC3C
1		1	475	680	28	0.041	0.059	GO:0072521	BP	3	purine-containing compound metabolic process	5	NDUFAF7,SLC25A13,COX10,COX15,ADSS,SAMHD1,IMPAD1,PPIF,WNT5A,MTHFD1L,OARD1,PANK2,NUP214,MCCC2,NUP54,PARP1,OGT,PRPS1,ATP6V1B2,AK3,PINK1,GART,NDUFV3,VCP,STAT3,NDUFA6,NUDT16,OPA1
1		1	43	680	2	0.003	0.047	GO:0072523	BP	3	purine-containing compound catabolic process	6	SAMHD1,NUDT16
1		1	194	680	10	0.015	0.052	GO:0072522	BP	3	purine-containing compound biosynthetic process	6	SLC25A13,ADSS,MTHFD1L,PANK2,PARP1,PRPS1,PINK1,GART,VCP,STAT3
1		1	24	680	4	0.006	0.167	GO:0050435	BP	3	amyloid-beta metabolic process	7	IDE,TMED10,BACE2,BACE1
1		1	16	680	1	0.001	0.062	GO:0034205	BP	3	amyloid-beta formation	8	TMED10
1		1	23	680	3	0.004	0.13	GO:0043171	BP	3	peptide catabolic process	7	LTA4H,ECE1,IDE
1		1	4	680	2	0.003	0.5	GO:0010815	BP	3	bradykinin catabolic process	8	ECE1,IDE
1		1	2	680	1	0.001	0.5	GO:0010813	BP	3	neuropeptide catabolic process	8	ECE1
1		1	1	680	1	0.001	1	GO:0010814	BP	3	substance P catabolic process	9	ECE1
1		1	15	680	1	0.001	0.067	GO:0006465	BP	3	signal peptide processing	7	SEC11A
1		1	655	680	53	0.078	0.081	GO:0043043	BP	3	peptide biosynthetic process	7	MRPS10,EIF2AK2,DDX3Y,MKNK1,KHSRP,CIRBP,POLDIP3,RPL3,POLR2C,MTFMT,LARP4B,NCBP2,TIA1,RPL22,KHDRBS1,SOX4,CNOT1,RRBP1,HNRNPR,NUP214,ZFP36,EIF2S3,PTCD3,MRPL35,EIF2S1,NUP54,PPP3CA,APP,EIF2B5,RPL7L1,IMPACT,LARP1,CNOT8,N6AMT1,MRPL17,NCK1,PINK1,MRPS18C,POLR2H,ABCE1,LARP6,SMAD3,RPSA,STAT3,PA2G4,TCEA2,RBM4B,EIF1AD,MRPS23,YTHDF3,RPL14,EIF1AY,DDX3X
1		1	68	680	3	0.004	0.044	GO:0002181	BP	3	cytoplasmic translation	9	RPL22,RPL7L1,NCK1
1		1	124	680	7	0.01	0.056	GO:0006414	BP	3	translational elongation	9	MRPS10,PTCD3,MRPL35,MRPL17,MRPS18C,TCEA2,MRPS23
1		1	117	680	6	0.009	0.051	GO:0032543	BP	3	mitochondrial translation	9	MRPS10,PTCD3,MRPL35,MRPL17,MRPS18C,MRPS23
1		1	82	680	6	0.009	0.073	GO:0070125	BP	3	mitochondrial translational elongation	10	MRPS10,PTCD3,MRPL35,MRPL17,MRPS18C,MRPS23
1		1	97	680	8	0.012	0.082	GO:0006415	BP	3	translational termination	9	MRPS10,PTCD3,MRPL35,N6AMT1,MRPL17,MRPS18C,ABCE1,MRPS23
1		1	84	680	6	0.009	0.071	GO:0070126	BP	3	mitochondrial translational termination	10	MRPS10,PTCD3,MRPL35,MRPL17,MRPS18C,MRPS23
1		1	16	680	1	0.001	0.062	GO:0006577	BP	3	amino-acid betaine metabolic process	5	CRAT
1		1	12	680	1	0.001	0.083	GO:0009437	BP	3	carnitine metabolic process	6	CRAT
1		1	2	680	1	0.001	0.5	GO:0019254	BP	3	carnitine metabolic process, CoA-linked	7	CRAT
1		1	4743	680	251	0.369	0.053	GO:0006139	BP	3	nucleobase-containing compound metabolic process	5	DPM1,NDUFAF7,SLC25A13,GCFC2,COX10,PTBP1,SLC30A9,COX15,WWTR1,ZFP64,UBR2,PHF20,KPNA6,BRD9,ADSS,METTL1,TDP1,DKK3,EIF2AK2,SNRNP40,MED29,NFYC,ATXN3,DDX3Y,SP100,FSTL3,TCF3,MAP3K13,FOSL2,SART3,UBE2A,TULP3,KCNK2,DIS3,WBP11,HUWE1,KHSRP,TASP1,TBX5,DNAJB11,HNRNPH3,CIRBP,NHP2L1,POLDIP3,RPL3,RBFOX2,POLR3H,BRMS1L,SAMHD1,METTL4,RNMT,SMARCA1,POLR2C,ZNF174,MTFMT,NBN,IMPAD1,INTS10,AKAP8,HNRNPUL1,NAMPT,TLE4,PPP3CB,…
1		1	607	680	37	0.054	0.061	GO:0055086	BP	3	nucleobase-containing small molecule metabolic process	6	NDUFAF7,SLC25A13,COX10,COX15,ADSS,SAMHD1,IMPAD1,NAMPT,LHPP,PPIF,OGG1,WNT5A,MTHFD1L,OARD1,PANK2,NUP214,UCK1,MCCC2,RFK,PDCL,NUP54,PARP1,OGT,PRPS1,ATP6V1B2,AK3,PINK1,GART,NDUFV3,FLAD1,VCP,STAT3,NDUFA6,ENTPD4,NUDT16,OPA1,APOBEC3C
1		1	34	680	4	0.006	0.118	GO:0009112	BP	3	nucleobase metabolic process	7	MTHFD1L,UCK1,PRPS1,GART
1		1	17	680	3	0.004	0.176	GO:0046112	BP	3	nucleobase biosynthetic process	8	MTHFD1L,PRPS1,GART
1		1	17	680	1	0.001	0.059	GO:0006206	BP	3	pyrimidine nucleobase metabolic process	8	UCK1
1		1	18	680	3	0.004	0.167	GO:0006144	BP	3	purine nucleobase metabolic process	8	MTHFD1L,PRPS1,GART
1		1	3	680	1	0.001	0.333	GO:0046100	BP	3	hypoxanthine metabolic process	9	PRPS1
1		1	11	680	3	0.004	0.273	GO:0009113	BP	3	purine nucleobase biosynthetic process	9	MTHFD1L,PRPS1,GART
1		1	3	680	1	0.001	0.333	GO:0046101	BP	3	hypoxanthine biosynthetic process	10	PRPS1
1		1	568	680	33	0.049	0.058	GO:0006753	BP	3	nucleoside phosphate metabolic process	7	NDUFAF7,SLC25A13,COX10,COX15,ADSS,SAMHD1,IMPAD1,NAMPT,LHPP,PPIF,OGG1,WNT5A,PANK2,NUP214,UCK1,MCCC2,RFK,NUP54,PARP1,OGT,PRPS1,ATP6V1B2,AK3,PINK1,GART,NDUFV3,FLAD1,VCP,STAT3,NDUFA6,ENTPD4,NUDT16,OPA1
1		1	288	680	22	0.032	0.076	GO:0009123	BP	3	nucleoside monophosphate metabolic process	8	NDUFAF7,SLC25A13,COX10,COX15,ADSS,LHPP,PPIF,NUP214,UCK1,RFK,NUP54,PARP1,OGT,PRPS1,ATP6V1B2,AK3,PINK1,GART,NDUFV3,VCP,STAT3,NDUFA6
1		1	267	680	20	0.029	0.075	GO:0009126	BP	3	purine nucleoside monophosphate metabolic process	9	NDUFAF7,SLC25A13,COX10,COX15,ADSS,LHPP,PPIF,NUP214,NUP54,PARP1,OGT,PRPS1,ATP6V1B2,AK3,PINK1,GART,NDUFV3,VCP,STAT3,NDUFA6
1		1	277	680	22	0.032	0.079	GO:0009161	BP	3	ribonucleoside monophosphate metabolic process	9	NDUFAF7,SLC25A13,COX10,COX15,ADSS,LHPP,PPIF,NUP214,UCK1,RFK,NUP54,PARP1,OGT,PRPS1,ATP6V1B2,AK3,PINK1,GART,NDUFV3,VCP,STAT3,NDUFA6
1		1	267	680	20	0.029	0.075	GO:0009167	BP	3	purine ribonucleoside monophosphate metabolic process	10	NDUFAF7,SLC25A13,COX10,COX15,ADSS,LHPP,PPIF,NUP214,NUP54,PARP1,OGT,PRPS1,ATP6V1B2,AK3,PINK1,GART,NDUFV3,VCP,STAT3,NDUFA6
1		1	14	680	1	0.001	0.071	GO:0009129	BP	3	pyrimidine nucleoside monophosphate metabolic process	9	UCK1
1		1	9	680	1	0.001	0.111	GO:0009173	BP	3	pyrimidine ribonucleoside monophosphate metabolic process	10	UCK1
1		1	277	680	20	0.029	0.072	GO:0009141	BP	3	nucleoside triphosphate metabolic process	8	NDUFAF7,SLC25A13,COX10,COX15,SAMHD1,PPIF,NUP214,UCK1,NUP54,PARP1,OGT,ATP6V1B2,AK3,PINK1,NDUFV3,VCP,STAT3,NDUFA6,NUDT16,OPA1
1		1	258	680	18	0.026	0.07	GO:0009199	BP	3	ribonucleoside triphosphate metabolic process	9	NDUFAF7,SLC25A13,COX10,COX15,PPIF,NUP214,UCK1,NUP54,PARP1,OGT,ATP6V1B2,AK3,PINK1,NDUFV3,VCP,STAT3,NDUFA6,OPA1
1		1	260	680	19	0.028	0.073	GO:0009144	BP	3	purine nucleoside triphosphate metabolic process	9	NDUFAF7,SLC25A13,COX10,COX15,SAMHD1,PPIF,NUP214,NUP54,PARP1,OGT,ATP6V1B2,AK3,PINK1,NDUFV3,VCP,STAT3,NDUFA6,NUDT16,OPA1
1		1	253	680	17	0.025	0.067	GO:0009205	BP	3	purine ribonucleoside triphosphate metabolic process	10	NDUFAF7,SLC25A13,COX10,COX15,PPIF,NUP214,NUP54,PARP1,OGT,ATP6V1B2,AK3,PINK1,NDUFV3,VCP,STAT3,NDUFA6,OPA1
1		1	19	680	2	0.003	0.105	GO:0009147	BP	3	pyrimidine nucleoside triphosphate metabolic process	9	UCK1,AK3
1		1	13	680	2	0.003	0.154	GO:0009208	BP	3	pyrimidine ribonucleoside triphosphate metabolic process	10	UCK1,AK3
1		1	16	680	2	0.003	0.125	GO:0009200	BP	3	deoxyribonucleoside triphosphate metabolic process	9	SAMHD1,NUDT16
1		1	9	680	2	0.003	0.222	GO:0009215	BP	3	purine deoxyribonucleoside triphosphate metabolic process	10	SAMHD1,NUDT16
1		1	30	680	3	0.004	0.1	GO:0033865	BP	3	nucleoside bisphosphate metabolic process	8	IMPAD1,PANK2,MCCC2
1		1	30	680	3	0.004	0.1	GO:0033875	BP	3	ribonucleoside bisphosphate metabolic process	9	IMPAD1,PANK2,MCCC2
1		1	30	680	3	0.004	0.1	GO:0034032	BP	3	purine nucleoside bisphosphate metabolic process	9	IMPAD1,PANK2,MCCC2
1		1	16	680	1	0.001	0.062	GO:0034035	BP	3	purine ribonucleoside bisphosphate metabolic process	10	IMPAD1
1		1	113	680	6	0.009	0.053	GO:0009132	BP	3	nucleoside diphosphate metabolic process	8	NUP214,NUP54,OGT,STAT3,ENTPD4,NUDT16
1		1	99	680	6	0.009	0.061	GO:0009185	BP	3	ribonucleoside diphosphate metabolic process	9	NUP214,NUP54,OGT,STAT3,ENTPD4,NUDT16
1		1	97	680	5	0.007	0.052	GO:0009135	BP	3	purine nucleoside diphosphate metabolic process	9	NUP214,NUP54,OGT,STAT3,NUDT16
1		1	97	680	5	0.007	0.052	GO:0009179	BP	3	purine ribonucleoside diphosphate metabolic process	10	NUP214,NUP54,OGT,STAT3,NUDT16
1		1	3	680	1	0.001	0.333	GO:0009138	BP	3	pyrimidine nucleoside diphosphate metabolic process	9	ENTPD4
1		1	1	680	1	0.001	1	GO:0009193	BP	3	pyrimidine ribonucleoside diphosphate metabolic process	10	ENTPD4
1		1	565	680	32	0.047	0.057	GO:0009117	BP	3	nucleotide metabolic process	8	NDUFAF7,SLC25A13,COX10,COX15,ADSS,SAMHD1,IMPAD1,NAMPT,PPIF,OGG1,WNT5A,PANK2,NUP214,UCK1,MCCC2,RFK,NUP54,PARP1,OGT,PRPS1,ATP6V1B2,AK3,PINK1,GART,NDUFV3,FLAD1,VCP,STAT3,NDUFA6,ENTPD4,NUDT16,OPA1
1		1	2	680	2	0.003	1	GO:0072387	BP	3	flavin adenine dinucleotide metabolic process	9	FLAD1,VCP
1		1	1	680	1	0.001	1	GO:0046443	BP	3	FAD metabolic process	10	FLAD1
1		1	138	680	6	0.009	0.043	GO:0019362	BP	3	pyridine nucleotide metabolic process	9	NAMPT,NUP214,NUP54,OGT,VCP,STAT3
1		1	138	680	6	0.009	0.043	GO:0046496	BP	3	nicotinamide nucleotide metabolic process	10	NAMPT,NUP214,NUP54,OGT,VCP,STAT3
1		1	55	680	2	0.003	0.036	GO:0019674	BP	3	NAD metabolic process	11	NAMPT,VCP
1		1	30	680	1	0.001	0.033	GO:0006734	BP	3	NADH metabolic process	12	VCP
1		1	122	680	1	0.001	0.008	GO:0009187	BP	3	cyclic nucleotide metabolic process	9	WNT5A
1		1	33	680	3	0.004	0.091	GO:0009262	BP	3	deoxyribonucleotide metabolic process	9	SAMHD1,OGG1,NUDT16
1		1	29	680	3	0.004	0.103	GO:0009394	BP	3	2'-deoxyribonucleotide metabolic process	10	SAMHD1,OGG1,NUDT16
1		1	96	680	4	0.006	0.042	GO:0046939	BP	3	nucleotide phosphorylation	9	NUP214,NUP54,OGT,STAT3
1		1	91	680	4	0.006	0.044	GO:0006165	BP	3	nucleoside diphosphate phosphorylation	10	NUP214,NUP54,OGT,STAT3
1		1	42	680	5	0.007	0.119	GO:0006220	BP	3	pyrimidine nucleotide metabolic process	9	OGG1,UCK1,PRPS1,AK3,ENTPD4
1		1	18	680	1	0.001	0.056	GO:0009219	BP	3	pyrimidine deoxyribonucleotide metabolic process	10	OGG1
1		1	450	680	28	0.041	0.062	GO:0009259	BP	3	ribonucleotide metabolic process	9	NDUFAF7,SLC25A13,COX10,COX15,ADSS,IMPAD1,PPIF,WNT5A,PANK2,NUP214,UCK1,MCCC2,RFK,NUP54,PARP1,OGT,PRPS1,ATP6V1B2,AK3,PINK1,GART,NDUFV3,VCP,STAT3,NDUFA6,ENTPD4,NUDT16,OPA1
1		1	21	680	3	0.004	0.143	GO:0009218	BP	3	pyrimidine ribonucleotide metabolic process	10	UCK1,AK3,ENTPD4
1		1	1	680	1	0.001	1	GO:0046444	BP	3	FMN metabolic process	10	RFK
1		1	449	680	26	0.038	0.058	GO:0006163	BP	3	purine nucleotide metabolic process	9	NDUFAF7,SLC25A13,COX10,COX15,ADSS,SAMHD1,IMPAD1,PPIF,WNT5A,PANK2,NUP214,MCCC2,NUP54,PARP1,OGT,PRPS1,ATP6V1B2,AK3,PINK1,GART,NDUFV3,VCP,STAT3,NDUFA6,NUDT16,OPA1
1		1	11	680	2	0.003	0.182	GO:0009151	BP	3	purine deoxyribonucleotide metabolic process	10	SAMHD1,NUDT16
1		1	1	680	1	0.001	1	GO:0035862	BP	3	dITP metabolic process	11	NUDT16
1		1	5	680	1	0.001	0.2	GO:0046060	BP	3	dATP metabolic process	11	SAMHD1
1		1	4	680	1	0.001	0.25	GO:0046070	BP	3	dGTP metabolic process	11	SAMHD1
1		1	436	680	25	0.037	0.057	GO:0009150	BP	3	purine ribonucleotide metabolic process	10	NDUFAF7,SLC25A13,COX10,COX15,ADSS,IMPAD1,PPIF,WNT5A,PANK2,NUP214,MCCC2,NUP54,PARP1,OGT,PRPS1,ATP6V1B2,AK3,PINK1,GART,NDUFV3,VCP,STAT3,NDUFA6,NUDT16,OPA1
1		1	2	680	1	0.001	0.5	GO:0046707	BP	3	IDP metabolic process	11	NUDT16
1		1	37	680	1	0.001	0.027	GO:0046068	BP	3	cGMP metabolic process	11	WNT5A
1		1	14	680	3	0.004	0.214	GO:0046033	BP	3	AMP metabolic process	11	ADSS,PRPS1,AK3
1		1	12	680	2	0.003	0.167	GO:0046040	BP	3	IMP metabolic process	11	ADSS,GART
1		1	2	680	1	0.001	0.5	GO:0046041	BP	3	ITP metabolic process	11	AK3
1		1	14	680	2	0.003	0.143	GO:0015936	BP	3	coenzyme A metabolic process	11	PANK2,MCCC2
1		1	228	680	15	0.022	0.066	GO:0046034	BP	3	ATP metabolic process	11	NDUFAF7,SLC25A13,COX10,COX15,PPIF,NUP214,NUP54,PARP1,OGT,ATP6V1B2,PINK1,NDUFV3,VCP,STAT3,NDUFA6
1		1	4	680	1	0.001	0.25	GO:1990966	BP	3	ATP generation from poly-ADP-D-ribose	12	PARP1
1		1	92	680	7	0.01	0.076	GO:0006119	BP	3	oxidative phosphorylation	12	COX10,COX15,PPIF,PINK1,NDUFV3,VCP,NDUFA6
1		1	78	680	5	0.007	0.064	GO:0042773	BP	3	ATP synthesis coupled electron transport	13	COX10,COX15,PINK1,NDUFV3,NDUFA6
1		1	77	680	5	0.007	0.065	GO:0042775	BP	3	mitochondrial ATP synthesis coupled electron transport	14	COX10,COX15,PINK1,NDUFV3,NDUFA6
1		1	15	680	2	0.003	0.133	GO:0006123	BP	3	mitochondrial electron transport, cytochrome c to oxygen	15	COX10,COX15
1		1	45	680	3	0.004	0.067	GO:0006120	BP	3	mitochondrial electron transport, NADH to ubiquinone	15	PINK1,NDUFV3,NDUFA6
1		1	83	680	4	0.006	0.048	GO:0046031	BP	3	ADP metabolic process	11	NUP214,NUP54,OGT,STAT3
1		1	77	680	4	0.006	0.052	GO:0006757	BP	3	ATP generation from ADP	12	NUP214,NUP54,OGT,STAT3
1		1	103	680	8	0.012	0.078	GO:0009116	BP	3	nucleoside metabolic process	7	OARD1,UCK1,PDCL,PRPS1,AK3,ENTPD4,OPA1,APOBEC3C
1		1	84	680	6	0.009	0.071	GO:0009119	BP	3	ribonucleoside metabolic process	8	UCK1,PDCL,AK3,ENTPD4,OPA1,APOBEC3C
1		1	3	680	1	0.001	0.333	GO:0046116	BP	3	queuosine metabolic process	9	PDCL
1		1	37	680	4	0.006	0.108	GO:0006213	BP	3	pyrimidine nucleoside metabolic process	8	UCK1,AK3,ENTPD4,APOBEC3C
1		1	26	680	4	0.006	0.154	GO:0046131	BP	3	pyrimidine ribonucleoside metabolic process	9	UCK1,AK3,ENTPD4,APOBEC3C
1		1	6	680	1	0.001	0.167	GO:0046087	BP	3	cytidine metabolic process	10	APOBEC3C
1		1	1	680	1	0.001	1	GO:0046048	BP	3	UDP metabolic process	10	ENTPD4
1		1	12	680	1	0.001	0.083	GO:0046036	BP	3	CTP metabolic process	10	UCK1
1		1	9	680	1	0.001	0.111	GO:0046049	BP	3	UMP metabolic process	10	UCK1
1		1	8	680	1	0.001	0.125	GO:0046051	BP	3	UTP metabolic process	10	AK3
1		1	66	680	3	0.004	0.045	GO:0042278	BP	3	purine nucleoside metabolic process	8	OARD1,AK3,OPA1
1		1	63	680	2	0.003	0.032	GO:0046128	BP	3	purine ribonucleoside metabolic process	9	AK3,OPA1
1		1	44	680	2	0.003	0.045	GO:1901068	BP	3	guanosine-containing compound metabolic process	10	AK3,OPA1
1		1	26	680	2	0.003	0.077	GO:0046039	BP	3	GTP metabolic process	11	AK3,OPA1
1		1	4227	680	222	0.326	0.053	GO:0090304	BP	3	nucleic acid metabolic process	6	GCFC2,PTBP1,SLC30A9,WWTR1,ZFP64,UBR2,PHF20,KPNA6,BRD9,METTL1,TDP1,DKK3,EIF2AK2,SNRNP40,MED29,NFYC,ATXN3,DDX3Y,SP100,FSTL3,TCF3,MAP3K13,FOSL2,SART3,UBE2A,TULP3,KCNK2,DIS3,WBP11,HUWE1,KHSRP,TASP1,TBX5,DNAJB11,HNRNPH3,CIRBP,NHP2L1,POLDIP3,RPL3,RBFOX2,POLR3H,BRMS1L,SAMHD1,METTL4,RNMT,SMARCA1,POLR2C,ZNF174,MTFMT,NBN,INTS10,AKAP8,HNRNPUL1,NAMPT,TLE4,PPP3CB,RAD51C,COL1A1,PRKAR1A,KLF3,RNF141,MAGOHB,KRR1,…
1		1	247	680	16	0.024	0.065	GO:0090305	BP	3	nucleic acid phosphodiester bond hydrolysis	7	TDP1,DIS3,SAMHD1,RAD1,OGG1,NCBP2,CNOT1,EXOSC2,XPA,PARP1,CNOT8,TSR1,RPSA,CSTF3,EDC3,TSEN15
1		1	846	680	39	0.057	0.046	GO:0006259	BP	3	DNA metabolic process	7	SLC30A9,TDP1,ATXN3,SP100,TCF3,UBE2A,KCNK2,HUWE1,METTL4,SMARCA1,POLR2C,NBN,RAD51C,RAD1,OGG1,UCHL5,RBBP6,C7ORF49,POT1,NDFIP1,RBM17,PDGFRA,ORC3,XPA,MBD1,PARP1,HDAC8,INIP,CHEK1,RBMS1,RCHY1,POLR2H,VCP,GATAD2A,NUDT16,ZNF830,ZSWIM7,ISY1,APOBEC3C
1		1	13	680	1	0.001	0.077	GO:0001325	BP	3	formation of extrachromosomal circular DNA	8	NBN
1		1	209	680	8	0.012	0.038	GO:0006310	BP	3	DNA recombination	8	TCF3,NBN,RAD51C,UCHL5,NDFIP1,PARP1,CHEK1,ZSWIM7
1		1	37	680	1	0.001	0.027	GO:0035825	BP	3	homologous recombination	9	RAD51C
1		1	46	680	3	0.004	0.065	GO:0016444	BP	3	somatic cell DNA recombination	9	TCF3,NBN,NDFIP1
1		1	22	680	1	0.001	0.045	GO:0006312	BP	3	mitotic recombination	9	RAD51C
1		1	25	680	3	0.004	0.12	GO:0022616	BP	3	DNA strand elongation	8	NBN,POT1,PARP1
1		1	24	680	1	0.001	0.042	GO:0006266	BP	3	DNA ligation	8	PARP1
1		1	77	680	6	0.009	0.078	GO:0006304	BP	3	DNA modification	8	METTL4,OGG1,MBD1,PARP1,GATAD2A,APOBEC3C
1		1	46	680	4	0.006	0.087	GO:0006305	BP	3	DNA alkylation	9	METTL4,MBD1,PARP1,GATAD2A
1		1	57	680	5	0.007	0.088	GO:0044728	BP	3	DNA methylation or demethylation	9	METTL4,MBD1,PARP1,GATAD2A,APOBEC3C
1		1	46	680	4	0.006	0.087	GO:0006306	BP	3	DNA methylation	10	METTL4,MBD1,PARP1,GATAD2A
1		1	1	680	1	0.001	1	GO:0032775	BP	3	DNA methylation on adenine	11	METTL4
1		1	20	680	1	0.001	0.05	GO:0035510	BP	3	DNA dealkylation	9	APOBEC3C
1		1	14	680	1	0.001	0.071	GO:0080111	BP	3	DNA demethylation	10	APOBEC3C
1		1	8	680	1	0.001	0.125	GO:0042148	BP	3	strand invasion	8	RAD51C
1		1	26	680	2	0.003	0.077	GO:0000732	BP	3	strand displacement	8	NBN,RAD51C
1		1	16	680	1	0.001	0.062	GO:0032042	BP	3	mitochondrial DNA metabolic process	8	PARP1
1		1	267	680	9	0.013	0.034	GO:0006260	BP	3	DNA replication	8	NBN,RAD1,RBBP6,PDGFRA,ORC3,PARP1,CHEK1,RBMS1,ZNF830
1		1	134	680	4	0.006	0.03	GO:0006261	BP	3	DNA-dependent DNA replication	9	NBN,ORC3,PARP1,ZNF830
1		1	2	680	1	0.001	0.5	GO:0036388	BP	3	pre-replicative complex assembly	10	ORC3
1		1	55	680	2	0.003	0.036	GO:0044786	BP	3	cell cycle DNA replication	10	ORC3,ZNF830
1		1	2	680	1	0.001	0.5	GO:1902299	BP	3	pre-replicative complex assembly involved in cell cycle DNA replication	11	ORC3
1		1	49	680	2	0.003	0.041	GO:0033260	BP	3	nuclear DNA replication	11	ORC3,ZNF830
1		1	2	680	1	0.001	0.5	GO:0006267	BP	3	pre-replicative complex assembly involved in nuclear cell cycle DNA replication	12	ORC3
1		1	28	680	1	0.001	0.036	GO:0045005	BP	3	DNA-dependent DNA replication maintenance of fidelity	10	ZNF830
1		1	18	680	1	0.001	0.056	GO:0006271	BP	3	DNA strand elongation involved in DNA replication	10	PARP1
1		1	8	680	1	0.001	0.125	GO:0000733	BP	3	DNA strand renaturation	8	SMARCA1
1		1	41	680	2	0.003	0.049	GO:0006270	BP	3	DNA replication initiation	8	NBN,ORC3
1		1	3792	680	202	0.297	0.053	GO:0016070	BP	3	RNA metabolic process	7	GCFC2,PTBP1,SLC30A9,WWTR1,ZFP64,UBR2,PHF20,KPNA6,BRD9,METTL1,DKK3,EIF2AK2,SNRNP40,MED29,NFYC,ATXN3,DDX3Y,SP100,FSTL3,TCF3,MAP3K13,FOSL2,SART3,TULP3,DIS3,WBP11,KHSRP,TASP1,TBX5,DNAJB11,HNRNPH3,CIRBP,NHP2L1,POLDIP3,RPL3,RBFOX2,POLR3H,BRMS1L,SAMHD1,RNMT,SMARCA1,POLR2C,ZNF174,MTFMT,INTS10,AKAP8,HNRNPUL1,NAMPT,TLE4,PPP3CB,COL1A1,PRKAR1A,KLF3,RNF141,MAGOHB,KRR1,CHD4,CCNC,PRPF4B,CLK4,OGG1,WNT5A,NCBP2,CO…
1		1	525	680	35	0.051	0.067	GO:0034660	BP	3	ncRNA metabolic process	8	METTL1,DIS3,WBP11,KHSRP,NHP2L1,RPL3,POLR2C,MTFMT,INTS10,KRR1,NCBP2,GTF3C2,PNO1,RPL22,GTF2F1,EXOSC2,UTP3,C2ORF49,RPRD1A,CSNK1D,INTS7,RPL7L1,TYW3,TYW5,POLR2H,SMAD3,TSR1,RPSA,PA2G4,SNAPC5,RPL14,RRP7A,YRDC,NUDT16,TSEN15
1		1	3	680	2	0.003	0.667	GO:0071043	BP	3	CUT metabolic process	9	DIS3,EXOSC2
1		1	176	680	9	0.013	0.051	GO:0006399	BP	3	tRNA metabolic process	9	METTL1,MTFMT,GTF3C2,EXOSC2,C2ORF49,TYW3,TYW5,YRDC,TSEN15
1		1	20	680	1	0.001	0.05	GO:0010586	BP	3	miRNA metabolic process	9	KHSRP
1		1	13	680	2	0.003	0.154	GO:0016074	BP	3	snoRNA metabolic process	9	EXOSC2,NUDT16
1		1	274	680	18	0.026	0.066	GO:0016072	BP	3	rRNA metabolic process	9	DIS3,WBP11,NHP2L1,RPL3,KRR1,GTF3C2,PNO1,RPL22,EXOSC2,UTP3,CSNK1D,RPL7L1,TSR1,RPSA,PA2G4,RPL14,RRP7A,NUDT16
1		1	84	680	9	0.013	0.107	GO:0016073	BP	3	snRNA metabolic process	9	POLR2C,INTS10,NCBP2,GTF2F1,EXOSC2,RPRD1A,INTS7,POLR2H,SNAPC5
1		1	13	680	1	0.001	0.077	GO:0070525	BP	3	tRNA threonylcarbamoyladenosine metabolic process	8	YRDC
1		1	23	680	2	0.003	0.087	GO:0008334	BP	3	histone mRNA metabolic process	9	NCBP2,PAPD4
1		1	41	680	3	0.004	0.073	GO:0043631	BP	3	RNA polyadenylation	8	APP,PAPD4,CSTF3
1		1	43	680	2	0.003	0.047	GO:0010501	BP	3	RNA secondary structure unwinding	8	DDX3Y,DDX3X
1		1	32	680	6	0.009	0.188	GO:0036260	BP	3	RNA capping	9	RNMT,POLR2C,NCBP2,GTF2F1,POLR2H,CMTR2
1		1	32	680	6	0.009	0.188	GO:0009452	BP	3	7-methylguanosine RNA capping	10	RNMT,POLR2C,NCBP2,GTF2F1,POLR2H,CMTR2
1		1	114	680	10	0.015	0.088	GO:0031123	BP	3	RNA 3'-end processing	9	POLDIP3,MAGOHB,NCBP2,EXOSC2,APP,INTS7,CHTOP,SRSF2,RPSA,CSTF3
1		1	18	680	2	0.003	0.111	GO:0000394	BP	3	RNA splicing, via endonucleolytic cleavage and ligation	10	C2ORF49,TSEN15
1		1	374	680	27	0.04	0.072	GO:0034470	BP	3	ncRNA processing	9	METTL1,DIS3,WBP11,NHP2L1,RPL3,MTFMT,INTS10,KRR1,PNO1,RPL22,EXOSC2,UTP3,C2ORF49,CSNK1D,INTS7,RPL7L1,TYW3,TYW5,SMAD3,TSR1,RPSA,PA2G4,RPL14,RRP7A,YRDC,NUDT16,TSEN15
1		1	24	680	3	0.004	0.125	GO:0043628	BP	3	ncRNA 3'-end processing	10	EXOSC2,INTS7,RPSA
1		1	9	680	1	0.001	0.111	GO:0043144	BP	3	snoRNA processing	10	EXOSC2
1		1	8	680	1	0.001	0.125	GO:0031126	BP	3	snoRNA 3'-end processing	11	EXOSC2
1		1	5	680	1	0.001	0.2	GO:0071051	BP	3	polyadenylation-dependent snoRNA 3'-end processing	12	EXOSC2
1		1	23	680	3	0.004	0.13	GO:0016180	BP	3	snRNA processing	10	INTS10,EXOSC2,INTS7
1		1	13	680	2	0.003	0.154	GO:0034472	BP	3	snRNA 3'-end processing	11	EXOSC2,INTS7
1		1	8	680	1	0.001	0.125	GO:0034475	BP	3	U4 snRNA 3'-end processing	12	EXOSC2
1		1	115	680	7	0.01	0.061	GO:0008033	BP	3	tRNA processing	10	METTL1,MTFMT,C2ORF49,TYW3,TYW5,YRDC,TSEN15
1		1	15	680	2	0.003	0.133	GO:0006388	BP	3	tRNA splicing, via endonucleolytic cleavage and ligation	11	C2ORF49,TSEN15
1		1	241	680	17	0.025	0.071	GO:0006364	BP	3	rRNA processing	10	DIS3,WBP11,NHP2L1,RPL3,KRR1,PNO1,RPL22,EXOSC2,UTP3,CSNK1D,RPL7L1,TSR1,RPSA,PA2G4,RPL14,RRP7A,NUDT16
1		1	30	680	2	0.003	0.067	GO:0000460	BP	3	maturation of 5.8S rRNA	11	EXOSC2,RPSA
1		1	19	680	2	0.003	0.105	GO:0000466	BP	3	maturation of 5.8S rRNA from tricistronic rRNA transcript (SSU-rRNA, 5.8S rRNA, LSU-rRNA)	12	EXOSC2,RPSA
1		1	22	680	2	0.003	0.091	GO:0000470	BP	3	maturation of LSU-rRNA	11	NHP2L1,RPL7L1
1		1	8	680	1	0.001	0.125	GO:0000463	BP	3	maturation of LSU-rRNA from tricistronic rRNA transcript (SSU-rRNA, 5.8S rRNA, LSU-rRNA)	12	RPL7L1
1		1	50	680	5	0.007	0.1	GO:0030490	BP	3	maturation of SSU-rRNA	11	NHP2L1,KRR1,UTP3,TSR1,RPSA
1		1	35	680	4	0.006	0.114	GO:0000462	BP	3	maturation of SSU-rRNA from tricistronic rRNA transcript (SSU-rRNA, 5.8S rRNA, LSU-rRNA)	12	KRR1,UTP3,TSR1,RPSA
1		1	11	680	2	0.003	0.182	GO:0031125	BP	3	rRNA 3'-end processing	11	EXOSC2,RPSA
1		1	87	680	7	0.01	0.08	GO:0031124	BP	3	mRNA 3'-end processing	10	POLDIP3,MAGOHB,NCBP2,APP,CHTOP,SRSF2,CSTF3
1		1	39	680	2	0.003	0.051	GO:0006378	BP	3	mRNA polyadenylation	11	APP,CSTF3
1		1	31	680	6	0.009	0.194	GO:0006370	BP	3	7-methylguanosine mRNA capping	10	RNMT,POLR2C,NCBP2,GTF2F1,POLR2H,CMTR2
1		1	5	680	1	0.001	0.2	GO:0000393	BP	3	spliceosomal conformational changes to generate catalytic conformation	11	ISY1
1		1	3	680	1	0.001	0.333	GO:0000350	BP	3	generation of catalytic spliceosome for second transesterification step	12	ISY1
1		1	44	680	5	0.007	0.114	GO:0000380	BP	3	alternative mRNA splicing, via spliceosome	11	PTBP1,RBFOX2,RBM17,SRSF2,RSRC1
1		1	16	680	3	0.004	0.188	GO:0045292	BP	3	mRNA cis splicing, via spliceosome	11	WBP11,NCBP2,PSIP1
1		1	52	680	7	0.01	0.135	GO:0000245	BP	3	spliceosomal complex assembly	11	GCFC2,TXNL4B,PSIP1,ZRSR2,SF3A3,ISY1,C7ORF55-LUC7L2
1		1	25	680	4	0.006	0.16	GO:0006376	BP	3	mRNA splice site selection	12	PSIP1,SF3A3,ISY1,C7ORF55-LUC7L2
1		1	6	680	2	0.003	0.333	GO:0000389	BP	3	mRNA 3'-splice site recognition	13	SF3A3,ISY1
1		1	6	680	1	0.001	0.167	GO:0000395	BP	3	mRNA 5'-splice site recognition	13	PSIP1
1		1	35	680	2	0.003	0.057	GO:0000387	BP	3	spliceosomal snRNP assembly	11	SART3,WDR77
1		1	11	680	1	0.001	0.091	GO:0000244	BP	3	spliceosomal tri-snRNP complex assembly	12	SART3
1		1	115	680	11	0.016	0.096	GO:0090501	BP	3	RNA phosphodiester bond hydrolysis	8	DIS3,SAMHD1,NCBP2,CNOT1,EXOSC2,CNOT8,TSR1,RPSA,CSTF3,EDC3,TSEN15
1		1	56	680	4	0.006	0.071	GO:0090502	BP	3	RNA phosphodiester bond hydrolysis, endonucleolytic	9	TSR1,RPSA,EDC3,TSEN15
1		1	32	680	4	0.006	0.125	GO:0090503	BP	3	RNA phosphodiester bond hydrolysis, exonucleolytic	9	DIS3,CNOT1,EXOSC2,CNOT8
1		1	23	680	2	0.003	0.087	GO:0006379	BP	3	mRNA cleavage	9	NCBP2,CSTF3
1		1	11	680	1	0.001	0.091	GO:0098787	BP	3	mRNA cleavage involved in mRNA processing	10	NCBP2
1		1	8	680	1	0.001	0.125	GO:0098789	BP	3	pre-mRNA cleavage required for polyadenylation	11	NCBP2
1		1	23	680	3	0.004	0.13	GO:0000469	BP	3	cleavage involved in rRNA processing	9	EXOSC2,TSR1,RPSA
1		1	5	680	1	0.001	0.2	GO:0000459	BP	3	exonucleolytic trimming involved in rRNA processing	10	EXOSC2
1		1	5	680	1	0.001	0.2	GO:0000467	BP	3	exonucleolytic trimming to generate mature 3'-end of 5.8S rRNA from tricistronic rRNA transcript (SSU-rRNA, 5.8S rRNA, LSU-rRNA)	11	EXOSC2
1		1	14	680	2	0.003	0.143	GO:0000478	BP	3	endonucleolytic cleavage involved in rRNA processing	10	TSR1,RPSA
1		1	13	680	2	0.003	0.154	GO:0000479	BP	3	endonucleolytic cleavage of tricistronic rRNA transcript (SSU-rRNA, 5.8S rRNA, LSU-rRNA)	11	TSR1,RPSA
1		1	9	680	1	0.001	0.111	GO:0000447	BP	3	endonucleolytic cleavage in ITS1 to separate SSU-rRNA from 5.8S rRNA and LSU-rRNA from tricistronic rRNA transcript (SSU-rRNA, 5.8S rRNA, LSU-rRNA)	12	RPSA
1		1	2	680	1	0.001	0.5	GO:0000461	BP	3	endonucleolytic cleavage to generate mature 3'-end of SSU-rRNA from (SSU-rRNA, 5.8S rRNA, LSU-rRNA)	12	RPSA
1		1	120	680	8	0.012	0.067	GO:0009451	BP	3	RNA modification	8	METTL1,DNAJB11,RNMT,MTFMT,TYW5,CMTR2,YRDC,NUDT16
1		1	8	680	1	0.001	0.125	GO:0016553	BP	3	base conversion or substitution editing	9	NUDT16
1		1	5	680	1	0.001	0.2	GO:0006382	BP	3	adenosine to inosine editing	10	NUDT16
1		1	14	680	2	0.003	0.143	GO:0016556	BP	3	mRNA modification	9	DNAJB11,CMTR2
1		1	57	680	3	0.004	0.053	GO:0001510	BP	3	RNA methylation	9	METTL1,RNMT,CMTR2
1		1	5	680	2	0.003	0.4	GO:0036265	BP	3	RNA (guanine-N7)-methylation	10	METTL1,RNMT
1		1	2	680	1	0.001	0.5	GO:0106005	BP	3	RNA 5'-cap (guanine-N7)-methylation	11	RNMT
1		1	7	680	1	0.001	0.143	GO:0080009	BP	3	mRNA methylation	10	CMTR2
1		1	2	680	1	0.001	0.5	GO:0036451	BP	3	cap mRNA methylation	11	CMTR2
1		1	1	680	1	0.001	1	GO:0097310	BP	3	cap2 mRNA methylation	12	CMTR2
1		1	67	680	4	0.006	0.06	GO:0006400	BP	3	tRNA modification	9	METTL1,MTFMT,TYW5,YRDC
1		1	1	680	1	0.001	1	GO:0019988	BP	3	charged-tRNA amino acid modification	10	MTFMT
1		1	1	680	1	0.001	1	GO:0071951	BP	3	conversion of methionyl-tRNA to N-formyl-methionyl-tRNA	11	MTFMT
1		1	3	680	1	0.001	0.333	GO:0002949	BP	3	tRNA threonylcarbamoyladenosine modification	10	YRDC
1		1	30	680	1	0.001	0.033	GO:0030488	BP	3	tRNA methylation	10	METTL1
1		1	2	680	1	0.001	0.5	GO:0106004	BP	3	tRNA (guanine-N7)-methylation	11	METTL1
1		1	2	680	1	0.001	0.5	GO:0031591	BP	3	wybutosine biosynthetic process	10	TYW5
1		1	9	680	1	0.001	0.111	GO:0006273	BP	3	lagging strand elongation	8	PARP1
1		1	34	680	3	0.004	0.088	GO:0009225	BP	3	nucleotide-sugar metabolic process	6	DPM1,MGAT1,UGGT1
1		1	7	680	1	0.001	0.143	GO:0019673	BP	3	GDP-mannose metabolic process	7	DPM1
1		1	6	680	1	0.001	0.167	GO:0006011	BP	3	UDP-glucose metabolic process	7	UGGT1
1		1	2	680	1	0.001	0.5	GO:0097359	BP	3	UDP-glucosylation	8	UGGT1
1		1	14	680	1	0.001	0.071	GO:0006047	BP	3	UDP-N-acetylglucosamine metabolic process	7	MGAT1
1		1	448	680	27	0.04	0.06	GO:0034655	BP	3	nucleobase-containing compound catabolic process	6	DIS3,KHSRP,CIRBP,RPL3,SAMHD1,MAGOHB,OGG1,NCBP2,RPL22,CNOT1,PSMF1,HNRNPR,NUP214,ZFP36,EXOSC2,MGAT1,LARP1,CNOT8,PAPD4,VCP,RPSA,EDC3,YTHDF3,RPL14,ENTPD4,NUDT16,APOBEC3C
1		1	3	680	1	0.001	0.333	GO:0009227	BP	3	nucleotide-sugar catabolic process	7	MGAT1
1		1	1	680	1	0.001	1	GO:0006049	BP	3	UDP-N-acetylglucosamine catabolic process	8	MGAT1
1		1	23	680	2	0.003	0.087	GO:0009164	BP	3	nucleoside catabolic process	7	ENTPD4,APOBEC3C
1		1	15	680	2	0.003	0.133	GO:0042454	BP	3	ribonucleoside catabolic process	8	ENTPD4,APOBEC3C
1		1	15	680	2	0.003	0.133	GO:0046135	BP	3	pyrimidine nucleoside catabolic process	8	ENTPD4,APOBEC3C
1		1	8	680	2	0.003	0.25	GO:0046133	BP	3	pyrimidine ribonucleoside catabolic process	9	ENTPD4,APOBEC3C
1		1	6	680	1	0.001	0.167	GO:0006216	BP	3	cytidine catabolic process	10	APOBEC3C
1		1	6	680	1	0.001	0.167	GO:0009972	BP	3	cytidine deamination	11	APOBEC3C
1		1	12	680	2	0.003	0.167	GO:0034656	BP	3	nucleobase-containing small molecule catabolic process	7	ENTPD4,NUDT16
1		1	342	680	21	0.031	0.061	GO:0006401	BP	3	RNA catabolic process	7	DIS3,KHSRP,CIRBP,RPL3,MAGOHB,NCBP2,RPL22,CNOT1,PSMF1,HNRNPR,NUP214,ZFP36,EXOSC2,LARP1,CNOT8,PAPD4,RPSA,EDC3,YTHDF3,RPL14,NUDT16
1		1	7	680	1	0.001	0.143	GO:0043633	BP	3	polyadenylation-dependent RNA catabolic process	8	EXOSC2
1		1	22	680	3	0.004	0.136	GO:0034661	BP	3	ncRNA catabolic process	8	DIS3,EXOSC2,NUDT16
1		1	6	680	1	0.001	0.167	GO:0043634	BP	3	polyadenylation-dependent ncRNA catabolic process	9	EXOSC2
1		1	1	680	1	0.001	1	GO:0016077	BP	3	snoRNA catabolic process	9	NUDT16
1		1	6	680	1	0.001	0.167	GO:0016078	BP	3	tRNA catabolic process	9	EXOSC2
1		1	15	680	2	0.003	0.133	GO:0016075	BP	3	rRNA catabolic process	9	DIS3,EXOSC2
1		1	3	680	2	0.003	0.667	GO:0071034	BP	3	CUT catabolic process	9	DIS3,EXOSC2
1		1	14	680	1	0.001	0.071	GO:0071025	BP	3	RNA surveillance	8	EXOSC2
1		1	12	680	1	0.001	0.083	GO:0071027	BP	3	nuclear RNA surveillance	9	EXOSC2
1		1	5	680	1	0.001	0.2	GO:0071029	BP	3	nuclear ncRNA surveillance	10	EXOSC2
1		1	5	680	1	0.001	0.2	GO:0071046	BP	3	nuclear polyadenylation-dependent ncRNA catabolic process	11	EXOSC2
1		1	5	680	1	0.001	0.2	GO:0071035	BP	3	nuclear polyadenylation-dependent rRNA catabolic process	12	EXOSC2
1		1	5	680	1	0.001	0.2	GO:0071038	BP	3	nuclear polyadenylation-dependent tRNA catabolic process	12	EXOSC2
1		1	59	680	5	0.007	0.085	GO:1901292	BP	3	nucleoside phosphate catabolic process	7	SAMHD1,OGG1,VCP,ENTPD4,NUDT16
1		1	55	680	5	0.007	0.091	GO:0009166	BP	3	nucleotide catabolic process	8	SAMHD1,OGG1,VCP,ENTPD4,NUDT16
1		1	13	680	2	0.003	0.154	GO:0006244	BP	3	pyrimidine nucleotide catabolic process	9	OGG1,ENTPD4
1		1	29	680	2	0.003	0.069	GO:0009261	BP	3	ribonucleotide catabolic process	9	ENTPD4,NUDT16
1		1	1	680	1	0.001	1	GO:0009222	BP	3	pyrimidine ribonucleotide catabolic process	10	ENTPD4
1		1	19	680	3	0.004	0.158	GO:0009264	BP	3	deoxyribonucleotide catabolic process	9	SAMHD1,OGG1,NUDT16
1		1	12	680	1	0.001	0.083	GO:0009223	BP	3	pyrimidine deoxyribonucleotide catabolic process	10	OGG1
1		1	38	680	2	0.003	0.053	GO:0006195	BP	3	purine nucleotide catabolic process	9	SAMHD1,NUDT16
1		1	6	680	2	0.003	0.333	GO:0009155	BP	3	purine deoxyribonucleotide catabolic process	10	SAMHD1,NUDT16
1		1	28	680	1	0.001	0.036	GO:0009154	BP	3	purine ribonucleotide catabolic process	10	NUDT16
1		1	1	680	1	0.001	1	GO:0072389	BP	3	flavin adenine dinucleotide catabolic process	9	VCP
1		1	5	680	2	0.003	0.4	GO:0009134	BP	3	nucleoside diphosphate catabolic process	8	ENTPD4,NUDT16
1		1	1	680	1	0.001	1	GO:0009140	BP	3	pyrimidine nucleoside diphosphate catabolic process	9	ENTPD4
1		1	3	680	1	0.001	0.333	GO:0009137	BP	3	purine nucleoside diphosphate catabolic process	9	NUDT16
1		1	5	680	2	0.003	0.4	GO:0009191	BP	3	ribonucleoside diphosphate catabolic process	9	ENTPD4,NUDT16
1		1	1	680	1	0.001	1	GO:0009195	BP	3	pyrimidine ribonucleoside diphosphate catabolic process	10	ENTPD4
1		1	1	680	1	0.001	1	GO:0006256	BP	3	UDP catabolic process	11	ENTPD4
1		1	3	680	1	0.001	0.333	GO:0009181	BP	3	purine ribonucleoside diphosphate catabolic process	10	NUDT16
1		1	1	680	1	0.001	1	GO:1901639	BP	3	XDP catabolic process	11	NUDT16
1		1	2	680	1	0.001	0.5	GO:0046709	BP	3	IDP catabolic process	11	NUDT16
1		1	11	680	2	0.003	0.182	GO:0009143	BP	3	nucleoside triphosphate catabolic process	8	SAMHD1,NUDT16
1		1	6	680	2	0.003	0.333	GO:0009146	BP	3	purine nucleoside triphosphate catabolic process	9	SAMHD1,NUDT16
1		1	7	680	2	0.003	0.286	GO:0009204	BP	3	deoxyribonucleoside triphosphate catabolic process	9	SAMHD1,NUDT16
1		1	5	680	2	0.003	0.4	GO:0009217	BP	3	purine deoxyribonucleoside triphosphate catabolic process	10	SAMHD1,NUDT16
1		1	3	680	1	0.001	0.333	GO:0006203	BP	3	dGTP catabolic process	11	SAMHD1
1		1	3	680	1	0.001	0.333	GO:0046061	BP	3	dATP catabolic process	11	SAMHD1
1		1	1	680	1	0.001	1	GO:0035863	BP	3	dITP catabolic process	11	NUDT16
1		1	3424	680	162	0.238	0.047	GO:0034654	BP	3	nucleobase-containing compound biosynthetic process	6	SLC25A13,GCFC2,SLC30A9,WWTR1,ZFP64,UBR2,PHF20,KPNA6,BRD9,ADSS,DKK3,EIF2AK2,MED29,NFYC,ATXN3,SP100,FSTL3,TCF3,MAP3K13,FOSL2,TULP3,KCNK2,KHSRP,TASP1,TBX5,POLDIP3,RBFOX2,POLR3H,BRMS1L,RNMT,SMARCA1,POLR2C,ZNF174,NBN,INTS10,AKAP8,HNRNPUL1,NAMPT,TLE4,PPP3CB,LHPP,RAD51C,COL1A1,PRKAR1A,KLF3,RNF141,MAGOHB,CHD4,CCNC,OGG1,WNT5A,NCBP2,COMMD2,GTF3C2,ID2,ATF2,WDR77,IVNS1ABP,UCHL5,PHTF1,DR1,STAG1,PHF19,SUPT7L,T…
1		1	246	680	14	0.021	0.057	GO:1901293	BP	3	nucleoside phosphate biosynthetic process	7	SLC25A13,ADSS,NAMPT,LHPP,PANK2,UCK1,RFK,PARP1,PRPS1,PINK1,GART,FLAD1,VCP,STAT3
1		1	15	680	1	0.001	0.067	GO:0033866	BP	3	nucleoside bisphosphate biosynthetic process	8	PANK2
1		1	15	680	1	0.001	0.067	GO:0034030	BP	3	ribonucleoside bisphosphate biosynthetic process	9	PANK2
1		1	15	680	1	0.001	0.067	GO:0034033	BP	3	purine nucleoside bisphosphate biosynthetic process	9	PANK2
1		1	245	680	13	0.019	0.053	GO:0009165	BP	3	nucleotide biosynthetic process	8	SLC25A13,ADSS,NAMPT,PANK2,UCK1,RFK,PARP1,PRPS1,PINK1,GART,FLAD1,VCP,STAT3
1		1	11	680	1	0.001	0.091	GO:0043173	BP	3	nucleotide salvage	9	UCK1
1		1	191	680	11	0.016	0.058	GO:0009260	BP	3	ribonucleotide biosynthetic process	9	SLC25A13,ADSS,PANK2,UCK1,RFK,PARP1,PRPS1,PINK1,GART,VCP,STAT3
1		1	1	680	1	0.001	1	GO:0072388	BP	3	flavin adenine dinucleotide biosynthetic process	9	FLAD1
1		1	1	680	1	0.001	1	GO:0006747	BP	3	FAD biosynthetic process	10	FLAD1
1		1	183	680	9	0.013	0.049	GO:0006164	BP	3	purine nucleotide biosynthetic process	9	SLC25A13,ADSS,PANK2,PARP1,PRPS1,PINK1,GART,VCP,STAT3
1		1	179	680	9	0.013	0.05	GO:0009152	BP	3	purine ribonucleotide biosynthetic process	10	SLC25A13,ADSS,PANK2,PARP1,PRPS1,PINK1,GART,VCP,STAT3
1		1	10	680	1	0.001	0.1	GO:0015937	BP	3	coenzyme A biosynthetic process	11	PANK2
1		1	28	680	2	0.003	0.071	GO:0006221	BP	3	pyrimidine nucleotide biosynthetic process	9	UCK1,PRPS1
1		1	19	680	1	0.001	0.053	GO:0009220	BP	3	pyrimidine ribonucleotide biosynthetic process	10	UCK1
1		1	23	680	1	0.001	0.043	GO:0019363	BP	3	pyridine nucleotide biosynthetic process	9	NAMPT
1		1	23	680	1	0.001	0.043	GO:0019359	BP	3	nicotinamide nucleotide biosynthetic process	10	NAMPT
1		1	19	680	1	0.001	0.053	GO:0009435	BP	3	NAD biosynthetic process	11	NAMPT
1		1	10	680	1	0.001	0.1	GO:0034356	BP	3	NAD biosynthesis via nicotinamide riboside salvage pathway	12	NAMPT
1		1	68	680	6	0.009	0.088	GO:0009142	BP	3	nucleoside triphosphate biosynthetic process	8	SLC25A13,UCK1,PARP1,PINK1,VCP,STAT3
1		1	16	680	1	0.001	0.062	GO:0009148	BP	3	pyrimidine nucleoside triphosphate biosynthetic process	9	UCK1
1		1	53	680	5	0.007	0.094	GO:0009145	BP	3	purine nucleoside triphosphate biosynthetic process	9	SLC25A13,PARP1,PINK1,VCP,STAT3
1		1	57	680	6	0.009	0.105	GO:0009201	BP	3	ribonucleoside triphosphate biosynthetic process	9	SLC25A13,UCK1,PARP1,PINK1,VCP,STAT3
1		1	12	680	1	0.001	0.083	GO:0009209	BP	3	pyrimidine ribonucleoside triphosphate biosynthetic process	10	UCK1
1		1	52	680	5	0.007	0.096	GO:0009206	BP	3	purine ribonucleoside triphosphate biosynthetic process	10	SLC25A13,PARP1,PINK1,VCP,STAT3
1		1	84	680	11	0.016	0.131	GO:0009124	BP	3	nucleoside monophosphate biosynthetic process	8	SLC25A13,ADSS,LHPP,UCK1,RFK,PARP1,PRPS1,PINK1,GART,VCP,STAT3
1		1	66	680	9	0.013	0.136	GO:0009127	BP	3	purine nucleoside monophosphate biosynthetic process	9	SLC25A13,ADSS,LHPP,PARP1,PRPS1,PINK1,GART,VCP,STAT3
1		1	13	680	1	0.001	0.077	GO:0009130	BP	3	pyrimidine nucleoside monophosphate biosynthetic process	9	UCK1
1		1	76	680	11	0.016	0.145	GO:0009156	BP	3	ribonucleoside monophosphate biosynthetic process	9	SLC25A13,ADSS,LHPP,UCK1,RFK,PARP1,PRPS1,PINK1,GART,VCP,STAT3
1		1	9	680	1	0.001	0.111	GO:0009174	BP	3	pyrimidine ribonucleoside monophosphate biosynthetic process	10	UCK1
1		1	66	680	9	0.013	0.136	GO:0009168	BP	3	purine ribonucleoside monophosphate biosynthetic process	10	SLC25A13,ADSS,LHPP,PARP1,PRPS1,PINK1,GART,VCP,STAT3
1		1	9	680	1	0.001	0.111	GO:0006188	BP	3	IMP biosynthetic process	11	GART
1		1	6	680	1	0.001	0.167	GO:0006189	BP	3	'de novo' IMP biosynthetic process	12	GART
1		1	7	680	2	0.003	0.286	GO:0006167	BP	3	AMP biosynthetic process	11	ADSS,PRPS1
1		1	3	680	1	0.001	0.333	GO:0044208	BP	3	'de novo' AMP biosynthetic process	12	ADSS
1		1	43	680	5	0.007	0.116	GO:0006754	BP	3	ATP biosynthetic process	11	SLC25A13,PARP1,PINK1,VCP,STAT3
1		1	1	680	1	0.001	1	GO:0009398	BP	3	FMN biosynthetic process	10	RFK
1		1	39	680	2	0.003	0.051	GO:0009163	BP	3	nucleoside biosynthetic process	7	UCK1,PDCL
1		1	34	680	2	0.003	0.059	GO:0042455	BP	3	ribonucleoside biosynthetic process	8	UCK1,PDCL
1		1	3	680	1	0.001	0.333	GO:0008616	BP	3	queuosine biosynthetic process	9	PDCL
1		1	15	680	1	0.001	0.067	GO:0043174	BP	3	nucleoside salvage	8	UCK1
1		1	23	680	1	0.001	0.043	GO:0046134	BP	3	pyrimidine nucleoside biosynthetic process	8	UCK1
1		1	18	680	1	0.001	0.056	GO:0046132	BP	3	pyrimidine ribonucleoside biosynthetic process	9	UCK1
1		1	9	680	1	0.001	0.111	GO:0006222	BP	3	UMP biosynthetic process	10	UCK1
1		1	12	680	1	0.001	0.083	GO:0006241	BP	3	CTP biosynthetic process	10	UCK1
1		1	3056	680	146	0.215	0.048	GO:0032774	BP	3	RNA biosynthetic process	7	GCFC2,SLC30A9,WWTR1,ZFP64,UBR2,PHF20,KPNA6,BRD9,DKK3,EIF2AK2,MED29,NFYC,ATXN3,SP100,FSTL3,TCF3,MAP3K13,FOSL2,TULP3,KHSRP,TASP1,TBX5,POLDIP3,RBFOX2,POLR3H,BRMS1L,RNMT,SMARCA1,POLR2C,ZNF174,INTS10,AKAP8,HNRNPUL1,NAMPT,TLE4,PPP3CB,COL1A1,PRKAR1A,KLF3,RNF141,MAGOHB,CHD4,CCNC,OGG1,WNT5A,NCBP2,COMMD2,GTF3C2,ID2,ATF2,WDR77,IVNS1ABP,UCHL5,PHTF1,DR1,STAG1,PHF19,SUPT7L,TAF12,KHDRBS1,RAP2C,MXD4,USP22,ZNF576…
1		1	3047	680	146	0.215	0.048	GO:0097659	BP	3	nucleic acid-templated transcription	8	GCFC2,SLC30A9,WWTR1,ZFP64,UBR2,PHF20,KPNA6,BRD9,DKK3,EIF2AK2,MED29,NFYC,ATXN3,SP100,FSTL3,TCF3,MAP3K13,FOSL2,TULP3,KHSRP,TASP1,TBX5,POLDIP3,RBFOX2,POLR3H,BRMS1L,RNMT,SMARCA1,POLR2C,ZNF174,INTS10,AKAP8,HNRNPUL1,NAMPT,TLE4,PPP3CB,COL1A1,PRKAR1A,KLF3,RNF141,MAGOHB,CHD4,CCNC,OGG1,WNT5A,NCBP2,COMMD2,GTF3C2,ID2,ATF2,WDR77,IVNS1ABP,UCHL5,PHTF1,DR1,STAG1,PHF19,SUPT7L,TAF12,KHDRBS1,RAP2C,MXD4,USP22,ZNF576…
1		1	3031	680	145	0.213	0.048	GO:0006351	BP	3	transcription, DNA-templated	9	GCFC2,SLC30A9,WWTR1,ZFP64,UBR2,PHF20,KPNA6,BRD9,DKK3,EIF2AK2,MED29,NFYC,ATXN3,SP100,FSTL3,TCF3,MAP3K13,FOSL2,TULP3,KHSRP,TASP1,TBX5,POLDIP3,RBFOX2,POLR3H,BRMS1L,RNMT,SMARCA1,POLR2C,ZNF174,INTS10,AKAP8,HNRNPUL1,NAMPT,TLE4,PPP3CB,COL1A1,PRKAR1A,KLF3,RNF141,MAGOHB,CHD4,CCNC,OGG1,WNT5A,NCBP2,COMMD2,GTF3C2,ID2,ATF2,WDR77,IVNS1ABP,UCHL5,PHTF1,DR1,STAG1,PHF19,SUPT7L,TAF12,KHDRBS1,MXD4,USP22,ZNF576,SOX4,…
1		1	61	680	1	0.001	0.016	GO:0006360	BP	3	transcription from RNA polymerase I promoter	10	POLR2H
1		1	1721	680	100	0.147	0.058	GO:0006366	BP	3	transcription from RNA polymerase II promoter	10	GCFC2,SLC30A9,WWTR1,PHF20,KPNA6,NFYC,SP100,FSTL3,TCF3,FOSL2,TBX5,POLDIP3,BRMS1L,RNMT,POLR2C,ZNF174,INTS10,NAMPT,TLE4,PPP3CB,PRKAR1A,KLF3,MAGOHB,CHD4,CCNC,WNT5A,NCBP2,ATF2,WDR77,DR1,STAG1,PHF19,TAF12,MXD4,SOX4,LRRFIP1,CNOT1,INSIG2,GTF2F1,PSMF1,ZFP36,TWSG1,SAFB2,RLIM,THAP1,WBP2,GPS2,ZMYM5,MED10,NOTCH2,ELP2,TBX3,USP15,CIR1,BBS7,PPP3CA,RPRD1A,FOXK2,MBD1,BRD4,APP,DCAF6,INTS7,PARP1,HDAC8,OGT,PPRC1,CHEK…
1		1	29	680	2	0.003	0.069	GO:0061614	BP	3	pri-miRNA transcription from RNA polymerase II promoter	11	SMAD3,STAT3
1		1	52	680	5	0.007	0.096	GO:0006383	BP	3	transcription from RNA polymerase III promoter	10	POLR3H,GTF3C2,IVNS1ABP,POLR2H,SNAPC5
1		1	98	680	9	0.013	0.092	GO:0098781	BP	3	ncRNA transcription	10	POLR2C,INTS10,NCBP2,GTF3C2,GTF2F1,RPRD1A,INTS7,POLR2H,SNAPC5
1		1	7	680	1	0.001	0.143	GO:0009304	BP	3	tRNA transcription	11	GTF3C2
1		1	6	680	1	0.001	0.167	GO:0042797	BP	3	tRNA transcription from RNA polymerase III promoter	12	GTF3C2
1		1	31	680	1	0.001	0.032	GO:0009303	BP	3	rRNA transcription	11	GTF3C2
1		1	6	680	1	0.001	0.167	GO:0042791	BP	3	5S class rRNA transcription from RNA polymerase III type 1 promoter	12	GTF3C2
1		1	67	680	8	0.012	0.119	GO:0009301	BP	3	snRNA transcription	11	POLR2C,INTS10,NCBP2,GTF2F1,RPRD1A,INTS7,POLR2H,SNAPC5
1		1	67	680	8	0.012	0.119	GO:0042795	BP	3	snRNA transcription from RNA polymerase II promoter	12	POLR2C,INTS10,NCBP2,GTF2F1,RPRD1A,INTS7,POLR2H,SNAPC5
1		1	18	680	1	0.001	0.056	GO:0009299	BP	3	mRNA transcription	10	STAT3
1		1	13	680	1	0.001	0.077	GO:0042789	BP	3	mRNA transcription from RNA polymerase II promoter	11	STAT3
1		1	198	680	13	0.019	0.066	GO:0006352	BP	3	DNA-templated transcription, initiation	8	WWTR1,TBX5,POLR3H,POLR2C,CCNC,TAF12,GTF2F1,MED10,NOTCH2,SMARCA5,POLR2H,SNAPC5,CTNNBIP1
1		1	150	680	10	0.015	0.067	GO:0006367	BP	3	transcription initiation from RNA polymerase II promoter	9	WWTR1,TBX5,POLR2C,CCNC,TAF12,GTF2F1,MED10,NOTCH2,POLR2H,CTNNBIP1
1		1	8	680	2	0.003	0.25	GO:0006384	BP	3	transcription initiation from RNA polymerase III promoter	9	POLR3H,SNAPC5
1		1	32	680	1	0.001	0.031	GO:0006361	BP	3	transcription initiation from RNA polymerase I promoter	9	POLR2H
1		1	30	680	1	0.001	0.033	GO:0070897	BP	3	DNA-templated transcriptional preinitiation complex assembly	9	TAF12
1		1	24	680	1	0.001	0.042	GO:0051123	BP	3	RNA polymerase II transcriptional preinitiation complex assembly	10	TAF12
1		1	118	680	8	0.012	0.068	GO:0006354	BP	3	DNA-templated transcription, elongation	8	POLR2C,NCBP2,TAF12,GTF2F1,ELP2,BRD4,POLR2H,TCEA2
1		1	30	680	1	0.001	0.033	GO:0006362	BP	3	transcription elongation from RNA polymerase I promoter	9	POLR2H
1		1	93	680	7	0.01	0.075	GO:0006368	BP	3	transcription elongation from RNA polymerase II promoter	9	POLR2C,NCBP2,TAF12,GTF2F1,ELP2,BRD4,POLR2H
1		1	103	680	7	0.01	0.068	GO:0006353	BP	3	DNA-templated transcription, termination	8	POLDIP3,MAGOHB,NCBP2,CHTOP,SRSF2,POLR2H,CSTF3
1		1	68	680	6	0.009	0.088	GO:0006369	BP	3	termination of RNA polymerase II transcription	9	POLDIP3,MAGOHB,NCBP2,CHTOP,SRSF2,CSTF3
1		1	30	680	1	0.001	0.033	GO:0006363	BP	3	termination of RNA polymerase I transcription	9	POLR2H
1		1	10	680	1	0.001	0.1	GO:0008655	BP	3	pyrimidine-containing compound salvage	7	UCK1
1		1	4	680	1	0.001	0.25	GO:0032262	BP	3	pyrimidine nucleotide salvage	8	UCK1
1		1	4	680	1	0.001	0.25	GO:0010138	BP	3	pyrimidine ribonucleotide salvage	9	UCK1
1		1	10	680	1	0.001	0.1	GO:0043097	BP	3	pyrimidine nucleoside salvage	8	UCK1
1		1	3	680	1	0.001	0.333	GO:0044211	BP	3	CTP salvage	9	UCK1
1		1	4	680	1	0.001	0.25	GO:0044206	BP	3	UMP salvage	9	UCK1
1		1	189	680	6	0.009	0.032	GO:0071897	BP	3	DNA biosynthetic process	7	KCNK2,NBN,RAD51C,POT1,RCHY1,VCP
1		1	66	680	1	0.001	0.015	GO:0006278	BP	3	RNA-dependent DNA biosynthetic process	8	POT1
1		1	10	680	1	0.001	0.1	GO:0046950	BP	3	cellular ketone body metabolic process	4	OXCT1
1		1	3	680	1	0.001	0.333	GO:0046952	BP	3	ketone body catabolic process	5	OXCT1
1		1	58	680	3	0.004	0.052	GO:0006081	BP	3	cellular aldehyde metabolic process	4	DKK3,PDXK,ADH5
1		1	3	680	1	0.001	0.333	GO:0046292	BP	3	formaldehyde metabolic process	5	ADH5
1		1	11	680	2	0.003	0.182	GO:0046184	BP	3	aldehyde biosynthetic process	5	DKK3,PDXK
1		1	2	680	1	0.001	0.5	GO:0042822	BP	3	pyridoxal phosphate metabolic process	5	PDXK
1		1	2	680	1	0.001	0.5	GO:0042823	BP	3	pyridoxal phosphate biosynthetic process	6	PDXK
1		1	1	680	1	0.001	1	GO:0009443	BP	3	pyridoxal 5'-phosphate salvage	7	PDXK
1		1	8	680	1	0.001	0.125	GO:0046185	BP	3	aldehyde catabolic process	5	ADH5
1		1	888	680	44	0.065	0.05	GO:0006082	BP	3	organic acid metabolic process	4	ADSS,SLC2A3,SEPHS1,ECHDC1,CRAT,SCD,SLC25A17,LONP2,IMPAD1,LTA4H,PCYOX1,OSBPL9,MTHFD1L,ACAT2,CHPF,MRS2,INSIG2,PANK2,PSMF1,NUP214,MCCC2,HSD17B4,GNS,GLUL,MTHFS,HADHB,ASNSD1,NUP54,PSPH,OGT,PRPS1,AUH,PTS,GART,PEX13,NDST2,SRR,STAT3,BTD,B3GALT6,OAZ2,EXT1,HIBCH,HEXA
1		1	880	680	43	0.063	0.049	GO:0043436	BP	3	oxoacid metabolic process	5	ADSS,SLC2A3,SEPHS1,ECHDC1,CRAT,SCD,SLC25A17,LONP2,IMPAD1,LTA4H,PCYOX1,OSBPL9,MTHFD1L,ACAT2,CHPF,MRS2,INSIG2,PANK2,PSMF1,NUP214,MCCC2,HSD17B4,GNS,GLUL,MTHFS,HADHB,ASNSD1,NUP54,PSPH,OGT,AUH,PTS,GART,PEX13,NDST2,SRR,STAT3,BTD,B3GALT6,OAZ2,EXT1,HIBCH,HEXA
1		1	6	680	1	0.001	0.167	GO:0030202	BP	3	heparin metabolic process	6	NDST2
1		1	6	680	1	0.001	0.167	GO:0030210	BP	3	heparin biosynthetic process	7	NDST2
1		1	34	680	4	0.006	0.118	GO:0050654	BP	3	chondroitin sulfate proteoglycan metabolic process	6	IMPAD1,CHPF,B3GALT6,HEXA
1		1	25	680	2	0.003	0.08	GO:0050650	BP	3	chondroitin sulfate proteoglycan biosynthetic process	7	CHPF,B3GALT6
1		1	801	680	37	0.054	0.046	GO:0019752	BP	3	carboxylic acid metabolic process	6	ADSS,SLC2A3,SEPHS1,ECHDC1,CRAT,SCD,SLC25A17,LONP2,LTA4H,PCYOX1,OSBPL9,MTHFD1L,ACAT2,MRS2,INSIG2,PANK2,PSMF1,NUP214,MCCC2,HSD17B4,GLUL,MTHFS,HADHB,ASNSD1,NUP54,PSPH,OGT,AUH,PTS,GART,PEX13,SRR,STAT3,BTD,OAZ2,HIBCH,HEXA
1		1	85	680	4	0.006	0.047	GO:0043648	BP	3	dicarboxylic acid metabolic process	7	ADSS,MTHFD1L,GLUL,MTHFS
1		1	442	680	24	0.035	0.054	GO:0032787	BP	3	monocarboxylic acid metabolic process	7	ECHDC1,CRAT,SCD,SLC25A17,LONP2,OSBPL9,MTHFD1L,ACAT2,MRS2,INSIG2,PANK2,NUP214,MCCC2,HSD17B4,MTHFS,HADHB,ASNSD1,NUP54,OGT,AUH,PEX13,SRR,STAT3,BTD
1		1	105	680	5	0.007	0.048	GO:0006090	BP	3	pyruvate metabolic process	8	NUP214,NUP54,OGT,SRR,STAT3
1		1	76	680	4	0.006	0.053	GO:0006096	BP	3	glycolytic process	9	NUP214,NUP54,OGT,STAT3
1		1	5	680	2	0.003	0.4	GO:0015942	BP	3	formate metabolic process	8	MTHFD1L,MTHFS
1		1	13	680	1	0.001	0.077	GO:0006089	BP	3	lactate metabolic process	8	MRS2
1		1	35	680	3	0.004	0.086	GO:0008206	BP	3	bile acid metabolic process	8	OSBPL9,PANK2,HSD17B4
1		1	11	680	2	0.003	0.182	GO:0006768	BP	3	biotin metabolic process	8	MCCC2,BTD
1		1	63	680	1	0.001	0.016	GO:0006690	BP	3	icosanoid metabolic process	7	LTA4H
1		1	13	680	1	0.001	0.077	GO:0006691	BP	3	leukotriene metabolic process	8	LTA4H
1		1	306	680	15	0.022	0.049	GO:0006520	BP	3	cellular amino acid metabolic process	7	ADSS,SEPHS1,PCYOX1,PSMF1,MCCC2,GLUL,MTHFS,ASNSD1,PSPH,AUH,PTS,GART,SRR,OAZ2,HIBCH
1		1	174	680	11	0.016	0.063	GO:1901605	BP	3	alpha-amino acid metabolic process	8	ADSS,SEPHS1,MCCC2,GLUL,MTHFS,ASNSD1,PSPH,AUH,GART,SRR,HIBCH
1		1	58	680	3	0.004	0.052	GO:0009064	BP	3	glutamine family amino acid metabolic process	9	GLUL,MTHFS,ASNSD1
1		1	22	680	2	0.003	0.091	GO:0006541	BP	3	glutamine metabolic process	10	GLUL,ASNSD1
1		1	25	680	2	0.003	0.08	GO:0006536	BP	3	glutamate metabolic process	10	GLUL,MTHFS
1		1	50	680	2	0.003	0.04	GO:0009066	BP	3	aspartate family amino acid metabolic process	9	ADSS,ASNSD1
1		1	10	680	1	0.001	0.1	GO:0006531	BP	3	aspartate metabolic process	10	ADSS
1		1	4	680	1	0.001	0.25	GO:0006528	BP	3	asparagine metabolic process	10	ASNSD1
1		1	3	680	1	0.001	0.333	GO:0046416	BP	3	D-amino acid metabolic process	9	SRR
1		1	36	680	4	0.006	0.111	GO:0009069	BP	3	serine family amino acid metabolic process	9	SEPHS1,PSPH,GART,SRR
1		1	9	680	2	0.003	0.222	GO:0006563	BP	3	L-serine metabolic process	10	PSPH,SRR
1		1	12	680	1	0.001	0.083	GO:0006544	BP	3	glycine metabolic process	10	GART
1		1	5	680	1	0.001	0.2	GO:0016259	BP	3	selenocysteine metabolic process	10	SEPHS1
1		1	2	680	1	0.001	0.5	GO:0070178	BP	3	D-serine metabolic process	10	SRR
1		1	22	680	3	0.004	0.136	GO:0009081	BP	3	branched-chain amino acid metabolic process	8	MCCC2,AUH,HIBCH
1		1	7	680	2	0.003	0.286	GO:0006551	BP	3	leucine metabolic process	9	MCCC2,AUH
1		1	9	680	1	0.001	0.111	GO:0006573	BP	3	valine metabolic process	9	HIBCH
1		1	35	680	1	0.001	0.029	GO:0000096	BP	3	sulfur amino acid metabolic process	8	PCYOX1
1		1	10	680	1	0.001	0.1	GO:0019852	BP	3	L-ascorbic acid metabolic process	7	SLC2A3
1		1	29	680	1	0.001	0.034	GO:0030212	BP	3	hyaluronan metabolic process	7	HEXA
1		1	24	680	2	0.003	0.083	GO:0042339	BP	3	keratan sulfate metabolic process	6	GNS,HEXA
1		1	10	680	2	0.003	0.2	GO:0042340	BP	3	keratan sulfate catabolic process	7	GNS,HEXA
1		1	25	680	3	0.004	0.12	GO:0030201	BP	3	heparan sulfate proteoglycan metabolic process	6	NDST2,B3GALT6,EXT1
1		1	19	680	3	0.004	0.158	GO:0015012	BP	3	heparan sulfate proteoglycan biosynthetic process	7	NDST2,B3GALT6,EXT1
1		1	33	680	4	0.006	0.121	GO:0030204	BP	3	chondroitin sulfate metabolic process	6	IMPAD1,CHPF,B3GALT6,HEXA
1		1	10	680	1	0.001	0.1	GO:0030207	BP	3	chondroitin sulfate catabolic process	7	HEXA
1		1	22	680	2	0.003	0.091	GO:0030206	BP	3	chondroitin sulfate biosynthetic process	7	CHPF,B3GALT6
1		1	16	680	1	0.001	0.062	GO:0050427	BP	3	3'-phosphoadenosine 5'-phosphosulfate metabolic process	6	IMPAD1
1		1	203	680	15	0.022	0.074	GO:0016054	BP	3	organic acid catabolic process	5	ECHDC1,CRAT,SLC25A17,LONP2,PCYOX1,ACAT2,MCCC2,HSD17B4,GLUL,MTHFS,HADHB,AUH,PEX13,HIBCH,HEXA
1		1	203	680	15	0.022	0.074	GO:0046395	BP	3	carboxylic acid catabolic process	6	ECHDC1,CRAT,SLC25A17,LONP2,PCYOX1,ACAT2,MCCC2,HSD17B4,GLUL,MTHFS,HADHB,AUH,PEX13,HIBCH,HEXA
1		1	97	680	9	0.013	0.093	GO:0072329	BP	3	monocarboxylic acid catabolic process	7	ECHDC1,CRAT,SLC25A17,LONP2,ACAT2,HSD17B4,HADHB,AUH,PEX13
1		1	14	680	2	0.003	0.143	GO:0043649	BP	3	dicarboxylic acid catabolic process	7	GLUL,MTHFS
1		1	88	680	5	0.007	0.057	GO:0009063	BP	3	cellular amino acid catabolic process	7	PCYOX1,MCCC2,GLUL,AUH,HIBCH
1		1	75	680	4	0.006	0.053	GO:1901606	BP	3	alpha-amino acid catabolic process	8	MCCC2,GLUL,AUH,HIBCH
1		1	20	680	1	0.001	0.05	GO:0009065	BP	3	glutamine family amino acid catabolic process	9	GLUL
1		1	7	680	1	0.001	0.143	GO:0006538	BP	3	glutamate catabolic process	10	GLUL
1		1	19	680	3	0.004	0.158	GO:0009083	BP	3	branched-chain amino acid catabolic process	8	MCCC2,AUH,HIBCH
1		1	5	680	2	0.003	0.4	GO:0006552	BP	3	leucine catabolic process	9	MCCC2,AUH
1		1	4	680	1	0.001	0.25	GO:0006574	BP	3	valine catabolic process	9	HIBCH
1		1	8	680	1	0.001	0.125	GO:0000098	BP	3	sulfur amino acid catabolic process	8	PCYOX1
1		1	13	680	1	0.001	0.077	GO:0030214	BP	3	hyaluronan catabolic process	7	HEXA
1		1	232	680	13	0.019	0.056	GO:0016053	BP	3	organic acid biosynthetic process	5	SEPHS1,SCD,LTA4H,OSBPL9,MTHFD1L,INSIG2,HSD17B4,GLUL,MTHFS,ASNSD1,PSPH,GART,SRR
1		1	232	680	13	0.019	0.056	GO:0046394	BP	3	carboxylic acid biosynthetic process	6	SEPHS1,SCD,LTA4H,OSBPL9,MTHFD1L,INSIG2,HSD17B4,GLUL,MTHFS,ASNSD1,PSPH,GART,SRR
1		1	143	680	6	0.009	0.042	GO:0072330	BP	3	monocarboxylic acid biosynthetic process	7	SCD,OSBPL9,INSIG2,HSD17B4,ASNSD1,SRR
1		1	2	680	1	0.001	0.5	GO:0042866	BP	3	pyruvate biosynthetic process	8	SRR
1		1	26	680	2	0.003	0.077	GO:0006699	BP	3	bile acid biosynthetic process	8	OSBPL9,HSD17B4
1		1	11	680	1	0.001	0.091	GO:0043650	BP	3	dicarboxylic acid biosynthetic process	7	MTHFD1L
1		1	28	680	1	0.001	0.036	GO:0046456	BP	3	icosanoid biosynthetic process	7	LTA4H
1		1	8	680	1	0.001	0.125	GO:0019370	BP	3	leukotriene biosynthetic process	8	LTA4H
1		1	65	680	5	0.007	0.077	GO:0008652	BP	3	cellular amino acid biosynthetic process	7	SEPHS1,GLUL,ASNSD1,PSPH,SRR
1		1	56	680	5	0.007	0.089	GO:1901607	BP	3	alpha-amino acid biosynthetic process	8	SEPHS1,GLUL,ASNSD1,PSPH,SRR
1		1	15	680	1	0.001	0.067	GO:0009084	BP	3	glutamine family amino acid biosynthetic process	9	GLUL
1		1	1	680	1	0.001	1	GO:0006542	BP	3	glutamine biosynthetic process	10	GLUL
1		1	21	680	1	0.001	0.048	GO:0009067	BP	3	aspartate family amino acid biosynthetic process	9	ASNSD1
1		1	2	680	1	0.001	0.5	GO:0006529	BP	3	asparagine biosynthetic process	10	ASNSD1
1		1	1	680	1	0.001	1	GO:0046437	BP	3	D-amino acid biosynthetic process	9	SRR
1		1	15	680	3	0.004	0.2	GO:0009070	BP	3	serine family amino acid biosynthetic process	9	SEPHS1,PSPH,SRR
1		1	6	680	1	0.001	0.167	GO:0006564	BP	3	L-serine biosynthetic process	10	PSPH
1		1	2	680	1	0.001	0.5	GO:0016260	BP	3	selenocysteine biosynthetic process	10	SEPHS1
1		1	1	680	1	0.001	1	GO:0070179	BP	3	D-serine biosynthetic process	10	SRR
1		1	5	680	1	0.001	0.2	GO:0046415	BP	3	urate metabolic process	5	PRPS1
1		1	2	680	1	0.001	0.5	GO:0034418	BP	3	urate biosynthetic process	6	PRPS1
1		1	184	680	10	0.015	0.054	GO:0042180	BP	3	cellular ketone metabolic process	4	DKK3,OXCT1,LONP2,KDSR,INSIG2,PANK2,PSMF1,NMT1,COQ4,OAZ2
1		1	5	680	1	0.001	0.2	GO:0034650	BP	3	cortisol metabolic process	5	DKK3
1		1	32	680	2	0.003	0.062	GO:0042181	BP	3	ketone biosynthetic process	5	DKK3,COQ4
1		1	5	680	1	0.001	0.2	GO:0034651	BP	3	cortisol biosynthetic process	6	DKK3
1		1	25	680	1	0.001	0.04	GO:1901661	BP	3	quinone metabolic process	5	COQ4
1		1	15	680	1	0.001	0.067	GO:1901663	BP	3	quinone biosynthetic process	6	COQ4
1		1	16	680	1	0.001	0.062	GO:0006743	BP	3	ubiquinone metabolic process	6	COQ4
1		1	15	680	1	0.001	0.067	GO:0006744	BP	3	ubiquinone biosynthetic process	7	COQ4
1		1	7	680	1	0.001	0.143	GO:0042182	BP	3	ketone catabolic process	5	OXCT1
1		1	136	680	6	0.009	0.044	GO:0006575	BP	3	cellular modified amino acid metabolic process	4	PCYOX1,MTHFD1L,PANK2,MTHFS,GART,GSTM4
1		1	44	680	1	0.001	0.023	GO:0006749	BP	3	glutathione metabolic process	5	GSTM4
1		1	2	680	1	0.001	0.5	GO:0030329	BP	3	prenylcysteine metabolic process	5	PCYOX1
1		1	2	680	1	0.001	0.5	GO:0030328	BP	3	prenylcysteine catabolic process	6	PCYOX1
1		1	6	680	1	0.001	0.167	GO:0015939	BP	3	pantothenate metabolic process	5	PANK2
1		1	23	680	3	0.004	0.13	GO:0006760	BP	3	folic acid-containing compound metabolic process	5	MTHFD1L,MTHFS,GART
1		1	2	680	1	0.001	0.5	GO:0009397	BP	3	folic acid-containing compound catabolic process	6	MTHFS
1		1	16	680	3	0.004	0.188	GO:0046653	BP	3	tetrahydrofolate metabolic process	6	MTHFD1L,MTHFS,GART
1		1	9	680	2	0.003	0.222	GO:0035999	BP	3	tetrahydrofolate interconversion	7	MTHFD1L,MTHFS
1		1	4	680	1	0.001	0.25	GO:0009256	BP	3	10-formyltetrahydrofolate metabolic process	7	MTHFD1L
1		1	16	680	2	0.003	0.125	GO:0046655	BP	3	folic acid metabolic process	6	MTHFD1L,MTHFS
1		1	1	680	1	0.001	1	GO:0046657	BP	3	folic acid catabolic process	7	MTHFS
1		1	8	680	3	0.004	0.375	GO:0009396	BP	3	folic acid-containing compound biosynthetic process	6	MTHFD1L,MTHFS,GART
1		1	6	680	2	0.003	0.333	GO:0046654	BP	3	tetrahydrofolate biosynthetic process	7	MTHFD1L,GART
1		1	2	680	1	0.001	0.5	GO:0009257	BP	3	10-formyltetrahydrofolate biosynthetic process	8	MTHFD1L
1		1	804	680	41	0.06	0.051	GO:0044255	BP	3	cellular lipid metabolic process	4	DPM1,PI4K2B,CRLS1,ECHDC1,CRAT,SCD,SLC25A17,PIGH,CDS2,LONP2,IMPAD1,PIGL,LTA4H,SDC1,RAB14,KDSR,ACAT2,SDC4,INSIG2,PANK2,SLC44A2,HSD17B4,CEPT1,PDGFRA,TEX2,HADHB,CERS2,ARF1,AUH,TMEM55A,SAMD8,PEX13,POGLUT1,PIGX,B3GALNT1,CTDNEP1,PTPN11,SLC35C1,PSAP,ADH5,HEXA
1		1	81	680	4	0.006	0.049	GO:0006638	BP	3	neutral lipid metabolic process	5	INSIG2,PANK2,CTDNEP1,PTPN11
1		1	28	680	1	0.001	0.036	GO:0046460	BP	3	neutral lipid biosynthetic process	6	CTDNEP1
1		1	209	680	15	0.022	0.072	GO:0030258	BP	3	lipid modification	5	PI4K2B,ECHDC1,CRAT,SLC25A17,LONP2,IMPAD1,ACAT2,HSD17B4,PDGFRA,HADHB,AUH,TMEM55A,PEX13,PTPN11,SLC35C1
1		1	87	680	9	0.013	0.103	GO:0034440	BP	3	lipid oxidation	6	ECHDC1,CRAT,SLC25A17,LONP2,ACAT2,HSD17B4,HADHB,AUH,PEX13
1		1	5	680	1	0.001	0.2	GO:0030259	BP	3	lipid glycosylation	6	SLC35C1
1		1	23	680	1	0.001	0.043	GO:0046839	BP	3	phospholipid dephosphorylation	6	TMEM55A
1		1	83	680	4	0.006	0.048	GO:0046834	BP	3	lipid phosphorylation	6	PI4K2B,IMPAD1,PDGFRA,PTPN11
1		1	344	680	19	0.028	0.055	GO:0046486	BP	3	glycerolipid metabolic process	5	DPM1,PI4K2B,CRLS1,PIGH,CDS2,IMPAD1,PIGL,RAB14,INSIG2,PANK2,SLC44A2,CEPT1,PDGFRA,HADHB,ARF1,TMEM55A,PIGX,CTDNEP1,PTPN11
1		1	220	680	13	0.019	0.059	GO:0045017	BP	3	glycerolipid biosynthetic process	6	DPM1,PI4K2B,CRLS1,PIGH,CDS2,PIGL,RAB14,SLC44A2,CEPT1,ARF1,PIGX,CTDNEP1,PTPN11
1		1	80	680	4	0.006	0.05	GO:0006639	BP	3	acylglycerol metabolic process	6	INSIG2,PANK2,CTDNEP1,PTPN11
1		1	28	680	1	0.001	0.036	GO:0046463	BP	3	acylglycerol biosynthetic process	7	CTDNEP1
1		1	67	680	4	0.006	0.06	GO:0006641	BP	3	triglyceride metabolic process	7	INSIG2,PANK2,CTDNEP1,PTPN11
1		1	26	680	1	0.001	0.038	GO:0019432	BP	3	triglyceride biosynthetic process	8	CTDNEP1
1		1	85	680	4	0.006	0.047	GO:0006720	BP	3	isoprenoid metabolic process	5	DPM1,SDC1,SDC4,ADH5
1		1	66	680	3	0.004	0.045	GO:0006721	BP	3	terpenoid metabolic process	6	SDC1,SDC4,ADH5
1		1	60	680	3	0.004	0.05	GO:0016101	BP	3	diterpenoid metabolic process	7	SDC1,SDC4,ADH5
1		1	53	680	3	0.004	0.057	GO:0001523	BP	3	retinoid metabolic process	8	SDC1,SDC4,ADH5
1		1	8	680	1	0.001	0.125	GO:0016093	BP	3	polyprenol metabolic process	6	DPM1
1		1	5	680	1	0.001	0.2	GO:0019348	BP	3	dolichol metabolic process	7	DPM1
1		1	168	680	12	0.018	0.071	GO:0006643	BP	3	membrane lipid metabolic process	5	DPM1,PIGH,PIGL,KDSR,TEX2,CERS2,SAMD8,POGLUT1,PIGX,B3GALNT1,PSAP,HEXA
1		1	108	680	7	0.01	0.065	GO:0046467	BP	3	membrane lipid biosynthetic process	6	DPM1,PIGH,PIGL,KDSR,CERS2,SAMD8,PIGX
1		1	122	680	7	0.01	0.057	GO:0006665	BP	3	sphingolipid metabolic process	6	KDSR,TEX2,CERS2,SAMD8,B3GALNT1,PSAP,HEXA
1		1	9	680	1	0.001	0.111	GO:0046519	BP	3	sphingoid metabolic process	7	KDSR
1		1	1	680	1	0.001	1	GO:0006666	BP	3	3-keto-sphinganine metabolic process	8	KDSR
1		1	65	680	2	0.003	0.031	GO:0006672	BP	3	ceramide metabolic process	7	CERS2,SAMD8
1		1	71	680	3	0.004	0.042	GO:0030148	BP	3	sphingolipid biosynthetic process	7	KDSR,CERS2,SAMD8
1		1	40	680	2	0.003	0.05	GO:0046513	BP	3	ceramide biosynthetic process	8	CERS2,SAMD8
1		1	101	680	8	0.012	0.079	GO:0006664	BP	3	glycolipid metabolic process	6	DPM1,PIGH,PIGL,POGLUT1,PIGX,B3GALNT1,PSAP,HEXA
1		1	58	680	3	0.004	0.052	GO:0006687	BP	3	glycosphingolipid metabolic process	7	B3GALNT1,PSAP,HEXA
1		1	53	680	4	0.006	0.075	GO:0009247	BP	3	glycolipid biosynthetic process	7	DPM1,PIGH,PIGL,PIGX
1		1	355	680	17	0.025	0.048	GO:0006644	BP	3	phospholipid metabolic process	5	DPM1,PI4K2B,CRLS1,PIGH,CDS2,IMPAD1,PIGL,RAB14,SLC44A2,CEPT1,PDGFRA,HADHB,ARF1,TMEM55A,SAMD8,PIGX,PTPN11
1		1	2	680	1	0.001	0.5	GO:1905371	BP	3	ceramide phosphoethanolamine metabolic process	6	SAMD8
1		1	287	680	16	0.024	0.056	GO:0006650	BP	3	glycerophospholipid metabolic process	6	DPM1,PI4K2B,CRLS1,PIGH,CDS2,IMPAD1,PIGL,RAB14,SLC44A2,CEPT1,PDGFRA,HADHB,ARF1,TMEM55A,PIGX,PTPN11
1		1	22	680	3	0.004	0.136	GO:0046471	BP	3	phosphatidylglycerol metabolic process	7	CRLS1,CDS2,HADHB
1		1	14	680	2	0.003	0.143	GO:0032048	BP	3	cardiolipin metabolic process	8	CRLS1,HADHB
1		1	6	680	1	0.001	0.167	GO:0035965	BP	3	cardiolipin acyl-chain remodeling	9	HADHB
1		1	8	680	1	0.001	0.125	GO:0036148	BP	3	phosphatidylglycerol acyl-chain remodeling	8	CRLS1
1		1	13	680	1	0.001	0.077	GO:0046337	BP	3	phosphatidylethanolamine metabolic process	7	CEPT1
1		1	171	680	11	0.016	0.064	GO:0046488	BP	3	phosphatidylinositol metabolic process	7	DPM1,PI4K2B,PIGH,IMPAD1,PIGL,RAB14,PDGFRA,ARF1,TMEM55A,PIGX,PTPN11
1		1	21	680	1	0.001	0.048	GO:0046856	BP	3	phosphatidylinositol dephosphorylation	8	TMEM55A
1		1	72	680	4	0.006	0.056	GO:0046854	BP	3	phosphatidylinositol phosphorylation	8	PI4K2B,IMPAD1,PDGFRA,PTPN11
1		1	31	680	4	0.006	0.129	GO:0006505	BP	3	GPI anchor metabolic process	8	DPM1,PIGH,PIGL,PIGX
1		1	13	680	1	0.001	0.077	GO:0046341	BP	3	CDP-diacylglycerol metabolic process	7	CDS2
1		1	61	680	2	0.003	0.033	GO:0046470	BP	3	phosphatidylcholine metabolic process	7	SLC44A2,CEPT1
1		1	233	680	13	0.019	0.056	GO:0008654	BP	3	phospholipid biosynthetic process	6	DPM1,PI4K2B,CRLS1,PIGH,CDS2,PIGL,RAB14,SLC44A2,CEPT1,ARF1,SAMD8,PIGX,PTPN11
1		1	199	680	12	0.018	0.06	GO:0046474	BP	3	glycerophospholipid biosynthetic process	7	DPM1,PI4K2B,CRLS1,PIGH,CDS2,PIGL,RAB14,SLC44A2,CEPT1,ARF1,PIGX,PTPN11
1		1	121	680	8	0.012	0.066	GO:0006661	BP	3	phosphatidylinositol biosynthetic process	8	DPM1,PI4K2B,PIGH,PIGL,RAB14,ARF1,PIGX,PTPN11
1		1	38	680	1	0.001	0.026	GO:0036092	BP	3	phosphatidylinositol-3-phosphate biosynthetic process	9	PTPN11
1		1	31	680	4	0.006	0.129	GO:0006506	BP	3	GPI anchor biosynthetic process	9	DPM1,PIGH,PIGL,PIGX
1		1	15	680	3	0.004	0.2	GO:0016254	BP	3	preassembly of GPI anchor in ER membrane	10	PIGH,PIGL,PIGX
1		1	11	680	1	0.001	0.091	GO:0006646	BP	3	phosphatidylethanolamine biosynthetic process	8	CEPT1
1		1	9	680	2	0.003	0.222	GO:0006655	BP	3	phosphatidylglycerol biosynthetic process	8	CRLS1,CDS2
1		1	7	680	1	0.001	0.143	GO:0032049	BP	3	cardiolipin biosynthetic process	9	CRLS1
1		1	12	680	1	0.001	0.083	GO:0016024	BP	3	CDP-diacylglycerol biosynthetic process	8	CDS2
1		1	31	680	2	0.003	0.065	GO:0006656	BP	3	phosphatidylcholine biosynthetic process	8	SLC44A2,CEPT1
1		1	7	680	1	0.001	0.143	GO:0006657	BP	3	CDP-choline pathway	9	CEPT1
1		1	2	680	1	0.001	0.5	GO:1905373	BP	3	ceramide phosphoethanolamine biosynthetic process	7	SAMD8
1		1	11	680	1	0.001	0.091	GO:0006684	BP	3	sphingomyelin metabolic process	6	SAMD8
1		1	5	680	1	0.001	0.2	GO:0006686	BP	3	sphingomyelin biosynthetic process	7	SAMD8
1		1	145	680	9	0.013	0.062	GO:0044242	BP	3	cellular lipid catabolic process	5	ECHDC1,CRAT,SLC25A17,LONP2,ACAT2,HSD17B4,HADHB,AUH,PEX13
1		1	269	680	12	0.018	0.045	GO:0006631	BP	3	fatty acid metabolic process	5	ECHDC1,CRAT,SCD,SLC25A17,LONP2,ACAT2,INSIG2,PANK2,HSD17B4,HADHB,AUH,PEX13
1		1	67	680	2	0.003	0.03	GO:0033559	BP	3	unsaturated fatty acid metabolic process	6	SCD,HSD17B4
1		1	2	680	1	0.001	0.5	GO:1903964	BP	3	monounsaturated fatty acid metabolic process	7	SCD
1		1	19	680	1	0.001	0.053	GO:0000038	BP	3	very long-chain fatty acid metabolic process	6	HSD17B4
1		1	64	680	1	0.001	0.016	GO:0001676	BP	3	long-chain fatty acid metabolic process	6	HSD17B4
1		1	12	680	1	0.001	0.083	GO:0036109	BP	3	alpha-linolenic acid metabolic process	7	HSD17B4
1		1	85	680	9	0.013	0.106	GO:0019395	BP	3	fatty acid oxidation	6	ECHDC1,CRAT,SLC25A17,LONP2,ACAT2,HSD17B4,HADHB,AUH,PEX13
1		1	92	680	2	0.003	0.022	GO:0006633	BP	3	fatty acid biosynthetic process	6	SCD,INSIG2
1		1	28	680	1	0.001	0.036	GO:0006636	BP	3	unsaturated fatty acid biosynthetic process	7	SCD
1		1	2	680	1	0.001	0.5	GO:1903966	BP	3	monounsaturated fatty acid biosynthetic process	8	SCD
1		1	85	680	9	0.013	0.106	GO:0009062	BP	3	fatty acid catabolic process	6	ECHDC1,CRAT,SLC25A17,LONP2,ACAT2,HSD17B4,HADHB,AUH,PEX13
1		1	62	680	8	0.012	0.129	GO:0006635	BP	3	fatty acid beta-oxidation	7	ECHDC1,CRAT,SLC25A17,LONP2,ACAT2,HSD17B4,HADHB,AUH
1		1	15	680	2	0.003	0.133	GO:0033540	BP	3	fatty acid beta-oxidation using acyl-CoA oxidase	8	CRAT,HSD17B4
1		1	7	680	2	0.003	0.286	GO:0001561	BP	3	fatty acid alpha-oxidation	7	SLC25A17,PEX13
1		1	193	680	9	0.013	0.047	GO:0044262	BP	3	cellular carbohydrate metabolic process	4	IMPAD1,GBE1,NLN,OGT,STAT3,EXT1,PPP1R2,PPP1CC,WDR5
1		1	65	680	3	0.004	0.046	GO:0034637	BP	3	cellular carbohydrate biosynthetic process	5	IMPAD1,GBE1,EXT1
1		1	76	680	4	0.006	0.053	GO:0044264	BP	3	cellular polysaccharide metabolic process	5	GBE1,EXT1,PPP1R2,PPP1CC
1		1	65	680	3	0.004	0.046	GO:0006073	BP	3	cellular glucan metabolic process	6	GBE1,PPP1R2,PPP1CC
1		1	65	680	3	0.004	0.046	GO:0005977	BP	3	glycogen metabolic process	7	GBE1,PPP1R2,PPP1CC
1		1	55	680	2	0.003	0.036	GO:0033692	BP	3	cellular polysaccharide biosynthetic process	6	GBE1,EXT1
1		1	45	680	1	0.001	0.022	GO:0009250	BP	3	glucan biosynthetic process	7	GBE1
1		1	45	680	1	0.001	0.022	GO:0005978	BP	3	glycogen biosynthetic process	8	GBE1
1		1	5	680	1	0.001	0.2	GO:0015014	BP	3	heparan sulfate proteoglycan biosynthetic process, polysaccharide chain biosynthetic process	7	EXT1
1		1	10	680	1	0.001	0.1	GO:0006020	BP	3	inositol metabolic process	5	IMPAD1
1		1	4	680	1	0.001	0.25	GO:0006021	BP	3	inositol biosynthetic process	6	IMPAD1
1		1	182	680	20	0.029	0.11	GO:0006413	BP	3	translational initiation	4	EIF2AK2,DDX3Y,RPL3,MTFMT,NCBP2,RPL22,KHDRBS1,EIF2S3,EIF2S1,EIF2B5,IMPACT,LARP1,NCK1,ABCE1,RPSA,EIF1AD,YTHDF3,RPL14,EIF1AY,DDX3X
1		1	25	680	1	0.001	0.04	GO:0002183	BP	3	cytoplasmic translational initiation	5	NCK1
1		1	5	680	1	0.001	0.2	GO:0002190	BP	3	cap-independent translational initiation	6	NCK1
1		1	3	680	1	0.001	0.333	GO:0002191	BP	3	cap-dependent translational initiation	6	NCK1
1		1	4	680	1	0.001	0.25	GO:0019740	BP	3	nitrogen utilization	2	GLUL
1		1	2	680	1	0.001	0.5	GO:0019676	BP	3	ammonia assimilation cycle	3	GLUL
1		1	5943	680	302	0.444	0.051	GO:0050896	BP	3	response to stimulus	2	SLC25A13,RALA,IFRD1,RNF216,PTBP1,MAP4K5,SLC30A9,WWTR1,SERPINB1,UBR2,PHF20,FAS,UBA6,GABARAPL2,ADSS,TBC1D23,TDP1,DKK3,EIF2AK2,SLC2A3,AP3D1,ZC3H15,ATXN3,SP100,MAPK6,GNB5,FSTL3,RNF126,MAP3K13,LMAN1,RAB7A,UBE2A,UBE2K,TULP3,GNB1,MKNK1,STK17B,KCNK2,OXCT1,HUWE1,KHSRP,ANKRD10,CRLS1,BRAP,DNAJB11,PPP2R3C,CIRBP,RPL3,RBFOX2,MYH9,POLR3H,NDRG3,DOK5,DNAJC5,ARFRP1,TM9SF4,SAMHD1,USP14,RNMT,LONP2,POLR2C,NBN,VRK3,AK…
1		1	1137	680	58	0.085	0.051	GO:0009719	BP	3	response to endogenous stimulus	3	PTBP1,UBR2,FAS,DKK3,FSTL3,GNB1,OXCT1,CRLS1,RBFOX2,POLR2C,AKAP8,COL1A1,PRKAR1A,KLF3,EHD1,RAB35,WNT5A,NCBP2,SDC1,TIA1,RAB14,IDE,CNOT1,INSIG2,GTF2F1,ZFP36,TWSG1,SAFB2,PTPRA,PDGFRA,USP15,RDX,ACTR2,IQGAP1,CSNK1D,APP,PARP1,EIF2B5,CCNA2,OGT,ATP6V1B2,IMPACT,LARP1,MMP14,STC1,LEMD2,POLR2H,CITED2,SMAD3,RAB31,STAT3,JUNB,RGMB,AP3S1,PTPN11,PRKAR1B,HDAC2,COL5A2
1		1	980	680	51	0.075	0.052	GO:0071495	BP	3	cellular response to endogenous stimulus	4	PTBP1,UBR2,DKK3,FSTL3,GNB1,RBFOX2,POLR2C,AKAP8,COL1A1,PRKAR1A,KLF3,EHD1,RAB35,WNT5A,NCBP2,TIA1,RAB14,IDE,CNOT1,GTF2F1,ZFP36,TWSG1,SAFB2,PTPRA,PDGFRA,USP15,RDX,ACTR2,IQGAP1,CSNK1D,APP,PARP1,CCNA2,OGT,ATP6V1B2,IMPACT,LARP1,STC1,LEMD2,POLR2H,CITED2,SMAD3,RAB31,STAT3,JUNB,RGMB,AP3S1,PTPN11,PRKAR1B,HDAC2,COL5A2
1		1	2954	680	142	0.209	0.048	GO:0042221	BP	3	response to chemical	3	SLC25A13,RALA,PTBP1,UBR2,FAS,ADSS,DKK3,EIF2AK2,ZC3H15,ATXN3,SP100,MAPK6,FSTL3,RNF126,UBE2K,GNB1,KCNK2,OXCT1,KHSRP,CRLS1,DNAJB11,RPL3,RBFOX2,DOK5,SAMHD1,USP14,RNMT,LONP2,POLR2C,AKAP8,NAMPT,TLE4,PPP3CB,PPIF,COL1A1,PRKAR1A,KLF3,EHD1,RAB35,FAF2,DPYSL3,OGG1,WNT5A,NCBP2,MAPKAPK3,IL1R1,STK25,SDC1,ATF2,TIA1,RAB14,VPS4B,IDE,SOX4,CNOT1,INSIG2,GTF2F1,PSMF1,RBCK1,ZFP36,TWSG1,SAFB2,IL13RA1,WBP2,PTPRA,EIF2S1,P…
1		1	1158	680	55	0.081	0.047	GO:1901700	BP	3	response to oxygen-containing compound	4	UBR2,FAS,GNB1,OXCT1,CRLS1,AKAP8,PPP3CB,PPIF,COL1A1,PRKAR1A,KLF3,OGG1,WNT5A,MAPKAPK3,STK25,SDC1,ATF2,IDE,SOX4,INSIG2,ZFP36,PTPRA,PDGFRA,GLUL,ACTR2,PPP3CA,IQGAP1,MBD1,APP,PARP1,EIF2B5,CCNA2,PSPH,OGT,ATP6V1B2,IMPACT,LARP1,KCNMA1,PINK1,STC1,SRSF2,SRR,RAB31,STAT3,JUNB,ASXL1,AP3S1,PTPN11,COL18A1,PRKAR1B,HDAC2,PSAP,ADH5,OPA1,COL5A2
1		1	803	680	47	0.069	0.059	GO:1901698	BP	3	response to nitrogen compound	4	UBR2,ADSS,ATXN3,GNB1,CRLS1,USP14,COL1A1,PRKAR1A,KLF3,FAF2,OGG1,SDC1,IDE,INSIG2,PTPRA,PDGFRA,UGGT1,RNF121,ACTR2,PPP3CA,IQGAP1,MBD1,APP,PARP1,EIF2B5,CCNA2,OGT,ATP6V1B2,IMPACT,LARP1,STC1,AMFR,PEA15,VCP,SMAD3,UBXN6,SRR,RAB31,STAT3,TMED10,JUNB,AP3S1,PTPN11,PRKAR1B,HDAC2,COL5A2,GET4
1		1	84	680	7	0.01	0.083	GO:0060359	BP	3	response to ammonium ion	5	ADSS,GNB1,MBD1,CCNA2,PEA15,SRR,HDAC2
1		1	260	680	14	0.021	0.054	GO:0001101	BP	3	response to acid chemical	4	UBR2,GNB1,CRLS1,AKAP8,COL1A1,OGG1,WNT5A,ATF2,INSIG2,PDGFRA,ASXL1,COL18A1,HDAC2,COL5A2
1		1	26	680	1	0.001	0.038	GO:0035094	BP	3	response to nicotine	4	HDAC2
1		1	320	680	16	0.024	0.05	GO:0042493	BP	3	response to drug	4	OXCT1,PPP3CB,COL1A1,OGG1,SLC31A1,PPP3CA,MBD1,EIF2B5,GNA12,SRR,SRP68,STAT3,JUNB,TGIF1,COL18A1,HDAC2
1		1	70	680	1	0.001	0.014	GO:0009410	BP	3	response to xenobiotic stimulus	4	GSTM4
1		1	390	680	25	0.037	0.064	GO:0010035	BP	3	response to inorganic substance	4	SLC25A13,FAS,FSTL3,PPIF,COL1A1,OGG1,WNT5A,STK25,SDC1,ATF2,EIF2S1,PPP3CA,IQGAP1,APP,PARP1,EIF2B5,CCNA2,IMPACT,KCNMA1,PINK1,GART,JUNB,COL18A1,HDAC2,PSAP
1		1	246	680	15	0.022	0.061	GO:0010038	BP	3	response to metal ion	5	SLC25A13,FAS,FSTL3,PPIF,OGG1,WNT5A,SDC1,EIF2S1,PPP3CA,IQGAP1,APP,PARP1,EIF2B5,KCNMA1,JUNB
1		1	91	680	8	0.012	0.088	GO:0051592	BP	3	response to calcium ion	6	SLC25A13,PPIF,WNT5A,SDC1,PPP3CA,IQGAP1,KCNMA1,JUNB
1		1	52	680	1	0.001	0.019	GO:0046686	BP	3	response to cadmium ion	6	OGG1
1		1	14	680	1	0.001	0.071	GO:0010042	BP	3	response to manganese ion	6	EIF2S1
1		1	16	680	2	0.003	0.125	GO:0010226	BP	3	response to lithium ion	6	FAS,EIF2B5
1		1	37	680	1	0.001	0.027	GO:0010043	BP	3	response to zinc ion	6	PARP1
1		1	15	680	1	0.001	0.067	GO:0010288	BP	3	response to lead ion	6	APP
1		1	4	680	1	0.001	0.25	GO:1902617	BP	3	response to fluoride	5	COL1A1
1		1	4	680	1	0.001	0.25	GO:1990834	BP	3	response to odorant	4	MMP14
1		1	2317	680	121	0.178	0.052	GO:0010033	BP	3	response to organic substance	4	RALA,PTBP1,UBR2,FAS,ADSS,DKK3,EIF2AK2,ZC3H15,ATXN3,SP100,MAPK6,FSTL3,RNF126,UBE2K,GNB1,OXCT1,KHSRP,CRLS1,DNAJB11,RPL3,RBFOX2,DOK5,SAMHD1,USP14,RNMT,LONP2,POLR2C,AKAP8,NAMPT,TLE4,PPP3CB,COL1A1,PRKAR1A,KLF3,EHD1,RAB35,FAF2,DPYSL3,OGG1,WNT5A,NCBP2,MAPKAPK3,IL1R1,SDC1,TIA1,RAB14,VPS4B,IDE,SOX4,CNOT1,INSIG2,GTF2F1,PSMF1,RBCK1,ZFP36,TWSG1,SAFB2,IL13RA1,PTPRA,EIF2S1,PDGFRA,USP15,GLUL,TANK,UGGT1,RNF121,R…
1		1	146	680	5	0.007	0.034	GO:1901654	BP	3	response to ketone	5	GNB1,AKAP8,PARP1,PSPH,LARP1
1		1	524	680	33	0.049	0.063	GO:0070848	BP	3	response to growth factor	5	PTBP1,DKK3,FSTL3,RBFOX2,DOK5,POLR2C,COL1A1,EHD1,RAB35,WNT5A,NCBP2,TIA1,RAB14,GTF2F1,ZFP36,TWSG1,PDGFRA,USP15,RDX,IQGAP1,CSNK1D,APP,PARP1,CCNA2,LEMD2,POLR2H,CITED2,SMAD3,RGMB,TGIF1,PTPN11,CCBE1,HDAC2
1		1	119	680	6	0.009	0.05	GO:0071772	BP	3	response to BMP	6	FSTL3,WNT5A,TWSG1,USP15,LEMD2,RGMB
1		1	41	680	4	0.006	0.098	GO:1990089	BP	3	response to nerve growth factor	6	EHD1,RAB35,CSNK1D,APP
1		1	36	680	3	0.004	0.083	GO:0070849	BP	3	response to epidermal growth factor	6	COL1A1,IQGAP1,PTPN11
1		1	114	680	13	0.019	0.114	GO:0071774	BP	3	response to fibroblast growth factor	6	PTBP1,RBFOX2,POLR2C,COL1A1,WNT5A,NCBP2,TIA1,RAB14,GTF2F1,ZFP36,IQGAP1,POLR2H,PTPN11
1		1	18	680	3	0.004	0.167	GO:0036119	BP	3	response to platelet-derived growth factor	6	RDX,IQGAP1,CCNA2
1		1	185	680	9	0.013	0.049	GO:0071559	BP	3	response to transforming growth factor beta	6	DKK3,COL1A1,WNT5A,TWSG1,USP15,PARP1,CITED2,SMAD3,HDAC2
1		1	707	680	30	0.044	0.042	GO:0014070	BP	3	response to organic cyclic compound	5	FAS,ADSS,GNB1,CRLS1,RBFOX2,LONP2,NAMPT,COL1A1,OGG1,SDC1,CNOT1,SAFB2,ACTR2,PPP3CA,MBD1,APP,PARP1,CCNA2,PSPH,IMPACT,LARP1,MMP14,STC1,SRSF2,PEA15,SMAD3,SRR,STAT3,JUNB,HDAC2
1		1	67	680	2	0.003	0.03	GO:0043331	BP	3	response to dsRNA	6	PPP3CA,SMAD3
1		1	96	680	6	0.009	0.062	GO:0046683	BP	3	response to organophosphorus	5	CRLS1,COL1A1,SDC1,APP,STC1,JUNB
1		1	779	680	30	0.044	0.039	GO:0034097	BP	3	response to cytokine	5	RALA,FAS,EIF2AK2,ZC3H15,SP100,UBE2K,KHSRP,RPL3,SAMHD1,RNMT,TLE4,PPP3CB,COL1A1,DPYSL3,WNT5A,MAPKAPK3,IL1R1,PSMF1,RBCK1,ZFP36,IL13RA1,PDGFRA,TANK,MCL1,ARF1,ABCE1,STAT3,SOCS6,JUNB,PTPN11
1		1	82	680	2	0.003	0.024	GO:1990823	BP	3	response to leukemia inhibitory factor	6	RNMT,TLE4
1		1	73	680	2	0.003	0.027	GO:0098760	BP	3	response to interleukin-7	6	PDGFRA,PTPN11
1		1	21	680	1	0.001	0.048	GO:0035456	BP	3	response to interferon-beta	6	UBE2K
1		1	45	680	3	0.004	0.067	GO:0070671	BP	3	response to interleukin-12	6	RALA,ARF1,STAT3
1		1	26	680	1	0.001	0.038	GO:0070670	BP	3	response to interleukin-4	6	RPL3
1		1	16	680	1	0.001	0.062	GO:0035455	BP	3	response to interferon-alpha	6	EIF2AK2
1		1	83	680	2	0.003	0.024	GO:0070555	BP	3	response to interleukin-1	6	IL1R1,TANK
1		1	25	680	1	0.001	0.04	GO:0070741	BP	3	response to interleukin-6	6	STAT3
1		1	226	680	6	0.009	0.027	GO:0034612	BP	3	response to tumor necrosis factor	6	FAS,COL1A1,PSMF1,RBCK1,ZFP36,TANK
1		1	682	680	26	0.038	0.038	GO:0033993	BP	3	response to lipid	5	FAS,GNB1,CRLS1,RBFOX2,AKAP8,COL1A1,OGG1,WNT5A,MAPKAPK3,SDC1,VPS4B,CNOT1,INSIG2,ZFP36,SAFB2,MBD1,PARP1,CCNA2,PSPH,STC1,SRR,STAT3,JUNB,ASXL1,HDAC2,ADH5
1		1	81	680	4	0.006	0.049	GO:0032526	BP	3	response to retinoic acid	6	COL1A1,WNT5A,ASXL1,HDAC2
1		1	102	680	5	0.007	0.049	GO:0032355	BP	3	response to estradiol	6	COL1A1,OGG1,MBD1,CCNA2,STAT3
1		1	1	680	1	0.001	1	GO:1905711	BP	3	response to phosphatidylethanolamine	6	CRLS1
1		1	69	680	3	0.004	0.043	GO:0070542	BP	3	response to fatty acid	6	GNB1,AKAP8,INSIG2
1		1	35	680	1	0.001	0.029	GO:0033574	BP	3	response to testosterone	6	PSPH
1		1	672	680	29	0.043	0.043	GO:0009725	BP	3	response to hormone	5	FAS,GNB1,OXCT1,CRLS1,RBFOX2,AKAP8,COL1A1,PRKAR1A,SDC1,IDE,CNOT1,INSIG2,SAFB2,PTPRA,RDX,IQGAP1,PARP1,EIF2B5,CCNA2,OGT,ATP6V1B2,MMP14,STC1,RAB31,STAT3,JUNB,AP3S1,PTPN11,PRKAR1B
1		1	27	680	2	0.003	0.074	GO:0034694	BP	3	response to prostaglandin	6	GNB1,AKAP8
1		1	19	680	2	0.003	0.105	GO:0044321	BP	3	response to leptin	6	CCNA2,STAT3
1		1	21	680	1	0.001	0.048	GO:0034698	BP	3	response to gonadotropin	6	CCNA2
1		1	20	680	2	0.003	0.1	GO:0097066	BP	3	response to thyroid hormone	6	CRLS1,RDX
1		1	304	680	8	0.012	0.026	GO:0048545	BP	3	response to steroid hormone	6	FAS,RBFOX2,COL1A1,SDC1,CNOT1,SAFB2,PARP1,STC1
1		1	113	680	5	0.007	0.044	GO:0031960	BP	3	response to corticosteroid	7	FAS,COL1A1,SDC1,PARP1,STC1
1		1	101	680	3	0.004	0.03	GO:0051384	BP	3	response to glucocorticoid	8	FAS,SDC1,STC1
1		1	21	680	1	0.001	0.048	GO:0051385	BP	3	response to mineralocorticoid	8	PARP1
1		1	4	680	1	0.001	0.25	GO:1904044	BP	3	response to aldosterone	9	PARP1
1		1	725	680	46	0.068	0.063	GO:0010243	BP	3	response to organonitrogen compound	5	UBR2,ADSS,ATXN3,GNB1,CRLS1,USP14,COL1A1,PRKAR1A,KLF3,FAF2,OGG1,SDC1,IDE,INSIG2,PTPRA,PDGFRA,UGGT1,RNF121,ACTR2,PPP3CA,IQGAP1,MBD1,APP,PARP1,EIF2B5,CCNA2,OGT,ATP6V1B2,IMPACT,LARP1,STC1,AMFR,PEA15,VCP,UBXN6,SRR,RAB31,STAT3,TMED10,JUNB,AP3S1,PTPN11,PRKAR1B,HDAC2,COL5A2,GET4
1		1	33	680	3	0.004	0.091	GO:0071867	BP	3	response to monoamine	6	GNB1,APP,HDAC2
1		1	33	680	3	0.004	0.091	GO:0071869	BP	3	response to catecholamine	7	GNB1,APP,HDAC2
1		1	14	680	1	0.001	0.071	GO:1903350	BP	3	response to dopamine	8	HDAC2
1		1	3	680	1	0.001	0.333	GO:0071873	BP	3	response to norepinephrine	8	APP
1		1	1	680	1	0.001	1	GO:1901561	BP	3	response to benomyl	6	IMPACT
1		1	26	680	2	0.003	0.077	GO:0014075	BP	3	response to amine	6	PPP3CA,HDAC2
1		1	17	680	2	0.003	0.118	GO:0001975	BP	3	response to amphetamine	7	PPP3CA,HDAC2
1		1	75	680	6	0.009	0.08	GO:0043279	BP	3	response to alkaloid	6	MBD1,CCNA2,PEA15,SRR,TMED10,HDAC2
1		1	22	680	2	0.003	0.091	GO:0014072	BP	3	response to isoquinoline alkaloid	7	PEA15,SRR
1		1	22	680	2	0.003	0.091	GO:0043278	BP	3	response to morphine	8	PEA15,SRR
1		1	31	680	3	0.004	0.097	GO:0042220	BP	3	response to cocaine	7	MBD1,CCNA2,HDAC2
1		1	6	680	1	0.001	0.167	GO:1904386	BP	3	response to L-phenylalanine derivative	6	CRLS1
1		1	103	680	7	0.01	0.068	GO:0014074	BP	3	response to purine-containing compound	6	ADSS,COL1A1,SDC1,APP,STC1,JUNB,HDAC2
1		1	11	680	1	0.001	0.091	GO:0031000	BP	3	response to caffeine	7	HDAC2
1		1	70	680	5	0.007	0.071	GO:0051591	BP	3	response to cAMP	7	COL1A1,SDC1,APP,STC1,JUNB
1		1	378	680	19	0.028	0.05	GO:1901652	BP	3	response to peptide	6	GNB1,COL1A1,PRKAR1A,KLF3,IDE,INSIG2,PTPRA,IQGAP1,APP,PARP1,EIF2B5,CCNA2,OGT,ATP6V1B2,RAB31,STAT3,AP3S1,PTPN11,PRKAR1B
1		1	15	680	2	0.003	0.133	GO:1904645	BP	3	response to amyloid-beta	7	APP,PARP1
1		1	336	680	17	0.025	0.051	GO:0043434	BP	3	response to peptide hormone	7	GNB1,COL1A1,PRKAR1A,IDE,INSIG2,PTPRA,IQGAP1,PARP1,EIF2B5,CCNA2,OGT,ATP6V1B2,RAB31,STAT3,AP3S1,PTPN11,PRKAR1B
1		1	30	680	1	0.001	0.033	GO:0060416	BP	3	response to growth hormone	8	STAT3
1		1	212	680	9	0.013	0.042	GO:0032868	BP	3	response to insulin	8	IDE,INSIG2,PTPRA,PARP1,OGT,ATP6V1B2,RAB31,AP3S1,PTPN11
1		1	38	680	4	0.006	0.105	GO:0033762	BP	3	response to glucagon	8	GNB1,PRKAR1A,CCNA2,PRKAR1B
1		1	16	680	1	0.001	0.062	GO:1990776	BP	3	response to angiotensin	8	IQGAP1
1		1	3	680	1	0.001	0.333	GO:0034699	BP	3	response to luteinizing hormone	8	CCNA2
1		1	93	680	5	0.007	0.054	GO:0043200	BP	3	response to amino acid	6	UBR2,CRLS1,COL1A1,PDGFRA,COL5A2
1		1	10	680	1	0.001	0.1	GO:0043201	BP	3	response to leucine	7	UBR2
1		1	5	680	1	0.001	0.2	GO:0097068	BP	3	response to thyroxine	7	CRLS1
1		1	166	680	7	0.01	0.042	GO:0009743	BP	3	response to carbohydrate	5	OXCT1,PPP3CB,SOX4,GLUL,PPP3CA,EIF2B5,OPA1
1		1	147	680	7	0.01	0.048	GO:0034284	BP	3	response to monosaccharide	6	OXCT1,PPP3CB,SOX4,GLUL,PPP3CA,EIF2B5,OPA1
1		1	142	680	7	0.01	0.049	GO:0009746	BP	3	response to hexose	7	OXCT1,PPP3CB,SOX4,GLUL,PPP3CA,EIF2B5,OPA1
1		1	139	680	7	0.01	0.05	GO:0009749	BP	3	response to glucose	8	OXCT1,PPP3CB,SOX4,GLUL,PPP3CA,EIF2B5,OPA1
1		1	3	680	1	0.001	0.333	GO:0034465	BP	3	response to carbon monoxide	5	KCNMA1
1		1	11	680	1	0.001	0.091	GO:0045472	BP	3	response to ether	5	LARP1
1		1	137	680	8	0.012	0.058	GO:0097305	BP	3	response to alcohol	5	GNB1,OXCT1,AKAP8,OGG1,ACTR2,LARP1,STAT3,HDAC2
1		1	88	680	5	0.007	0.057	GO:0045471	BP	3	response to ethanol	6	OXCT1,OGG1,ACTR2,STAT3,HDAC2
1		1	2	680	1	0.001	0.5	GO:1901355	BP	3	response to rapamycin	6	LARP1
1		1	20	680	2	0.003	0.1	GO:0034695	BP	3	response to prostaglandin E	6	GNB1,AKAP8
1		1	11	680	1	0.001	0.091	GO:1905144	BP	3	response to acetylcholine	5	GNB1
1		1	166	680	7	0.01	0.042	GO:0009636	BP	3	response to toxic substance	4	FAS,EIF2AK2,SDC1,XPA,AAED1,PINK1,ADH5
1		1	27	680	2	0.003	0.074	GO:0046685	BP	3	response to arsenic-containing substance	4	PPIF,DDX3X
1		1	39	680	2	0.003	0.051	GO:0046677	BP	3	response to antibiotic	4	ACTR2,RSRC1
1		1	3	680	1	0.001	0.333	GO:0035983	BP	3	response to trichostatin A	5	ACTR2
1		1	9	680	1	0.001	0.111	GO:0072718	BP	3	response to cisplatin	4	SLC31A1
1		1	2782	680	148	0.218	0.053	GO:0006950	BP	3	response to stress	3	IFRD1,RNF216,SLC30A9,FAS,UBA6,GABARAPL2,TBC1D23,TDP1,EIF2AK2,ATXN3,SP100,RNF126,MAP3K13,LMAN1,UBE2A,UBE2K,GNB1,KCNK2,OXCT1,HUWE1,DNAJB11,CIRBP,MYH9,POLR3H,TM9SF4,SAMHD1,USP14,POLR2C,NBN,AKAP8,PPIF,RAD51C,COL1A1,DUSP3,PRKAR1A,EHD1,FAF2,RAD1,DPYSL3,OGG1,WNT5A,TUSC2,SNX4,MAPKAPK3,IL1R1,STK25,ID2,SDC1,ATF2,UCHL5,RAB14,RBBP6,C7ORF49,SDC4,SOX4,CNOT1,INSIG2,PSMF1,NUP214,MACF1,ZFP36,NDFIP1,GPS2,EIF2S1,RB…
1		1	177	680	15	0.022	0.085	GO:0035966	BP	3	response to topologically incorrect protein	4	EIF2AK2,ATXN3,RNF126,DNAJB11,FAF2,EIF2S1,UGGT1,RNF121,NCK1,AMFR,LMNA,VCP,HSPA4,CTDSP2,CREB3L2
1		1	159	680	13	0.019	0.082	GO:0006986	BP	3	response to unfolded protein	5	EIF2AK2,DNAJB11,FAF2,EIF2S1,UGGT1,RNF121,NCK1,AMFR,LMNA,VCP,HSPA4,CTDSP2,CREB3L2
1		1	23	680	4	0.006	0.174	GO:0051788	BP	3	response to misfolded protein	5	ATXN3,RNF126,UGGT1,VCP
1		1	347	680	21	0.031	0.061	GO:0006979	BP	3	response to oxidative stress	4	PPIF,COL1A1,OGG1,STK25,SDC1,PDGFRA,XPA,APP,MCL1,PARP1,CCNA2,IMPACT,MMP14,PINK1,PSIP1,SCARA3,MSRB3,NDUFA6,HDAC2,PSAP,ETV5
1		1	178	680	10	0.015	0.056	GO:0000302	BP	3	response to reactive oxygen species	5	PPIF,COL1A1,STK25,SDC1,PDGFRA,CCNA2,IMPACT,PINK1,HDAC2,PSAP
1		1	110	680	8	0.012	0.073	GO:0042542	BP	3	response to hydrogen peroxide	6	PPIF,COL1A1,STK25,SDC1,IMPACT,PINK1,HDAC2,PSAP
1		1	16	680	1	0.001	0.062	GO:0071731	BP	3	response to nitric oxide	6	CCNA2
1		1	34	680	1	0.001	0.029	GO:0034405	BP	3	response to fluid shear stress	4	CITED2
1		1	10	680	1	0.001	0.1	GO:0051409	BP	3	response to nitrosative stress	4	ADH5
1		1	19	680	1	0.001	0.053	GO:0035902	BP	3	response to immobilization stress	4	ACTR2
1		1	30	680	2	0.003	0.067	GO:0002931	BP	3	response to ischemia	4	PPIF,PINK1
1		1	948	680	41	0.06	0.043	GO:0006952	BP	3	defense response	4	RNF216,FAS,TBC1D23,EIF2AK2,SP100,UBE2K,POLR3H,SAMHD1,AKAP8,OGG1,WNT5A,TUSC2,SNX4,MAPKAPK3,IL1R1,SDC1,RAB14,PSMF1,ZFP36,NDFIP1,TANK,BRD4,APP,ABCE1,AP1G1,SMAD3,STAT3,SOCS6,METRNL,CHID1,CTNNBIP1,PTPN11,ELMOD2,C5ORF30,TUBB,CD47,DPP4,TRIM27,NRAS,DDX3X,APOBEC3C
1		1	423	680	18	0.026	0.043	GO:0006954	BP	3	inflammatory response	5	FAS,TBC1D23,OGG1,WNT5A,TUSC2,SNX4,IL1R1,SDC1,ZFP36,NDFIP1,BRD4,SMAD3,STAT3,METRNL,CHID1,CTNNBIP1,C5ORF30,CD47
1		1	89	680	3	0.004	0.034	GO:0002526	BP	3	acute inflammatory response	6	OGG1,STAT3,CTNNBIP1
1		1	21	680	1	0.001	0.048	GO:0006953	BP	3	acute-phase response	7	STAT3
1		1	10	680	2	0.003	0.2	GO:0006991	BP	3	response to sterol depletion	4	INSIG2,LMNA
1		1	487	680	23	0.034	0.047	GO:0009611	BP	3	response to wounding	4	IFRD1,LMAN1,GNB1,KCNK2,MYH9,RAD51C,COL1A1,PRKAR1A,EHD1,DPYSL3,WNT5A,SDC1,SDC4,MACF1,ZFP36,PDGFRA,CERS2,GNA12,AK3,SMAD3,PTPN11,PRKAR1B,HDAC2
1		1	51	680	3	0.004	0.059	GO:0048678	BP	3	response to axon injury	5	KCNK2,DPYSL3,CERS2
1		1	404	680	19	0.028	0.047	GO:0042060	BP	3	wound healing	5	IFRD1,LMAN1,GNB1,MYH9,RAD51C,COL1A1,PRKAR1A,EHD1,WNT5A,SDC1,SDC4,MACF1,PDGFRA,GNA12,AK3,SMAD3,PTPN11,PRKAR1B,HDAC2
1		1	60	680	3	0.004	0.05	GO:0043627	BP	3	response to estrogen	3	WBP2,MMP14,CITED2
1		1	558	680	26	0.038	0.047	GO:0009607	BP	3	response to biotic stimulus	3	RNF216,FAS,EIF2AK2,PPP2R3C,POLR3H,SAMHD1,AKAP8,HNRNPUL1,WNT5A,TUSC2,MAPKAPK3,IVNS1ABP,RAB14,GTF2F1,ZFP36,ARF1,NCK1,SMAD3,SRR,JUNB,ELMOD2,HDAC2,CD47,ADH5,DDX3X,APOBEC3C
1		1	1458	680	71	0.104	0.049	GO:0009605	BP	3	response to external stimulus	3	RALA,RNF216,FAS,GABARAPL2,TBC1D23,EIF2AK2,AP3D1,GNB1,KCNK2,OXCT1,PPP2R3C,POLR3H,DOK5,SAMHD1,USP14,AKAP8,HNRNPUL1,COL1A1,OGG1,WNT5A,TUSC2,SNX4,MAPKAPK3,IL1R1,ID2,IVNS1ABP,RAB14,GTF2F1,ZFP36,NDFIP1,PTPRA,EIF2S1,PDGFRA,GLUL,NMT1,XPA,MBD1,BRD4,APP,CERS2,ARF1,PSPH,OGT,CHEK1,IMPACT,LARP1,MMP14,NCK1,STC1,SRSF2,CITED2,SUN1,AP1G1,SMAD3,FBXO22,SRR,JUNB,RBM4B,METRNL,CHID1,PTPN11,ELMOD2,C5ORF30,EXT1,PPP1CC,H…
1		1	247	680	10	0.015	0.04	GO:0071496	BP	3	cellular response to external stimulus	4	FAS,GABARAPL2,EIF2AK2,COL1A1,EIF2S1,GLUL,CHEK1,IMPACT,FBXO22,PTPN11
1		1	408	680	11	0.016	0.027	GO:0042330	BP	3	taxis	4	RALA,DOK5,USP14,WNT5A,PTPRA,PDGFRA,APP,SMAD3,PTPN11,EXT1,NRAS
1		1	408	680	11	0.016	0.027	GO:0006935	BP	3	chemotaxis	5	RALA,DOK5,USP14,WNT5A,PTPRA,PDGFRA,APP,SMAD3,PTPN11,EXT1,NRAS
1		1	31	680	1	0.001	0.032	GO:0050919	BP	3	negative chemotaxis	6	WNT5A
1		1	38	680	2	0.003	0.053	GO:0050918	BP	3	positive chemotaxis	6	WNT5A,SMAD3
1		1	368	680	16	0.024	0.043	GO:0009991	BP	3	response to extracellular stimulus	4	FAS,GABARAPL2,EIF2AK2,OXCT1,COL1A1,OGG1,EIF2S1,GLUL,MBD1,PSPH,OGT,IMPACT,LARP1,STC1,SRSF2,FBXO22
1		1	344	680	16	0.024	0.047	GO:0031667	BP	3	response to nutrient levels	5	FAS,GABARAPL2,EIF2AK2,OXCT1,COL1A1,OGG1,EIF2S1,GLUL,MBD1,PSPH,OGT,IMPACT,LARP1,STC1,SRSF2,FBXO22
1		1	146	680	9	0.013	0.062	GO:0042594	BP	3	response to starvation	6	FAS,GABARAPL2,EIF2AK2,OXCT1,EIF2S1,GLUL,IMPACT,LARP1,FBXO22
1		1	3	680	1	0.001	0.333	GO:1990928	BP	3	response to amino acid starvation	7	LARP1
1		1	147	680	6	0.009	0.041	GO:0007584	BP	3	response to nutrient	6	OXCT1,COL1A1,OGG1,OGT,STC1,SRSF2
1		1	80	680	4	0.006	0.05	GO:0033273	BP	3	response to vitamin	7	COL1A1,OGG1,STC1,SRSF2
1		1	11	680	2	0.003	0.182	GO:0033197	BP	3	response to vitamin E	8	COL1A1,SRSF2
1		1	31	680	1	0.001	0.032	GO:0033280	BP	3	response to vitamin D	8	STC1
1		1	9	680	1	0.001	0.111	GO:0051593	BP	3	response to folic acid	8	OGG1
1		1	528	680	26	0.038	0.049	GO:0043207	BP	3	response to external biotic stimulus	4	RNF216,FAS,EIF2AK2,PPP2R3C,POLR3H,SAMHD1,AKAP8,HNRNPUL1,WNT5A,TUSC2,MAPKAPK3,IVNS1ABP,RAB14,GTF2F1,ZFP36,ARF1,NCK1,SMAD3,SRR,JUNB,ELMOD2,HDAC2,CD47,ADH5,DDX3X,APOBEC3C
1		1	526	680	26	0.038	0.049	GO:0051707	BP	3	response to other organism	5	RNF216,FAS,EIF2AK2,PPP2R3C,POLR3H,SAMHD1,AKAP8,HNRNPUL1,WNT5A,TUSC2,MAPKAPK3,IVNS1ABP,RAB14,GTF2F1,ZFP36,ARF1,NCK1,SMAD3,SRR,JUNB,ELMOD2,HDAC2,CD47,ADH5,DDX3X,APOBEC3C
1		1	6	680	3	0.004	0.5	GO:0052173	BP	3	response to defenses of other organism involved in symbiotic interaction	6	EIF2AK2,TUSC2,SMAD3
1		1	5	680	2	0.003	0.4	GO:0052564	BP	3	response to immune response of other organism involved in symbiotic interaction	7	EIF2AK2,TUSC2
1		1	1	680	1	0.001	1	GO:0052550	BP	3	response to defense-related reactive oxygen species production by other organism involved in symbiotic interaction	8	TUSC2
1		1	3	680	2	0.003	0.667	GO:0051832	BP	3	avoidance of defenses of other organism involved in symbiotic interaction	7	EIF2AK2,SMAD3
1		1	3	680	2	0.003	0.667	GO:0051834	BP	3	evasion or tolerance of defenses of other organism involved in symbiotic interaction	8	EIF2AK2,SMAD3
1		1	1	680	1	0.001	1	GO:0051807	BP	3	evasion or tolerance of defense response of other organism involved in symbiotic interaction	9	EIF2AK2
1		1	1	680	1	0.001	1	GO:0051805	BP	3	evasion or tolerance of immune response of other organism involved in symbiotic interaction	10	EIF2AK2
1		1	6	680	3	0.004	0.5	GO:0075136	BP	3	response to host	6	EIF2AK2,TUSC2,SMAD3
1		1	6	680	3	0.004	0.5	GO:0052200	BP	3	response to host defenses	7	EIF2AK2,TUSC2,SMAD3
1		1	3	680	2	0.003	0.667	GO:0044413	BP	3	avoidance of host defenses	8	EIF2AK2,SMAD3
1		1	3	680	2	0.003	0.667	GO:0044415	BP	3	evasion or tolerance of host defenses	9	EIF2AK2,SMAD3
1		1	1	680	1	0.001	1	GO:0030682	BP	3	evasion or tolerance of host defense response	10	EIF2AK2
1		1	3	680	2	0.003	0.667	GO:0019049	BP	3	evasion or tolerance of host defenses by virus	10	EIF2AK2,SMAD3
1		1	5	680	2	0.003	0.4	GO:0052572	BP	3	response to host immune response	8	EIF2AK2,TUSC2
1		1	1	680	1	0.001	1	GO:0020012	BP	3	evasion or tolerance of host immune response	9	EIF2AK2
1		1	1	680	1	0.001	1	GO:0030683	BP	3	evasion or tolerance by virus of host immune response	10	EIF2AK2
1		1	1	680	1	0.001	1	GO:0052567	BP	3	response to defense-related host reactive oxygen species production	9	TUSC2
1		1	312	680	12	0.018	0.038	GO:0009617	BP	3	response to bacterium	6	FAS,AKAP8,WNT5A,TUSC2,MAPKAPK3,RAB14,ZFP36,SRR,JUNB,HDAC2,CD47,ADH5
1		1	222	680	11	0.016	0.05	GO:0009615	BP	3	response to virus	6	RNF216,EIF2AK2,POLR3H,SAMHD1,HNRNPUL1,IVNS1ABP,GTF2F1,ARF1,ELMOD2,DDX3X,APOBEC3C
1		1	37	680	1	0.001	0.027	GO:0098586	BP	3	cellular response to virus	7	ARF1
1		1	253	680	8	0.012	0.032	GO:0098542	BP	3	defense response to other organism	6	RNF216,EIF2AK2,POLR3H,SAMHD1,TUSC2,RAB14,ELMOD2,APOBEC3C
1		1	94	680	2	0.003	0.021	GO:0042742	BP	3	defense response to bacterium	7	TUSC2,RAB14
1		1	28	680	1	0.001	0.036	GO:0050829	BP	3	defense response to Gram-negative bacterium	8	TUSC2
1		1	5	680	1	0.001	0.2	GO:0051852	BP	3	disruption by host of symbiont cells	7	TUSC2
1		1	236	680	9	0.013	0.038	GO:0002237	BP	3	response to molecule of bacterial origin	5	FAS,AKAP8,WNT5A,MAPKAPK3,ZFP36,SRR,JUNB,HDAC2,ADH5
1		1	224	680	9	0.013	0.04	GO:0032496	BP	3	response to lipopolysaccharide	6	FAS,AKAP8,WNT5A,MAPKAPK3,ZFP36,SRR,JUNB,HDAC2,ADH5
1		1	952	680	54	0.079	0.057	GO:0009628	BP	3	response to abiotic stimulus	3	FAS,ADSS,ATXN3,UBE2A,GNB1,KCNK2,CIRBP,TM9SF4,RAD51C,COL1A1,RAD1,OGG1,ID2,ATF2,PSMF1,NUP214,EIF2S1,NMT1,TANK,CCDC115,XPA,NUP54,APP,INTS7,PARP1,EIF2B5,CCNA2,PSPH,INIP,CHEK1,IMPACT,KCNMA1,MMP14,PINK1,STC1,LMNA,LZIC,PAPD4,CITED2,SUN1,PSIP1,HIF1AN,SMAD3,SCARA3,JUNB,RBM4B,METRNL,PTPN11,COL18A1,PPP1CC,HDAC2,DPP4,OPA1,DDX3X
1		1	324	680	19	0.028	0.059	GO:0070482	BP	3	response to oxygen levels	4	FAS,GNB1,KCNK2,TM9SF4,COL1A1,PSMF1,CCDC115,CCNA2,KCNMA1,MMP14,PINK1,STC1,LMNA,CITED2,HIF1AN,SMAD3,HDAC2,DPP4,OPA1
1		1	303	680	15	0.022	0.05	GO:0036293	BP	3	response to decreased oxygen levels	5	GNB1,KCNK2,TM9SF4,PSMF1,CCNA2,KCNMA1,MMP14,PINK1,STC1,LMNA,CITED2,HIF1AN,SMAD3,DPP4,OPA1
1		1	295	680	15	0.022	0.051	GO:0001666	BP	3	response to hypoxia	6	GNB1,KCNK2,TM9SF4,PSMF1,CCNA2,KCNMA1,MMP14,PINK1,STC1,LMNA,CITED2,HIF1AN,SMAD3,DPP4,OPA1
1		1	24	680	4	0.006	0.167	GO:0036296	BP	3	response to increased oxygen levels	5	FAS,COL1A1,CCDC115,HDAC2
1		1	17	680	3	0.004	0.176	GO:0055093	BP	3	response to hyperoxia	6	FAS,COL1A1,HDAC2
1		1	27	680	1	0.001	0.037	GO:0009268	BP	3	response to pH	4	IMPACT
1		1	16	680	1	0.001	0.062	GO:0010447	BP	3	response to acidic pH	5	IMPACT
1		1	32	680	2	0.003	0.062	GO:0051602	BP	3	response to electrical stimulus	4	ADSS,OPA1
1		1	359	680	23	0.034	0.064	GO:0009314	BP	3	response to radiation	4	UBE2A,GNB1,CIRBP,RAD51C,RAD1,OGG1,ID2,EIF2S1,NMT1,TANK,XPA,APP,INTS7,PARP1,INIP,CHEK1,IMPACT,LZIC,PAPD4,SCARA3,JUNB,RBM4B,PPP1CC
1		1	232	680	15	0.022	0.065	GO:0009416	BP	3	response to light stimulus	5	UBE2A,GNB1,CIRBP,OGG1,ID2,EIF2S1,NMT1,XPA,APP,CHEK1,IMPACT,PAPD4,SCARA3,RBM4B,PPP1CC
1		1	21	680	3	0.004	0.143	GO:0009648	BP	3	photoperiodism	6	ID2,RBM4B,PPP1CC
1		1	6	680	1	0.001	0.167	GO:0009642	BP	3	response to light intensity	6	PAPD4
1		1	1	680	1	0.001	1	GO:0009646	BP	3	response to absence of light	7	PAPD4
1		1	121	680	7	0.01	0.058	GO:0009411	BP	3	response to UV	6	UBE2A,CIRBP,EIF2S1,XPA,CHEK1,IMPACT,SCARA3
1		1	13	680	1	0.001	0.077	GO:0010225	BP	3	response to UV-C	7	IMPACT
1		1	13	680	2	0.003	0.154	GO:0009650	BP	3	UV protection	7	XPA,SCARA3
1		1	142	680	7	0.01	0.049	GO:0010212	BP	3	response to ionizing radiation	5	RAD51C,RAD1,TANK,INTS7,PARP1,INIP,LZIC
1		1	52	680	1	0.001	0.019	GO:0010332	BP	3	response to gamma radiation	6	PARP1
1		1	184	680	9	0.013	0.049	GO:0009266	BP	3	response to temperature stimulus	4	ATXN3,CIRBP,NUP214,EIF2S1,NUP54,EIF2B5,PSIP1,METRNL,HDAC2
1		1	138	680	7	0.01	0.051	GO:0009408	BP	3	response to heat	5	ATXN3,NUP214,EIF2S1,NUP54,EIF2B5,PSIP1,HDAC2
1		1	40	680	2	0.003	0.05	GO:0009409	BP	3	response to cold	5	CIRBP,METRNL
1		1	54	680	3	0.004	0.056	GO:0006970	BP	3	response to osmotic stress	4	ATF2,KCNMA1,DDX3X
1		1	159	680	11	0.016	0.069	GO:0009612	BP	3	response to mechanical stimulus	4	FAS,KCNK2,COL1A1,XPA,PSPH,CHEK1,MMP14,CITED2,SUN1,JUNB,PTPN11
1		1	16	680	1	0.001	0.062	GO:0010996	BP	3	response to auditory stimulus	5	XPA
1		1	11	680	2	0.003	0.182	GO:0009415	BP	3	response to water	4	ATF2,COL18A1
1		1	7	680	1	0.001	0.143	GO:0009414	BP	3	response to water deprivation	5	ATF2
1		1	4	680	1	0.001	0.25	GO:0051599	BP	3	response to hydrostatic pressure	5	COL18A1
1		1	46	680	3	0.004	0.065	GO:0014823	BP	3	response to activity	3	OXCT1,METRNL,OPA1
1		1	17	680	2	0.003	0.118	GO:0014850	BP	3	response to muscle activity	4	METRNL,OPA1
1		1	138	680	4	0.006	0.029	GO:0051606	BP	3	detection of stimulus	3	GNB1,SOX4,NMT1,PARP1
1		1	68	680	2	0.003	0.029	GO:0009581	BP	3	detection of external stimulus	4	GNB1,NMT1
1		1	70	680	2	0.003	0.029	GO:0009582	BP	3	detection of abiotic stimulus	4	GNB1,NMT1
1		1	34	680	2	0.003	0.059	GO:0009583	BP	3	detection of light stimulus	5	GNB1,NMT1
1		1	26	680	2	0.003	0.077	GO:0009584	BP	3	detection of visible light	6	GNB1,NMT1
1		1	11	680	1	0.001	0.091	GO:0051775	BP	3	response to redox state	3	ADH5
1		1	4964	680	244	0.359	0.049	GO:0051716	BP	3	cellular response to stimulus	3	RALA,PTBP1,MAP4K5,SLC30A9,WWTR1,UBR2,PHF20,FAS,UBA6,GABARAPL2,ADSS,TDP1,DKK3,EIF2AK2,AP3D1,ZC3H15,ATXN3,SP100,MAPK6,GNB5,FSTL3,RNF126,MAP3K13,RAB7A,UBE2A,UBE2K,TULP3,GNB1,MKNK1,STK17B,KCNK2,OXCT1,HUWE1,KHSRP,ANKRD10,BRAP,DNAJB11,RPL3,RBFOX2,MYH9,NDRG3,DOK5,ARFRP1,SAMHD1,USP14,RNMT,POLR2C,NBN,VRK3,AKAP8,NAMPT,TLE4,PPP3CB,PPIF,RAD51C,DRG2,COL1A1,DUSP3,PRKAR1A,KLF3,EHD1,CHD4,RAB35,PAK1IP1,FAF2,RAD1,…
1		1	244	680	15	0.022	0.061	GO:0104004	BP	3	cellular response to environmental stimulus	4	FAS,ADSS,GNB1,COL1A1,RAD1,EIF2S1,NMT1,TANK,XPA,INTS7,CHEK1,IMPACT,PAPD4,PTPN11,DDX3X
1		1	244	680	15	0.022	0.061	GO:0071214	BP	3	cellular response to abiotic stimulus	5	FAS,ADSS,GNB1,COL1A1,RAD1,EIF2S1,NMT1,TANK,XPA,INTS7,CHEK1,IMPACT,PAPD4,PTPN11,DDX3X
1		1	142	680	10	0.015	0.07	GO:0071478	BP	3	cellular response to radiation	6	GNB1,RAD1,EIF2S1,NMT1,TANK,XPA,INTS7,CHEK1,IMPACT,PAPD4
1		1	63	680	3	0.004	0.048	GO:0071479	BP	3	cellular response to ionizing radiation	7	RAD1,TANK,INTS7
1		1	87	680	7	0.01	0.08	GO:0071482	BP	3	cellular response to light stimulus	7	GNB1,EIF2S1,NMT1,XPA,CHEK1,IMPACT,PAPD4
1		1	2	680	1	0.001	0.5	GO:0071484	BP	3	cellular response to light intensity	8	PAPD4
1		1	1	680	1	0.001	1	GO:0071485	BP	3	cellular response to absence of light	9	PAPD4
1		1	1	680	1	0.001	1	GO:1990603	BP	3	dark adaptation	10	PAPD4
1		1	68	680	4	0.006	0.059	GO:0034644	BP	3	cellular response to UV	8	EIF2S1,XPA,CHEK1,IMPACT
1		1	4	680	1	0.001	0.25	GO:0071494	BP	3	cellular response to UV-C	9	IMPACT
1		1	9	680	1	0.001	0.111	GO:0071257	BP	3	cellular response to electrical stimulus	6	ADSS
1		1	12	680	1	0.001	0.083	GO:0071467	BP	3	cellular response to pH	6	IMPACT
1		1	7	680	1	0.001	0.143	GO:0071468	BP	3	cellular response to acidic pH	7	IMPACT
1		1	66	680	4	0.006	0.061	GO:0071260	BP	3	cellular response to mechanical stimulus	6	FAS,COL1A1,CHEK1,PTPN11
1		1	138	680	3	0.004	0.022	GO:0071216	BP	3	cellular response to biotic stimulus	4	AKAP8,WNT5A,ZFP36
1		1	120	680	3	0.004	0.025	GO:0071219	BP	3	cellular response to molecule of bacterial origin	5	AKAP8,WNT5A,ZFP36
1		1	2214	680	107	0.157	0.048	GO:0070887	BP	3	cellular response to chemical stimulus	4	RALA,PTBP1,UBR2,FAS,DKK3,EIF2AK2,ZC3H15,ATXN3,SP100,MAPK6,FSTL3,RNF126,UBE2K,GNB1,KCNK2,OXCT1,KHSRP,DNAJB11,RPL3,RBFOX2,DOK5,SAMHD1,RNMT,POLR2C,AKAP8,TLE4,PPP3CB,PPIF,COL1A1,PRKAR1A,KLF3,EHD1,RAB35,DPYSL3,OGG1,WNT5A,NCBP2,IL1R1,STK25,TIA1,RAB14,IDE,SOX4,CNOT1,GTF2F1,PSMF1,RBCK1,ZFP36,TWSG1,SAFB2,IL13RA1,WBP2,PTPRA,EIF2S1,PDGFRA,USP15,TANK,CCDC115,UGGT1,SLC31A1,RNF121,RDX,ACTR2,PPP3CA,IQGAP1,CSNK1…
1		1	155	680	8	0.012	0.052	GO:0071229	BP	3	cellular response to acid chemical	5	UBR2,GNB1,AKAP8,COL1A1,WNT5A,PDGFRA,HDAC2,COL5A2
1		1	1	680	1	0.001	1	GO:1902618	BP	3	cellular response to fluoride	6	COL1A1
1		1	784	680	36	0.053	0.046	GO:1901701	BP	3	cellular response to oxygen-containing compound	5	UBR2,GNB1,OXCT1,AKAP8,PPP3CB,PPIF,COL1A1,PRKAR1A,KLF3,WNT5A,STK25,IDE,SOX4,ZFP36,PTPRA,PDGFRA,ACTR2,PPP3CA,APP,PARP1,CCNA2,OGT,ATP6V1B2,IMPACT,LARP1,PINK1,STC1,RAB31,STAT3,AP3S1,PTPN11,PRKAR1B,HDAC2,PSAP,OPA1,COL5A2
1		1	76	680	3	0.004	0.039	GO:1901655	BP	3	cellular response to ketone	6	GNB1,AKAP8,LARP1
1		1	6	680	1	0.001	0.167	GO:0071362	BP	3	cellular response to ether	6	LARP1
1		1	481	680	26	0.038	0.054	GO:1901699	BP	3	cellular response to nitrogen compound	5	UBR2,GNB1,COL1A1,PRKAR1A,KLF3,IDE,PTPRA,PDGFRA,ACTR2,PPP3CA,APP,PARP1,CCNA2,OGT,ATP6V1B2,IMPACT,LARP1,STC1,SMAD3,RAB31,STAT3,AP3S1,PTPN11,PRKAR1B,HDAC2,COL5A2
1		1	18	680	1	0.001	0.056	GO:1902170	BP	3	cellular response to reactive nitrogen species	6	CCNA2
1		1	40	680	3	0.004	0.075	GO:0071242	BP	3	cellular response to ammonium ion	6	GNB1,CCNA2,HDAC2
1		1	11	680	1	0.001	0.091	GO:1905145	BP	3	cellular response to acetylcholine	7	GNB1
1		1	6	680	1	0.001	0.167	GO:0072719	BP	3	cellular response to cisplatin	5	SLC31A1
1		1	57	680	3	0.004	0.053	GO:0035690	BP	3	cellular response to drug	5	PPP3CB,PPP3CA,EIF2B5
1		1	65	680	1	0.001	0.015	GO:0071466	BP	3	cellular response to xenobiotic stimulus	5	GSTM4
1		1	62	680	1	0.001	0.016	GO:0006805	BP	3	xenobiotic metabolic process	6	GSTM4
1		1	5	680	1	0.001	0.2	GO:0042178	BP	3	xenobiotic catabolic process	7	GSTM4
1		1	7	680	1	0.001	0.143	GO:0097237	BP	3	cellular response to toxic substance	5	PINK1
1		1	14	680	1	0.001	0.071	GO:0071236	BP	3	cellular response to antibiotic	5	ACTR2
1		1	10	680	1	0.001	0.1	GO:0071391	BP	3	cellular response to estrogen stimulus	5	WBP2
1		1	15	680	2	0.003	0.133	GO:0071243	BP	3	cellular response to arsenic-containing substance	5	PPIF,DDX3X
1		1	140	680	10	0.015	0.071	GO:0071241	BP	3	cellular response to inorganic substance	5	FAS,FSTL3,PPIF,OGG1,WNT5A,EIF2S1,IQGAP1,PARP1,CCNA2,JUNB
1		1	117	680	9	0.013	0.077	GO:0071248	BP	3	cellular response to metal ion	6	FAS,FSTL3,PPIF,OGG1,WNT5A,EIF2S1,IQGAP1,PARP1,JUNB
1		1	8	680	1	0.001	0.125	GO:0071287	BP	3	cellular response to manganese ion	7	EIF2S1
1		1	14	680	1	0.001	0.071	GO:0071294	BP	3	cellular response to zinc ion	7	PARP1
1		1	44	680	4	0.006	0.091	GO:0071277	BP	3	cellular response to calcium ion	7	PPIF,WNT5A,IQGAP1,JUNB
1		1	28	680	1	0.001	0.036	GO:0071276	BP	3	cellular response to cadmium ion	7	OGG1
1		1	10	680	1	0.001	0.1	GO:0071285	BP	3	cellular response to lithium ion	7	FAS
1		1	1863	680	93	0.137	0.05	GO:0071310	BP	3	cellular response to organic substance	5	RALA,PTBP1,UBR2,FAS,DKK3,EIF2AK2,ZC3H15,ATXN3,SP100,MAPK6,FSTL3,RNF126,UBE2K,GNB1,OXCT1,KHSRP,DNAJB11,RPL3,RBFOX2,DOK5,SAMHD1,RNMT,POLR2C,AKAP8,TLE4,PPP3CB,COL1A1,PRKAR1A,KLF3,EHD1,RAB35,DPYSL3,WNT5A,NCBP2,IL1R1,TIA1,RAB14,IDE,SOX4,CNOT1,GTF2F1,PSMF1,RBCK1,ZFP36,TWSG1,SAFB2,IL13RA1,PTPRA,EIF2S1,PDGFRA,USP15,TANK,UGGT1,RNF121,RDX,ACTR2,PPP3CA,IQGAP1,CSNK1D,APP,ARF1,PARP1,CCNA2,OGT,ATP6V1B2,IMPACT,…
1		1	47	680	3	0.004	0.064	GO:0097306	BP	3	cellular response to alcohol	6	GNB1,AKAP8,LARP1
1		1	507	680	33	0.049	0.065	GO:0071363	BP	3	cellular response to growth factor stimulus	6	PTBP1,DKK3,FSTL3,RBFOX2,DOK5,POLR2C,COL1A1,EHD1,RAB35,WNT5A,NCBP2,TIA1,RAB14,GTF2F1,ZFP36,TWSG1,PDGFRA,USP15,RDX,IQGAP1,CSNK1D,APP,PARP1,CCNA2,LEMD2,POLR2H,CITED2,SMAD3,RGMB,TGIF1,PTPN11,CCBE1,HDAC2
1		1	36	680	2	0.003	0.056	GO:0035924	BP	3	cellular response to vascular endothelial growth factor stimulus	7	PDGFRA,CCBE1
1		1	40	680	4	0.006	0.1	GO:1990090	BP	3	cellular response to nerve growth factor stimulus	7	EHD1,RAB35,CSNK1D,APP
1		1	119	680	6	0.009	0.05	GO:0071773	BP	3	cellular response to BMP stimulus	7	FSTL3,WNT5A,TWSG1,USP15,LEMD2,RGMB
1		1	17	680	3	0.004	0.176	GO:0036120	BP	3	cellular response to platelet-derived growth factor stimulus	7	RDX,IQGAP1,CCNA2
1		1	182	680	9	0.013	0.049	GO:0071560	BP	3	cellular response to transforming growth factor beta stimulus	7	DKK3,COL1A1,WNT5A,TWSG1,USP15,PARP1,CITED2,SMAD3,HDAC2
1		1	33	680	3	0.004	0.091	GO:0071364	BP	3	cellular response to epidermal growth factor stimulus	7	COL1A1,IQGAP1,PTPN11
1		1	111	680	13	0.019	0.117	GO:0044344	BP	3	cellular response to fibroblast growth factor stimulus	7	PTBP1,RBFOX2,POLR2C,COL1A1,WNT5A,NCBP2,TIA1,RAB14,GTF2F1,ZFP36,IQGAP1,POLR2H,PTPN11
1		1	697	680	25	0.037	0.036	GO:0071345	BP	3	cellular response to cytokine stimulus	6	RALA,FAS,ZC3H15,SP100,UBE2K,KHSRP,RPL3,SAMHD1,RNMT,TLE4,COL1A1,DPYSL3,WNT5A,IL1R1,PSMF1,RBCK1,ZFP36,IL13RA1,PDGFRA,TANK,ARF1,ABCE1,STAT3,SOCS6,PTPN11
1		1	44	680	3	0.004	0.068	GO:0071349	BP	3	cellular response to interleukin-12	7	RALA,ARF1,STAT3
1		1	73	680	2	0.003	0.027	GO:0098761	BP	3	cellular response to interleukin-7	7	PDGFRA,PTPN11
1		1	82	680	2	0.003	0.024	GO:1990830	BP	3	cellular response to leukemia inhibitory factor	7	RNMT,TLE4
1		1	211	680	6	0.009	0.028	GO:0071356	BP	3	cellular response to tumor necrosis factor	7	FAS,COL1A1,PSMF1,RBCK1,ZFP36,TANK
1		1	23	680	1	0.001	0.043	GO:0071353	BP	3	cellular response to interleukin-4	7	RPL3
1		1	13	680	1	0.001	0.077	GO:0035458	BP	3	cellular response to interferon-beta	7	UBE2K
1		1	22	680	1	0.001	0.045	GO:0071354	BP	3	cellular response to interleukin-6	7	STAT3
1		1	62	680	2	0.003	0.032	GO:0071347	BP	3	cellular response to interleukin-1	7	IL1R1,TANK
1		1	433	680	12	0.018	0.028	GO:0071396	BP	3	cellular response to lipid	6	GNB1,RBFOX2,AKAP8,COL1A1,WNT5A,CNOT1,ZFP36,SAFB2,PARP1,CCNA2,STC1,HDAC2
1		1	46	680	2	0.003	0.043	GO:0071398	BP	3	cellular response to fatty acid	7	GNB1,AKAP8
1		1	51	680	3	0.004	0.059	GO:0071300	BP	3	cellular response to retinoic acid	7	COL1A1,WNT5A,HDAC2
1		1	114	680	3	0.004	0.026	GO:0071222	BP	3	cellular response to lipopolysaccharide	7	AKAP8,WNT5A,ZFP36
1		1	450	680	16	0.024	0.036	GO:0071407	BP	3	cellular response to organic cyclic compound	6	GNB1,RBFOX2,COL1A1,CNOT1,SAFB2,ACTR2,PPP3CA,APP,PARP1,CCNA2,IMPACT,LARP1,STC1,SMAD3,STAT3,HDAC2
1		1	50	680	2	0.003	0.04	GO:0071359	BP	3	cellular response to dsRNA	7	PPP3CA,SMAD3
1		1	32	680	2	0.003	0.062	GO:0031050	BP	3	dsRNA fragmentation	8	PPP3CA,SMAD3
1		1	27	680	1	0.001	0.037	GO:0071392	BP	3	cellular response to estradiol stimulus	7	CCNA2
1		1	505	680	20	0.029	0.04	GO:0032870	BP	3	cellular response to hormone stimulus	6	GNB1,RBFOX2,AKAP8,PRKAR1A,IDE,CNOT1,SAFB2,PTPRA,RDX,PARP1,CCNA2,OGT,ATP6V1B2,STC1,RAB31,STAT3,JUNB,AP3S1,PTPN11,PRKAR1B
1		1	15	680	2	0.003	0.133	GO:0044320	BP	3	cellular response to leptin stimulus	7	CCNA2,STAT3
1		1	13	680	1	0.001	0.077	GO:0071371	BP	3	cellular response to gonadotropin stimulus	7	CCNA2
1		1	14	680	1	0.001	0.071	GO:0097067	BP	3	cellular response to thyroid hormone stimulus	7	RDX
1		1	212	680	5	0.007	0.024	GO:0071383	BP	3	cellular response to steroid hormone stimulus	7	RBFOX2,CNOT1,SAFB2,PARP1,STC1
1		1	50	680	1	0.001	0.02	GO:0071384	BP	3	cellular response to corticosteroid stimulus	8	STC1
1		1	47	680	1	0.001	0.021	GO:0071385	BP	3	cellular response to glucocorticoid stimulus	9	STC1
1		1	21	680	2	0.003	0.095	GO:0071379	BP	3	cellular response to prostaglandin stimulus	7	GNB1,AKAP8
1		1	16	680	2	0.003	0.125	GO:0071380	BP	3	cellular response to prostaglandin E stimulus	8	GNB1,AKAP8
1		1	102	680	5	0.007	0.049	GO:0071322	BP	3	cellular response to carbohydrate stimulus	6	OXCT1,PPP3CB,SOX4,PPP3CA,OPA1
1		1	95	680	5	0.007	0.053	GO:0071326	BP	3	cellular response to monosaccharide stimulus	7	OXCT1,PPP3CB,SOX4,PPP3CA,OPA1
1		1	95	680	5	0.007	0.053	GO:0071331	BP	3	cellular response to hexose stimulus	8	OXCT1,PPP3CB,SOX4,PPP3CA,OPA1
1		1	411	680	24	0.035	0.058	GO:0071417	BP	3	cellular response to organonitrogen compound	6	UBR2,GNB1,COL1A1,PRKAR1A,KLF3,IDE,PTPRA,PDGFRA,ACTR2,APP,PARP1,CCNA2,OGT,ATP6V1B2,IMPACT,LARP1,STC1,RAB31,STAT3,AP3S1,PTPN11,PRKAR1B,HDAC2,COL5A2
1		1	30	680	3	0.004	0.1	GO:0071868	BP	3	cellular response to monoamine stimulus	7	GNB1,APP,HDAC2
1		1	30	680	3	0.004	0.1	GO:0071870	BP	3	cellular response to catecholamine stimulus	8	GNB1,APP,HDAC2
1		1	2	680	1	0.001	0.5	GO:0071874	BP	3	cellular response to norepinephrine stimulus	9	APP
1		1	14	680	1	0.001	0.071	GO:1903351	BP	3	cellular response to dopamine	9	HDAC2
1		1	21	680	1	0.001	0.048	GO:0071312	BP	3	cellular response to alkaloid	7	CCNA2
1		1	3	680	1	0.001	0.333	GO:0071314	BP	3	cellular response to cocaine	8	CCNA2
1		1	276	680	15	0.022	0.054	GO:1901653	BP	3	cellular response to peptide	7	GNB1,PRKAR1A,KLF3,IDE,PTPRA,APP,PARP1,CCNA2,OGT,ATP6V1B2,RAB31,STAT3,AP3S1,PTPN11,PRKAR1B
1		1	13	680	2	0.003	0.154	GO:1904646	BP	3	cellular response to amyloid-beta	8	APP,PARP1
1		1	246	680	13	0.019	0.053	GO:0071375	BP	3	cellular response to peptide hormone stimulus	8	GNB1,PRKAR1A,IDE,PTPRA,PARP1,CCNA2,OGT,ATP6V1B2,RAB31,STAT3,AP3S1,PTPN11,PRKAR1B
1		1	7	680	1	0.001	0.143	GO:1990314	BP	3	cellular response to insulin-like growth factor stimulus	9	CCNA2
1		1	19	680	1	0.001	0.053	GO:0071378	BP	3	cellular response to growth hormone stimulus	9	STAT3
1		1	30	680	3	0.004	0.1	GO:0071377	BP	3	cellular response to glucagon stimulus	9	GNB1,PRKAR1A,PRKAR1B
1		1	165	680	8	0.012	0.048	GO:0032869	BP	3	cellular response to insulin stimulus	9	IDE,PTPRA,PARP1,OGT,ATP6V1B2,RAB31,AP3S1,PTPN11
1		1	2	680	1	0.001	0.5	GO:0071373	BP	3	cellular response to luteinizing hormone stimulus	9	CCNA2
1		1	1	680	1	0.001	1	GO:0072755	BP	3	cellular response to benomyl	7	IMPACT
1		1	54	680	4	0.006	0.074	GO:0071230	BP	3	cellular response to amino acid stimulus	7	UBR2,COL1A1,PDGFRA,COL5A2
1		1	7	680	1	0.001	0.143	GO:0071233	BP	3	cellular response to leucine	8	UBR2
1		1	35	680	2	0.003	0.057	GO:0071320	BP	3	cellular response to cAMP	7	APP,STC1
1		1	3	680	1	0.001	0.333	GO:0035984	BP	3	cellular response to trichostatin A	7	ACTR2
1		1	1	680	1	0.001	1	GO:0072752	BP	3	cellular response to rapamycin	7	LARP1
1		1	195	680	12	0.018	0.062	GO:0071453	BP	3	cellular response to oxygen levels	5	FAS,GNB1,KCNK2,PSMF1,CCDC115,CCNA2,PINK1,STC1,LMNA,CITED2,HIF1AN,OPA1
1		1	14	680	2	0.003	0.143	GO:0036295	BP	3	cellular response to increased oxygen levels	6	FAS,CCDC115
1		1	180	680	10	0.015	0.056	GO:0036294	BP	3	cellular response to decreased oxygen levels	6	GNB1,KCNK2,PSMF1,CCNA2,PINK1,STC1,LMNA,CITED2,HIF1AN,OPA1
1		1	1642	680	93	0.137	0.057	GO:0033554	BP	3	cellular response to stress	4	SLC30A9,FAS,UBA6,GABARAPL2,TDP1,EIF2AK2,ATXN3,SP100,RNF126,MAP3K13,UBE2A,UBE2K,GNB1,KCNK2,HUWE1,DNAJB11,USP14,POLR2C,NBN,PPIF,RAD51C,DUSP3,FAF2,RAD1,OGG1,WNT5A,STK25,ID2,ATF2,UCHL5,RBBP6,C7ORF49,SOX4,CNOT1,INSIG2,PSMF1,NUP214,ZFP36,GPS2,EIF2S1,RBM17,PDGFRA,TBX3,GLUL,TANK,UGGT1,XPA,RNF121,NUP54,TMTC3,BRD4,APP,MCL1,CERS2,INTS7,PARP1,EIF2B5,CCNA2,INIP,CHEK1,IMPACT,CNOT8,NCK1,PINK1,STC1,AMFR,LMNA,PEA…
1		1	9	680	2	0.003	0.222	GO:0071501	BP	3	cellular response to sterol depletion	5	INSIG2,LMNA
1		1	249	680	22	0.032	0.088	GO:0034976	BP	3	response to endoplasmic reticulum stress	5	EIF2AK2,ATXN3,UBE2K,DNAJB11,USP14,FAF2,EIF2S1,UGGT1,RNF121,TMTC3,EIF2B5,NCK1,AMFR,LMNA,VCP,TMX3,PDIA3,UBXN6,CTDSP2,CREB3L2,OPA1,GET4
1		1	2	680	1	0.001	0.5	GO:0061857	BP	3	endoplasmic reticulum stress-induced pre-emptive quality control	6	VCP
1		1	3	680	1	0.001	0.333	GO:1990737	BP	3	response to manganese-induced endoplasmic reticulum stress	6	EIF2S1
1		1	87	680	9	0.013	0.103	GO:0036503	BP	3	ERAD pathway	6	ATXN3,USP14,FAF2,UGGT1,RNF121,AMFR,VCP,UBXN6,GET4
1		1	69	680	5	0.007	0.072	GO:0030433	BP	3	ubiquitin-dependent ERAD pathway	7	USP14,FAF2,RNF121,AMFR,VCP
1		1	718	680	38	0.056	0.053	GO:0006974	BP	3	cellular response to DNA damage stimulus	5	SLC30A9,UBA6,TDP1,ATXN3,SP100,UBE2A,HUWE1,POLR2C,NBN,RAD51C,RAD1,OGG1,ATF2,UCHL5,RBBP6,C7ORF49,SOX4,CNOT1,RBM17,TANK,XPA,BRD4,MCL1,INTS7,PARP1,INIP,CHEK1,CNOT8,PEA15,RCHY1,POLR2H,VCP,PTPN11,NUDT16,TLK1,ZNF830,ZSWIM7,ISY1
1		1	36	680	2	0.003	0.056	GO:0042769	BP	3	DNA damage response, detection of DNA damage	6	SOX4,PARP1
1		1	466	680	24	0.035	0.052	GO:0006281	BP	3	DNA repair	6	SLC30A9,TDP1,ATXN3,UBE2A,HUWE1,POLR2C,NBN,RAD51C,RAD1,OGG1,UCHL5,C7ORF49,RBM17,XPA,PARP1,INIP,CHEK1,RCHY1,POLR2H,VCP,NUDT16,ZNF830,ZSWIM7,ISY1
1		1	65	680	3	0.004	0.046	GO:0000726	BP	3	non-recombinational repair	7	NBN,OGG1,C7ORF49
1		1	41	680	3	0.004	0.073	GO:0006284	BP	3	base-excision repair	7	HUWE1,OGG1,XPA
1		1	10	680	1	0.001	0.1	GO:0006285	BP	3	base-excision repair, AP site formation	8	OGG1
1		1	3	680	1	0.001	0.333	GO:0045007	BP	3	depurination	9	OGG1
1		1	8	680	1	0.001	0.125	GO:0045008	BP	3	depyrimidination	9	OGG1
1		1	48	680	3	0.004	0.062	GO:0006301	BP	3	postreplication repair	7	UBE2A,RCHY1,VCP
1		1	180	680	10	0.015	0.056	GO:0006302	BP	3	double-strand break repair	7	TDP1,NBN,RAD51C,OGG1,C7ORF49,PARP1,CHEK1,VCP,NUDT16,ZSWIM7
1		1	19	680	1	0.001	0.053	GO:0000729	BP	3	DNA double-strand break processing	8	NBN
1		1	60	680	2	0.003	0.033	GO:0006303	BP	3	double-strand break repair via nonhomologous end joining	8	NBN,C7ORF49
1		1	5	680	1	0.001	0.2	GO:0045002	BP	3	double-strand break repair via single-strand annealing	8	OGG1
1		1	112	680	9	0.013	0.08	GO:0006289	BP	3	nucleotide-excision repair	7	SLC30A9,ATXN3,POLR2C,OGG1,XPA,PARP1,POLR2H,ZNF830,ISY1
1		1	72	680	5	0.007	0.069	GO:0006283	BP	3	transcription-coupled nucleotide-excision repair	8	POLR2C,XPA,POLR2H,ZNF830,ISY1
1		1	31	680	2	0.003	0.065	GO:0070911	BP	3	global genome nucleotide-excision repair	8	XPA,PARP1
1		1	39	680	3	0.004	0.077	GO:0033683	BP	3	nucleotide-excision repair, DNA incision	8	OGG1,XPA,PARP1
1		1	21	680	2	0.003	0.095	GO:0006295	BP	3	nucleotide-excision repair, DNA incision, 3'-to lesion	9	XPA,PARP1
1		1	36	680	2	0.003	0.056	GO:0006296	BP	3	nucleotide-excision repair, DNA incision, 5'-to lesion	9	XPA,PARP1
1		1	23	680	2	0.003	0.087	GO:0000715	BP	3	nucleotide-excision repair, DNA damage recognition	8	XPA,PARP1
1		1	21	680	2	0.003	0.095	GO:0000717	BP	3	nucleotide-excision repair, DNA duplex unwinding	8	XPA,PARP1
1		1	28	680	2	0.003	0.071	GO:0006294	BP	3	nucleotide-excision repair, preincision complex assembly	8	XPA,PARP1
1		1	43	680	1	0.001	0.023	GO:0036297	BP	3	interstrand cross-link repair	7	XPA
1		1	2	680	1	0.001	0.5	GO:1901255	BP	3	nucleotide-excision repair involved in interstrand cross-link repair	8	XPA
1		1	7	680	1	0.001	0.143	GO:0000012	BP	3	single strand break repair	7	TDP1
1		1	92	680	5	0.007	0.054	GO:0000725	BP	3	recombinational repair	7	NBN,RAD51C,PARP1,CHEK1,ZSWIM7
1		1	91	680	5	0.007	0.055	GO:0000724	BP	3	double-strand break repair via homologous recombination	8	NBN,RAD51C,PARP1,CHEK1,ZSWIM7
1		1	10	680	1	0.001	0.1	GO:0045003	BP	3	double-strand break repair via synthesis-dependent strand annealing	9	RAD51C
1		1	10	680	1	0.001	0.1	GO:0000730	BP	3	DNA recombinase assembly	10	RAD51C
1		1	12	680	1	0.001	0.083	GO:0051103	BP	3	DNA ligation involved in DNA repair	7	PARP1
1		1	3	680	1	0.001	0.333	GO:0043504	BP	3	mitochondrial DNA repair	7	PARP1
1		1	11	680	1	0.001	0.091	GO:0070914	BP	3	UV-damage excision repair	7	XPA
1		1	69	680	4	0.006	0.058	GO:0000731	BP	3	DNA synthesis involved in DNA repair	7	NBN,RAD51C,RCHY1,VCP
1		1	38	680	2	0.003	0.053	GO:0019985	BP	3	translesion synthesis	8	RCHY1,VCP
1		1	18	680	2	0.003	0.111	GO:0070987	BP	3	error-free translesion synthesis	9	RCHY1,VCP
1		1	8	680	1	0.001	0.125	GO:0006975	BP	3	DNA damage induced protein phosphorylation	6	CHEK1
1		1	17	680	2	0.003	0.118	GO:0098780	BP	3	response to mitochondrial depolarisation	5	PINK1,ATG13
1		1	102	680	5	0.007	0.049	GO:0034605	BP	3	cellular response to heat	5	ATXN3,NUP214,EIF2S1,NUP54,HDAC2
1		1	235	680	11	0.016	0.047	GO:0034599	BP	3	cellular response to oxidative stress	5	PPIF,STK25,PDGFRA,MCL1,PARP1,CCNA2,IMPACT,PINK1,HDAC2,PSAP,ETV5
1		1	70	680	5	0.007	0.071	GO:0036473	BP	3	cell death in response to oxidative stress	6	STK25,MCL1,PARP1,PINK1,PSAP
1		1	21	680	3	0.004	0.143	GO:0036475	BP	3	neuron death in response to oxidative stress	7	MCL1,PARP1,PINK1
1		1	127	680	8	0.012	0.063	GO:0034614	BP	3	cellular response to reactive oxygen species	6	PPIF,STK25,PDGFRA,CCNA2,IMPACT,PINK1,HDAC2,PSAP
1		1	12	680	2	0.003	0.167	GO:0097468	BP	3	programmed cell death in response to reactive oxygen species	7	STK25,PINK1
1		1	72	680	6	0.009	0.083	GO:0070301	BP	3	cellular response to hydrogen peroxide	7	PPIF,STK25,IMPACT,PINK1,HDAC2,PSAP
1		1	22	680	3	0.004	0.136	GO:0036474	BP	3	cell death in response to hydrogen peroxide	8	STK25,PINK1,PSAP
1		1	12	680	2	0.003	0.167	GO:0010421	BP	3	hydrogen peroxide-mediated programmed cell death	9	STK25,PINK1
1		1	3	680	1	0.001	0.333	GO:0036476	BP	3	neuron death in response to hydrogen peroxide	9	PINK1
1		1	15	680	1	0.001	0.067	GO:0071732	BP	3	cellular response to nitric oxide	7	CCNA2
1		1	29	680	1	0.001	0.034	GO:0071470	BP	3	cellular response to osmotic stress	5	DDX3X
1		1	140	680	13	0.019	0.093	GO:0035967	BP	3	cellular response to topologically incorrect protein	5	EIF2AK2,ATXN3,RNF126,DNAJB11,EIF2S1,UGGT1,RNF121,NCK1,AMFR,LMNA,VCP,CTDSP2,CREB3L2
1		1	124	680	11	0.016	0.089	GO:0034620	BP	3	cellular response to unfolded protein	6	EIF2AK2,DNAJB11,EIF2S1,UGGT1,RNF121,NCK1,AMFR,LMNA,VCP,CTDSP2,CREB3L2
1		1	21	680	4	0.006	0.19	GO:0071218	BP	3	cellular response to misfolded protein	6	ATXN3,RNF126,UGGT1,VCP
1		1	1	680	1	0.001	1	GO:0071629	BP	3	cytoplasm protein quality control by the ubiquitin-proteasome system	7	RNF126
1		1	12	680	2	0.003	0.167	GO:0071712	BP	3	ER-associated misfolded protein catabolic process	7	UGGT1,VCP
1		1	7	680	1	0.001	0.143	GO:0071455	BP	3	cellular response to hyperoxia	5	FAS
1		1	173	680	10	0.015	0.058	GO:0071456	BP	3	cellular response to hypoxia	5	GNB1,KCNK2,PSMF1,CCNA2,PINK1,STC1,LMNA,CITED2,HIF1AN,OPA1
1		1	186	680	8	0.012	0.043	GO:0031668	BP	3	cellular response to extracellular stimulus	4	FAS,GABARAPL2,EIF2AK2,COL1A1,EIF2S1,GLUL,IMPACT,FBXO22
1		1	161	680	8	0.012	0.05	GO:0031669	BP	3	cellular response to nutrient levels	5	FAS,GABARAPL2,EIF2AK2,COL1A1,EIF2S1,GLUL,IMPACT,FBXO22
1		1	10	680	1	0.001	0.1	GO:0043562	BP	3	cellular response to nitrogen levels	6	GABARAPL2
1		1	120	680	7	0.01	0.058	GO:0009267	BP	3	cellular response to starvation	6	FAS,GABARAPL2,EIF2AK2,EIF2S1,GLUL,IMPACT,FBXO22
1		1	36	680	1	0.001	0.028	GO:0042149	BP	3	cellular response to glucose starvation	7	IMPACT
1		1	41	680	4	0.006	0.098	GO:0034198	BP	3	cellular response to amino acid starvation	7	FAS,EIF2AK2,EIF2S1,IMPACT
1		1	7	680	1	0.001	0.143	GO:1990253	BP	3	cellular response to leucine starvation	8	IMPACT
1		1	10	680	1	0.001	0.1	GO:0006995	BP	3	cellular response to nitrogen starvation	7	GABARAPL2
1		1	34	680	1	0.001	0.029	GO:0031670	BP	3	cellular response to nutrient	6	COL1A1
1		1	25	680	1	0.001	0.04	GO:0071295	BP	3	cellular response to vitamin	7	COL1A1
1		1	2	680	1	0.001	0.5	GO:0071306	BP	3	cellular response to vitamin E	8	COL1A1
1		1	4298	680	213	0.313	0.05	GO:0032502	BP	3	developmental process	2	HCCS,CIAPIN1,RALA,IFRD1,PTBP1,ANLN,WWTR1,FAS,UBA6,MAP4,ELN,DKK3,EIF2AK2,AP3D1,ATXN3,EML1,SP100,MAPK6,FSTL3,TCF3,FOSL2,SART3,TULP3,GNB1,KCNK2,OXCT1,HUWE1,TBX5,PPP2R3C,HNRNPH3,TRIOBP,RBFOX2,MYH9,VRK1,NDRG3,DOK5,ARFRP1,SMARCA1,POLR2C,NBN,IMPAD1,VRK3,KDELR1,TMEM106B,PPP3CB,COL1A1,DUSP3,PRKAR1A,KLF3,EHD1,LIN7A,RAB35,COL12A1,PAK1IP1,PTP4A1,LAMA4,RAD1,DPYSL3,OGG1,WNT5A,TUSC2,STK25,ID2,PLEKHB2,SDC1,ATF2,…
1		1	128	680	9	0.013	0.07	GO:0098727	BP	3	maintenance of cell number	3	POLR2C,PHF19,SOX4,CNOT1,MED10,NOTCH2,TBX3,POLR2H,STAT3
1		1	179	680	7	0.01	0.039	GO:0021700	BP	3	developmental maturation	3	AP3D1,WNT5A,TUSC2,RECK,APP,AP1G1,OPA1
1		1	235	680	15	0.022	0.064	GO:0007568	BP	3	aging	3	OGG1,ID2,IDE,EIF2S1,TBX3,MBD1,APP,EIF2B5,CHEK1,AMFR,LMNA,CITED2,SRR,STAT3,OPA1
1		1	3990	680	196	0.288	0.049	GO:0048856	BP	3	anatomical structure development	3	HCCS,CIAPIN1,RALA,IFRD1,PTBP1,ANLN,WWTR1,FAS,UBA6,MAP4,ELN,DKK3,EIF2AK2,AP3D1,ATXN3,EML1,SP100,MAPK6,FSTL3,TCF3,FOSL2,SART3,TULP3,GNB1,KCNK2,OXCT1,TBX5,PPP2R3C,HNRNPH3,TRIOBP,RBFOX2,MYH9,VRK1,DOK5,ARFRP1,SMARCA1,NBN,IMPAD1,VRK3,KDELR1,TMEM106B,PPP3CB,COL1A1,DUSP3,PRKAR1A,KLF3,EHD1,LIN7A,RAB35,COL12A1,PAK1IP1,PTP4A1,LAMA4,RAD1,DPYSL3,WNT5A,TUSC2,STK25,ID2,SDC1,ATF2,WDR77,DOCK7,WLS,UCHL5,ECE1,RAB14…
1		1	143	680	4	0.006	0.028	GO:0031099	BP	3	regeneration	4	IFRD1,CERS2,CCNA2,PRPS1
1		1	14	680	2	0.003	0.143	GO:0071696	BP	3	ectodermal placode development	4	TBX3,HDAC2
1		1	112	680	4	0.006	0.036	GO:0071695	BP	3	anatomical structure maturation	4	WNT5A,RECK,APP,OPA1
1		1	48	680	1	0.001	0.021	GO:0048857	BP	3	neural nucleus development	4	RAD1
1		1	5	680	1	0.001	0.2	GO:0003360	BP	3	brainstem development	4	GART
1		1	480	680	23	0.034	0.048	GO:0061061	BP	3	muscle structure development	4	IFRD1,PTBP1,ELN,TCF3,KCNK2,TBX5,MYH9,PRKAR1A,EHD1,WNT5A,SDC1,NLN,OBSL1,PDGFRA,TBX3,PPP3CA,MMP14,LMNA,LEMD2,CITED2,HIF1AN,SMAD3,FBXO22
1		1	75	680	6	0.009	0.08	GO:0060021	BP	3	palate development	4	PAK1IP1,WNT5A,INSIG2,PDGFRA,TBX3,BBS7
1		1	52	680	6	0.009	0.115	GO:1904888	BP	3	cranial skeletal system development	4	TULP3,MTHFD1L,INSIG2,PDGFRA,MMP14,SMAD3
1		1	1346	680	65	0.096	0.048	GO:0009888	BP	3	tissue development	4	RALA,IFRD1,WWTR1,ELN,FOSL2,TULP3,KCNK2,OXCT1,TBX5,HNRNPH3,IMPAD1,COL1A1,PRKAR1A,COL12A1,WNT5A,ID2,SDC1,ATF2,WDR77,WLS,MTHFD1L,GPSM2,RBBP6,GLIPR2,NLN,RAP2C,OBSL1,SDC4,SOX4,PSMF1,TWSG1,SAFB2,HSD17B4,PDGFRA,TBX3,LAMC1,RDX,BBS7,PPP3CA,FRMD6,IQGAP1,MMP14,ETS2,STC1,LMNA,LEMD2,DDR2,POGLUT1,CITED2,SMAD3,FBXO22,RPSA,JUNB,ASXL1,CTDNEP1,CTNNBIP1,TMEM107,CREB3L2,EXT1,COL18A1,NBR1,HDAC2,PSAP,COL5A2,ETV5
1		1	843	680	36	0.053	0.043	GO:0060429	BP	3	epithelium development	5	RALA,WWTR1,FOSL2,TULP3,TBX5,HNRNPH3,WNT5A,ID2,SDC1,WDR77,MTHFD1L,GPSM2,RBBP6,RAP2C,SDC4,SOX4,PSMF1,SAFB2,HSD17B4,TBX3,RDX,BBS7,FRMD6,IQGAP1,MMP14,STC1,POGLUT1,CITED2,SMAD3,RPSA,CTNNBIP1,TMEM107,COL18A1,HDAC2,PSAP,ETV5
1		1	95	680	4	0.006	0.042	GO:0003158	BP	3	endothelium development	6	RAP2C,RDX,STC1,COL18A1
1		1	216	680	3	0.004	0.014	GO:0008544	BP	3	epidermis development	5	FOSL2,WNT5A,HDAC2
1		1	61	680	6	0.009	0.098	GO:0007492	BP	3	endoderm development	5	COL12A1,LAMC1,MMP14,SMAD3,EXT1,COL5A2
1		1	186	680	8	0.012	0.043	GO:0061448	BP	3	connective tissue development	5	OXCT1,IMPAD1,COL1A1,WNT5A,ATF2,STC1,SMAD3,CREB3L2
1		1	86	680	11	0.016	0.128	GO:0007498	BP	3	mesoderm development	5	PRKAR1A,WNT5A,WLS,TWSG1,TBX3,ETS2,POGLUT1,CITED2,SMAD3,CTDNEP1,EXT1
1		1	6	680	1	0.001	0.167	GO:0048318	BP	3	axial mesoderm development	6	POGLUT1
1		1	17	680	1	0.001	0.059	GO:0007398	BP	3	ectoderm development	5	ETS2
1		1	292	680	17	0.025	0.058	GO:0060537	BP	3	muscle tissue development	5	IFRD1,ELN,KCNK2,TBX5,PRKAR1A,WNT5A,NLN,OBSL1,PDGFRA,TBX3,PPP3CA,LMNA,LEMD2,POGLUT1,CITED2,SMAD3,FBXO22
1		1	279	680	16	0.024	0.057	GO:0014706	BP	3	striated muscle tissue development	6	IFRD1,ELN,KCNK2,TBX5,PRKAR1A,WNT5A,NLN,OBSL1,PDGFRA,TBX3,PPP3CA,LMNA,LEMD2,CITED2,SMAD3,FBXO22
1		1	550	680	27	0.04	0.049	GO:0060322	BP	3	head development	4	UBA6,EML1,TULP3,OXCT1,RBFOX2,SMARCA1,COL1A1,RAD1,WNT5A,DOCK7,WLS,UCHL5,TWSG1,UTP3,PDGFRA,TBX3,BBS7,CSNK1D,APP,EIF2B5,GART,PEX13,PAPD4,SUN1,SRR,PTPN11,EXT1
1		1	42	680	4	0.006	0.095	GO:0060324	BP	3	face development	4	COL1A1,WNT5A,PDGFRA,PTPN11
1		1	24	680	2	0.003	0.083	GO:1902742	BP	3	apoptotic process involved in development	4	PPP2R1B,CHEK1
1		1	2927	680	149	0.219	0.051	GO:0048869	BP	3	cellular developmental process	3	IFRD1,PTBP1,ANLN,WWTR1,FAS,UBA6,MAP4,EIF2AK2,AP3D1,EML1,MAPK6,FSTL3,TCF3,FOSL2,SART3,TULP3,HUWE1,TBX5,PPP2R3C,HNRNPH3,TRIOBP,RBFOX2,MYH9,VRK1,NDRG3,DOK5,SMARCA1,IMPAD1,VRK3,KDELR1,TMEM106B,PPP3CB,COL1A1,PRKAR1A,EHD1,RAB35,COL12A1,LAMA4,DPYSL3,WNT5A,TUSC2,STK25,ID2,PLEKHB2,SDC1,ATF2,WDR77,DOCK7,PHF19,GPSM2,GLIPR2,NLN,RAP2C,OBSL1,SDC4,RNF114,SOX4,PANK2,PSMF1,RRBP1,MACF1,ZFP36,MKLN1,TWSG1,SAFB2,PRRC…
1		1	2776	680	138	0.203	0.05	GO:0030154	BP	3	cell differentiation	4	IFRD1,PTBP1,ANLN,WWTR1,FAS,UBA6,MAP4,EIF2AK2,AP3D1,EML1,MAPK6,FSTL3,TCF3,FOSL2,TULP3,HUWE1,TBX5,PPP2R3C,HNRNPH3,TRIOBP,RBFOX2,MYH9,NDRG3,DOK5,SMARCA1,IMPAD1,KDELR1,TMEM106B,PPP3CB,COL1A1,PRKAR1A,EHD1,RAB35,COL12A1,LAMA4,DPYSL3,WNT5A,TUSC2,STK25,ID2,PLEKHB2,SDC1,ATF2,WDR77,DOCK7,PHF19,GPSM2,GLIPR2,NLN,RAP2C,OBSL1,SDC4,RNF114,SOX4,PANK2,PSMF1,RRBP1,MACF1,ZFP36,TWSG1,SAFB2,PRRC2B,NDFIP1,PTPRA,C12ORF…
1		1	197	680	8	0.012	0.041	GO:0048863	BP	3	stem cell differentiation	5	EIF2AK2,TCF3,TBX5,PHF19,PSMF1,PDGFRA,CITED2,STAT3
1		1	7	680	1	0.001	0.143	GO:0072497	BP	3	mesenchymal stem cell differentiation	6	PDGFRA
1		1	165	680	9	0.013	0.055	GO:0045444	BP	3	fat cell differentiation	5	WWTR1,LAMA4,WNT5A,ATF2,ZFP36,BBS7,SMAD3,ASXL1,METRNL
1		1	29	680	2	0.003	0.069	GO:0050873	BP	3	brown fat cell differentiation	6	LAMA4,METRNL
1		1	6	680	1	0.001	0.167	GO:0060290	BP	3	transdifferentiation	5	SMAD3
1		1	3	680	1	0.001	0.333	GO:0036446	BP	3	myofibroblast differentiation	5	PARP1
1		1	301	680	17	0.025	0.056	GO:0042692	BP	3	muscle cell differentiation	5	IFRD1,PTBP1,TCF3,TBX5,MYH9,PRKAR1A,EHD1,SDC1,NLN,OBSL1,PDGFRA,TBX3,PPP3CA,MMP14,LMNA,HIF1AN,FBXO22
1		1	64	680	4	0.006	0.062	GO:0045445	BP	3	myoblast differentiation	6	IFRD1,SDC1,TBX3,HIF1AN
1		1	195	680	13	0.019	0.067	GO:0051146	BP	3	striated muscle cell differentiation	6	TBX5,MYH9,PRKAR1A,EHD1,SDC1,NLN,OBSL1,PDGFRA,TBX3,PPP3CA,MMP14,LMNA,FBXO22
1		1	69	680	6	0.009	0.087	GO:0014902	BP	3	myotube differentiation	7	MYH9,EHD1,NLN,PPP3CA,MMP14,FBXO22
1		1	6	680	1	0.001	0.167	GO:0010668	BP	3	ectodermal cell differentiation	5	ETS2
1		1	414	680	22	0.032	0.053	GO:0030855	BP	3	epithelial cell differentiation	5	WWTR1,FOSL2,HNRNPH3,WNT5A,ID2,SDC1,WDR77,GPSM2,RAP2C,SOX4,SAFB2,HSD17B4,TBX3,RDX,FRMD6,IQGAP1,STC1,SMAD3,RPSA,COL18A1,HDAC2,PSAP
1		1	70	680	3	0.004	0.043	GO:0002065	BP	3	columnar/cuboidal epithelial cell differentiation	6	WNT5A,WDR77,SOX4
1		1	33	680	1	0.001	0.03	GO:0060563	BP	3	neuroepithelial cell differentiation	7	SOX4
1		1	33	680	2	0.003	0.061	GO:0002067	BP	3	glandular epithelial cell differentiation	7	WNT5A,WDR77
1		1	19	680	1	0.001	0.053	GO:0035883	BP	3	enteroendocrine cell differentiation	8	WNT5A
1		1	80	680	4	0.006	0.05	GO:0045446	BP	3	endothelial cell differentiation	6	RAP2C,RDX,STC1,COL18A1
1		1	131	680	3	0.004	0.023	GO:0009913	BP	3	epidermal cell differentiation	6	FOSL2,WNT5A,HDAC2
1		1	157	680	10	0.015	0.064	GO:0045165	BP	3	cell fate commitment	4	IFRD1,TCF3,WNT5A,ID2,DOCK7,NOTCH2,TBX3,MCL1,ETS2,STAT3
1		1	9	680	1	0.001	0.111	GO:0042693	BP	3	muscle cell fate commitment	5	TBX3
1		1	4	680	1	0.001	0.25	GO:0048625	BP	3	myoblast fate commitment	5	IFRD1
1		1	86	680	6	0.009	0.07	GO:0007569	BP	3	cell aging	4	ID2,TBX3,CHEK1,LMNA,CITED2,OPA1
1		1	12	680	1	0.001	0.083	GO:0090399	BP	3	replicative senescence	5	CHEK1
1		1	51	680	3	0.004	0.059	GO:0090398	BP	3	cellular senescence	5	ID2,TBX3,OPA1
1		1	26	680	3	0.004	0.115	GO:0001709	BP	3	cell fate determination	4	IFRD1,NOTCH2,MCL1
1		1	1	680	1	0.001	1	GO:0007518	BP	3	myoblast fate determination	5	IFRD1
1		1	1445	680	72	0.106	0.05	GO:0048468	BP	3	cell development	4	IFRD1,UBA6,MAP4,MAPK6,TCF3,FOSL2,TRIOBP,RBFOX2,MYH9,DOK5,IMPAD1,TMEM106B,PPP3CB,PRKAR1A,EHD1,RAB35,DPYSL3,WNT5A,TUSC2,STK25,ID2,SDC1,DOCK7,RAP2C,OBSL1,SDC4,SOX4,PANK2,MACF1,PTPRA,HSD17B4,PDGFRA,TBX3,LAMC1,RDX,ACTR2,SCARB2,PPP3CA,VPS33A,FRMD6,IQGAP1,CSNK1D,MBD1,APP,CERS2,ARF1,EIF2B5,FARP1,IMPACT,NCK1,STC1,LMNA,CITED2,AKIP1,SMAD3,FBXO22,CYB5D2,STAT3,ANTXR1,PTPN11,EXT1,COL18A1,BLOC1S2,WDR5,HDAC2,ATL…
1		1	55	680	1	0.001	0.018	GO:0048864	BP	3	stem cell development	5	CITED2
1		1	121	680	8	0.012	0.066	GO:0055001	BP	3	muscle cell development	5	PRKAR1A,SDC1,OBSL1,PDGFRA,TBX3,PPP3CA,LMNA,FBXO22
1		1	109	680	8	0.012	0.073	GO:0055002	BP	3	striated muscle cell development	6	PRKAR1A,SDC1,OBSL1,PDGFRA,TBX3,PPP3CA,LMNA,FBXO22
1		1	37	680	2	0.003	0.054	GO:0048747	BP	3	muscle fiber development	7	PPP3CA,FBXO22
1		1	21	680	2	0.003	0.095	GO:0014904	BP	3	myotube cell development	7	PPP3CA,FBXO22
1		1	142	680	10	0.015	0.07	GO:0002064	BP	3	epithelial cell development	5	FOSL2,WNT5A,SDC1,RAP2C,HSD17B4,RDX,FRMD6,IQGAP1,STC1,COL18A1
1		1	37	680	1	0.001	0.027	GO:0002066	BP	3	columnar/cuboidal epithelial cell development	6	WNT5A
1		1	20	680	1	0.001	0.05	GO:0002068	BP	3	glandular epithelial cell development	7	WNT5A
1		1	46	680	4	0.006	0.087	GO:0001885	BP	3	endothelial cell development	6	RAP2C,RDX,STC1,COL18A1
1		1	32	680	2	0.003	0.062	GO:0061028	BP	3	establishment of endothelial barrier	7	RAP2C,RDX
1		1	8	680	1	0.001	0.125	GO:0090557	BP	3	establishment of endothelial intestinal barrier	8	RAP2C
1		1	2	680	1	0.001	0.5	GO:0048627	BP	3	myoblast development	5	SDC1
1		1	110	680	3	0.004	0.027	GO:0048469	BP	3	cell maturation	4	TUSC2,APP,OPA1
1		1	1891	680	101	0.149	0.053	GO:0009653	BP	3	anatomical structure morphogenesis	3	HCCS,RALA,IFRD1,WWTR1,ELN,DKK3,SP100,SART3,TULP3,TBX5,TRIOBP,RBFOX2,MYH9,VRK1,DOK5,ARFRP1,IMPAD1,VRK3,TMEM106B,PPP3CB,COL1A1,PRKAR1A,EHD1,COL12A1,WNT5A,STK25,ID2,SDC1,ATF2,DOCK7,WLS,UCHL5,ECE1,MTHFD1L,RECK,OBSL1,SDC4,SOX4,INSIG2,PANK2,PSMF1,MACF1,MKLN1,TWSG1,PTPRA,ZMYM5,NOTCH2,PDGFRA,TBX3,LAMC1,C2ORF49,RDX,PPP2R1B,ACTR2,BBS7,PPP3CA,VPS33A,FRMD6,IQGAP1,CSNK1D,FOXK2,APP,RPL7L1,ARHGAP18,GNA12,CDC42E…
1		1	115	680	2	0.003	0.017	GO:0007164	BP	3	establishment of tissue polarity	4	WNT5A,PSMF1
1		1	13	680	2	0.003	0.154	GO:0071697	BP	3	ectodermal placode morphogenesis	4	TBX3,HDAC2
1		1	812	680	49	0.072	0.06	GO:0032989	BP	3	cellular component morphogenesis	4	IFRD1,SART3,TRIOBP,RBFOX2,MYH9,VRK1,DOK5,VRK3,TMEM106B,PPP3CB,PRKAR1A,WNT5A,STK25,DOCK7,OBSL1,PANK2,MACF1,MKLN1,PTPRA,ZMYM5,PDGFRA,LAMC1,RDX,ACTR2,PPP3CA,VPS33A,FRMD6,IQGAP1,CSNK1D,APP,ARHGAP18,GNA12,CDC42EP2,CSNK1G3,FARP1,IMPACT,CDC42SE2,STC1,AKIP1,ANTXR1,ASXL1,PTPN11,EXT1,COL18A1,CDC42SE1,ATL1,OPA1,NRAS,CUX1
1		1	741	680	46	0.068	0.062	GO:0000902	BP	3	cell morphogenesis	5	IFRD1,SART3,TRIOBP,RBFOX2,MYH9,VRK1,DOK5,VRK3,TMEM106B,PPP3CB,WNT5A,STK25,DOCK7,OBSL1,MACF1,MKLN1,PTPRA,ZMYM5,LAMC1,RDX,ACTR2,PPP3CA,VPS33A,FRMD6,IQGAP1,CSNK1D,APP,ARHGAP18,GNA12,CDC42EP2,CSNK1G3,FARP1,IMPACT,CDC42SE2,STC1,AKIP1,ANTXR1,ASXL1,PTPN11,EXT1,COL18A1,CDC42SE1,ATL1,OPA1,NRAS,CUX1
1		1	522	680	30	0.044	0.057	GO:0000904	BP	3	cell morphogenesis involved in differentiation	6	IFRD1,TRIOBP,RBFOX2,MYH9,DOK5,TMEM106B,PPP3CB,WNT5A,STK25,DOCK7,OBSL1,MACF1,PTPRA,LAMC1,ACTR2,PPP3CA,VPS33A,FRMD6,APP,FARP1,STC1,AKIP1,ANTXR1,PTPN11,EXT1,COL18A1,ATL1,OPA1,NRAS,CUX1
1		1	16	680	3	0.004	0.188	GO:0036344	BP	3	platelet morphogenesis	7	MYH9,VPS33A,PTPN11
1		1	76	680	4	0.006	0.053	GO:0034446	BP	3	substrate adhesion-dependent cell spreading	7	TRIOBP,LAMC1,AKIP1,ANTXR1
1		1	22	680	3	0.004	0.136	GO:0003382	BP	3	epithelial cell morphogenesis	7	FRMD6,STC1,COL18A1
1		1	9	680	2	0.003	0.222	GO:0001886	BP	3	endothelial cell morphogenesis	8	STC1,COL18A1
1		1	3	680	1	0.001	0.333	GO:0003383	BP	3	apical constriction	8	FRMD6
1		1	490	680	24	0.035	0.049	GO:0032990	BP	3	cell part morphogenesis	5	IFRD1,RBFOX2,DOK5,TMEM106B,PPP3CB,WNT5A,STK25,DOCK7,OBSL1,PANK2,MACF1,PTPRA,ACTR2,PPP3CA,IQGAP1,APP,FARP1,IMPACT,PTPN11,EXT1,ATL1,OPA1,NRAS,CUX1
1		1	473	680	23	0.034	0.049	GO:0048858	BP	3	cell projection morphogenesis	6	IFRD1,RBFOX2,DOK5,TMEM106B,PPP3CB,WNT5A,STK25,DOCK7,OBSL1,MACF1,PTPRA,ACTR2,PPP3CA,IQGAP1,APP,FARP1,IMPACT,PTPN11,EXT1,ATL1,OPA1,NRAS,CUX1
1		1	470	680	23	0.034	0.049	GO:0120039	BP	3	plasma membrane bounded cell projection morphogenesis	7	IFRD1,RBFOX2,DOK5,TMEM106B,PPP3CB,WNT5A,STK25,DOCK7,OBSL1,MACF1,PTPRA,ACTR2,PPP3CA,IQGAP1,APP,FARP1,IMPACT,PTPN11,EXT1,ATL1,OPA1,NRAS,CUX1
1		1	19	680	2	0.003	0.105	GO:0070584	BP	3	mitochondrion morphogenesis	6	PANK2,OPA1
1		1	44	680	3	0.004	0.068	GO:0010171	BP	3	body morphogenesis	4	COL1A1,PDGFRA,PTPN11
1		1	39	680	1	0.001	0.026	GO:0061383	BP	3	trabecula morphogenesis	4	COL1A1
1		1	11	680	1	0.001	0.091	GO:0061430	BP	3	bone trabecula morphogenesis	5	COL1A1
1		1	12	680	1	0.001	0.083	GO:0036342	BP	3	post-anal tail morphogenesis	4	WNT5A
1		1	515	680	19	0.028	0.037	GO:0048729	BP	3	tissue morphogenesis	4	RALA,TULP3,TBX5,PRKAR1A,WNT5A,WLS,MTHFD1L,SDC4,SOX4,PSMF1,TWSG1,TBX3,BBS7,MMP14,STC1,CITED2,SMAD3,CTNNBIP1,ETV5
1		1	57	680	6	0.009	0.105	GO:0048332	BP	3	mesoderm morphogenesis	5	PRKAR1A,WNT5A,WLS,TWSG1,TBX3,SMAD3
1		1	437	680	15	0.022	0.034	GO:0002009	BP	3	morphogenesis of an epithelium	5	RALA,TULP3,TBX5,WNT5A,MTHFD1L,SDC4,SOX4,PSMF1,TBX3,BBS7,MMP14,CITED2,SMAD3,CTNNBIP1,ETV5
1		1	14	680	1	0.001	0.071	GO:0060026	BP	3	convergent extension	6	WNT5A
1		1	19	680	1	0.001	0.053	GO:0060571	BP	3	morphogenesis of an epithelial fold	6	WNT5A
1		1	14	680	1	0.001	0.071	GO:0060572	BP	3	morphogenesis of an epithelial bud	7	WNT5A
1		1	45	680	1	0.001	0.022	GO:0002011	BP	3	morphogenesis of an epithelial sheet	6	WNT5A
1		1	126	680	2	0.003	0.016	GO:0001738	BP	3	morphogenesis of a polarized epithelium	6	WNT5A,PSMF1
1		1	115	680	2	0.003	0.017	GO:0001736	BP	3	establishment of planar polarity	7	WNT5A,PSMF1
1		1	15	680	1	0.001	0.067	GO:0042249	BP	3	establishment of planar polarity of embryonic epithelium	8	WNT5A
1		1	11	680	1	0.001	0.091	GO:0030859	BP	3	polarized epithelial cell differentiation	7	WNT5A
1		1	6	680	1	0.001	0.167	GO:0045198	BP	3	establishment of epithelial cell apical/basal polarity	8	WNT5A
1		1	32	680	3	0.004	0.094	GO:0060323	BP	3	head morphogenesis	4	COL1A1,PDGFRA,PTPN11
1		1	27	680	3	0.004	0.111	GO:0060325	BP	3	face morphogenesis	4	COL1A1,PDGFRA,PTPN11
1		1	20	680	1	0.001	0.05	GO:0060561	BP	3	apoptotic process involved in morphogenesis	4	PPP2R1B
1		1	769	680	37	0.054	0.048	GO:0048646	BP	3	anatomical structure formation involved in morphogenesis	3	RALA,SP100,TULP3,TBX5,MYH9,PPP3CB,COL1A1,PRKAR1A,EHD1,COL12A1,WNT5A,ATF2,WLS,MTHFD1L,OBSL1,SDC4,SOX4,TWSG1,PDGFRA,TBX3,VPS33A,RPL7L1,MMP14,ETS2,LEMD2,POGLUT1,CITED2,SMAD3,JUNB,PTPN11,COL18A1,CCBE1,RRP7A,HDAC2,COL5A2,SYNJ2BP,EMP2
1		1	13	680	2	0.003	0.154	GO:0060788	BP	3	ectodermal placode formation	4	TBX3,HDAC2
1		1	75	680	3	0.004	0.04	GO:0010927	BP	3	cellular component assembly involved in morphogenesis	4	PRKAR1A,OBSL1,PDGFRA
1		1	47	680	3	0.004	0.064	GO:0030239	BP	3	myofibril assembly	5	PRKAR1A,OBSL1,PDGFRA
1		1	32	680	2	0.003	0.062	GO:0045214	BP	3	sarcomere organization	6	PRKAR1A,OBSL1
1		1	8	680	1	0.001	0.125	GO:0071688	BP	3	striated muscle myosin thick filament assembly	5	OBSL1
1		1	34	680	2	0.003	0.059	GO:0006949	BP	3	syncytium formation	4	MYH9,EHD1
1		1	33	680	2	0.003	0.061	GO:0000768	BP	3	syncytium formation by plasma membrane fusion	5	MYH9,EHD1
1		1	24	680	2	0.003	0.083	GO:0007520	BP	3	myoblast fusion	6	MYH9,EHD1
1		1	398	680	14	0.021	0.035	GO:0007610	BP	3	behavior	2	UBA6,KCNK2,PPP3CB,ID2,ACTR2,APP,AMFR,PEX13,STAT3,PRKAR1B,HDAC2,GMFB,DPP4,ETV5
1		1	52	680	3	0.004	0.058	GO:0007631	BP	3	feeding behavior	3	APP,PEX13,STAT3
1		1	16	680	1	0.001	0.062	GO:0042755	BP	3	eating behavior	4	STAT3
1		1	48	680	3	0.004	0.062	GO:0051705	BP	3	multi-organism behavior	3	PPP3CB,APP,PEX13
1		1	10	680	2	0.003	0.2	GO:0001967	BP	3	suckling behavior	4	APP,PEX13
1		1	36	680	1	0.001	0.028	GO:0035176	BP	3	social behavior	4	PPP3CB
1		1	20	680	1	0.001	0.05	GO:0035640	BP	3	exploration behavior	3	DPP4
1		1	28	680	1	0.001	0.036	GO:0002209	BP	3	behavioral defense response	3	DPP4
1		1	4	680	1	0.001	0.25	GO:0061744	BP	3	motor behavior	3	DPP4
1		1	3	680	1	0.001	0.333	GO:0036343	BP	3	psychomotor behavior	4	DPP4
1		1	142	680	8	0.012	0.056	GO:0007626	BP	3	locomotory behavior	3	UBA6,PPP3CB,ID2,APP,PEX13,GMFB,DPP4,ETV5
1		1	13	680	1	0.001	0.077	GO:0035641	BP	3	locomotory exploration behavior	4	DPP4
1		1	6	680	1	0.001	0.167	GO:0031987	BP	3	locomotion involved in locomotory behavior	4	PPP3CB
1		1	8403	680	418	0.615	0.05	GO:0065007	BP	3	biological regulation	2	CIAPIN1,GCFC2,RALA,IFRD1,RNF216,PTBP1,ANLN,MAP4K5,SLC30A9,WWTR1,ZFP64,SERPINB1,UBR2,PHF20,KPNA6,FAS,BRD9,GABARAPL2,TBC1D23,DCUN1D1,MAP4,ELN,DKK3,TRAPPC3,EIF2AK2,MED29,AP3D1,ZC3H15,NFYC,ATXN3,DDX3Y,SP100,MAPK6,GNB5,FSTL3,RNF126,TCF3,MAP3K13,LMAN1,FOSL2,RAB7A,SART3,UBE2A,UBE2K,TULP3,GNB1,MKNK1,STK17B,KCNK2,DIS3,OXCT1,WBP11,HUWE1,KHSRP,ANKRD10,NSFL1C,SNX5,TASP1,TBX5,BRAP,DNAJB11,PPP2R3C,SCD,CIRBP,TR…
1		1	2592	680	123	0.181	0.047	GO:0065008	BP	3	regulation of biological quality	3	IFRD1,FAS,ELN,DKK3,AP3D1,SP100,LMAN1,RAB7A,SART3,UBE2K,GNB1,KCNK2,DIS3,OXCT1,KHSRP,PPP2R3C,CIRBP,TRIOBP,RBFOX2,MYH9,VRK1,DNAJC5,TM9SF4,NBN,VRK3,KDELR1,PPP3CB,GLRX3,PPIF,RAD51C,COL1A1,PRKAR1A,EHD1,LIN7A,SLC38A1,WNT5A,TUSC2,SNX4,ID2,ATF2,ECE1,SUPT7L,IDE,GPSM2,SOX4,PANK2,PSMF1,HNRNPR,NUP214,MACF1,ZFP36,POT1,MKLN1,EXOSC2,NDFIP1,HSD17B4,PDGFRA,TBX3,GLUL,NMT1,CCDC115,SLC31A1,RDX,ACTR2,RAP1GDS1,G3BP2,PP…
1		1	355	680	18	0.026	0.051	GO:0090066	BP	3	regulation of anatomical structure size	4	IFRD1,ELN,TRIOBP,WNT5A,ECE1,MACF1,RDX,ACTR2,RAP1GDS1,ARF1,ARHGAP18,CDC42EP2,TMEM123,KCNMA1,NCK1,RAB3B,GMFB,TRIM27
1		1	88	680	2	0.003	0.023	GO:0035150	BP	3	regulation of tube size	5	ECE1,RAP1GDS1
1		1	81	680	2	0.003	0.025	GO:0035296	BP	3	regulation of tube diameter	6	ECE1,RAP1GDS1
1		1	273	680	16	0.024	0.059	GO:0032535	BP	3	regulation of cellular component size	5	IFRD1,ELN,TRIOBP,WNT5A,MACF1,RDX,ACTR2,ARF1,ARHGAP18,CDC42EP2,TMEM123,KCNMA1,NCK1,RAB3B,GMFB,TRIM27
1		1	2	680	1	0.001	0.5	GO:0097494	BP	3	regulation of vesicle size	6	RAB3B
1		1	132	680	6	0.009	0.045	GO:0008361	BP	3	regulation of cell size	6	IFRD1,WNT5A,MACF1,RDX,TMEM123,KCNMA1
1		1	10	680	1	0.001	0.1	GO:0045792	BP	3	negative regulation of cell size	7	RDX
1		1	9	680	1	0.001	0.111	GO:0045793	BP	3	positive regulation of cell size	7	TMEM123
1		1	1	680	1	0.001	1	GO:0070267	BP	3	oncosis	8	TMEM123
1		1	85	680	3	0.004	0.035	GO:0050803	BP	3	regulation of synapse structure or activity	4	WNT5A,APP,ETV5
1		1	317	680	16	0.024	0.05	GO:0010817	BP	3	regulation of hormone levels	4	DKK3,OXCT1,PPP3CB,SNX4,ECE1,IDE,SOX4,HSD17B4,PDGFRA,TBX3,GLUL,PPP3CA,RAB8B,PTPN11,BACE2,DPP4
1		1	119	680	7	0.01	0.059	GO:0042445	BP	3	hormone metabolic process	5	DKK3,ECE1,IDE,HSD17B4,PDGFRA,PTPN11,BACE2
1		1	71	680	4	0.006	0.056	GO:0034754	BP	3	cellular hormone metabolic process	6	DKK3,ECE1,HSD17B4,PDGFRA
1		1	5	680	1	0.001	0.2	GO:0008212	BP	3	mineralocorticoid metabolic process	7	DKK3
1		1	17	680	1	0.001	0.059	GO:0008209	BP	3	androgen metabolic process	7	HSD17B4
1		1	26	680	1	0.001	0.038	GO:0008207	BP	3	C21-steroid hormone metabolic process	7	DKK3
1		1	5	680	1	0.001	0.2	GO:0032341	BP	3	aldosterone metabolic process	8	DKK3
1		1	17	680	2	0.003	0.118	GO:0008210	BP	3	estrogen metabolic process	7	HSD17B4,PDGFRA
1		1	48	680	1	0.001	0.021	GO:0042446	BP	3	hormone biosynthetic process	6	DKK3
1		1	5	680	1	0.001	0.2	GO:0006705	BP	3	mineralocorticoid biosynthetic process	7	DKK3
1		1	19	680	1	0.001	0.053	GO:0006700	BP	3	C21-steroid hormone biosynthetic process	7	DKK3
1		1	5	680	1	0.001	0.2	GO:0032342	BP	3	aldosterone biosynthetic process	8	DKK3
1		1	8	680	2	0.003	0.25	GO:0042447	BP	3	hormone catabolic process	6	ECE1,IDE
1		1	1	680	1	0.001	1	GO:0010816	BP	3	calcitonin catabolic process	7	ECE1
1		1	24	680	2	0.003	0.083	GO:0016486	BP	3	peptide hormone processing	6	ECE1,BACE2
1		1	1205	680	51	0.075	0.042	GO:0042592	BP	3	homeostatic process	4	FAS,AP3D1,SP100,RAB7A,SART3,UBE2K,GNB1,OXCT1,PPP2R3C,RBFOX2,TM9SF4,NBN,PPP3CB,GLRX3,RAD51C,PRKAR1A,EHD1,IDE,SOX4,POT1,NDFIP1,PDGFRA,CCDC115,SLC31A1,RAP1GDS1,PPP3CA,VPS33A,APP,MCL1,UBAP2L,ARF1,PARP1,HDAC8,OGT,ATP6V1B2,KCNMA1,SPPL3,PINK1,STC1,CITED2,TMX3,SMAD3,PDIA3,STAT3,ASXL1,METRNL,PTPN11,GLRX5,PRKAR1B,ZNF830,OPA1
1		1	291	680	9	0.013	0.031	GO:0060249	BP	3	anatomical structure homeostasis	5	SP100,RAB7A,NBN,RAD51C,POT1,PARP1,HDAC8,PTPN11,ZNF830
1		1	139	680	6	0.009	0.043	GO:0000723	BP	3	telomere maintenance	6	SP100,NBN,RAD51C,POT1,PARP1,HDAC8
1		1	8	680	1	0.001	0.125	GO:0090657	BP	3	telomeric loop disassembly	7	POT1
1		1	6	680	1	0.001	0.167	GO:0061820	BP	3	telomeric D-loop disassembly	8	POT1
1		1	72	680	2	0.003	0.028	GO:0010833	BP	3	telomere maintenance via telomere lengthening	7	POT1,PARP1
1		1	64	680	1	0.001	0.016	GO:0007004	BP	3	telomere maintenance via telomerase	8	POT1
1		1	45	680	2	0.003	0.044	GO:0016233	BP	3	telomere capping	7	NBN,POT1
1		1	4	680	1	0.001	0.25	GO:0031860	BP	3	telomeric 3' overhang formation	8	NBN
1		1	13	680	1	0.001	0.077	GO:0090737	BP	3	telomere maintenance via telomere trimming	7	NBN
1		1	13	680	1	0.001	0.077	GO:0090656	BP	3	t-circle formation	8	NBN
1		1	13	680	1	0.001	0.077	GO:0000722	BP	3	telomere maintenance via recombination	7	RAD51C
1		1	744	680	30	0.044	0.04	GO:0048878	BP	3	chemical homeostasis	5	AP3D1,RAB7A,GNB1,OXCT1,PPP2R3C,TM9SF4,PPP3CB,PRKAR1A,EHD1,SOX4,NDFIP1,PDGFRA,CCDC115,SLC31A1,RAP1GDS1,PPP3CA,VPS33A,APP,ARF1,PARP1,OGT,ATP6V1B2,KCNMA1,SPPL3,STC1,SMAD3,STAT3,PTPN11,PRKAR1B,OPA1
1		1	84	680	1	0.001	0.012	GO:0055088	BP	3	lipid homeostasis	6	EHD1
1		1	52	680	1	0.001	0.019	GO:0055092	BP	3	sterol homeostasis	7	EHD1
1		1	52	680	1	0.001	0.019	GO:0042632	BP	3	cholesterol homeostasis	8	EHD1
1		1	165	680	8	0.012	0.048	GO:0033500	BP	3	carbohydrate homeostasis	6	OXCT1,PPP3CB,SOX4,PPP3CA,OGT,STAT3,PTPN11,OPA1
1		1	165	680	8	0.012	0.048	GO:0042593	BP	3	glucose homeostasis	7	OXCT1,PPP3CB,SOX4,PPP3CA,OGT,STAT3,PTPN11,OPA1
1		1	510	680	19	0.028	0.037	GO:0050801	BP	3	ion homeostasis	6	AP3D1,RAB7A,GNB1,PPP2R3C,TM9SF4,NDFIP1,PDGFRA,CCDC115,SLC31A1,RAP1GDS1,VPS33A,APP,ARF1,PARP1,ATP6V1B2,KCNMA1,SPPL3,STC1,SMAD3
1		1	450	680	17	0.025	0.038	GO:0055080	BP	3	cation homeostasis	7	AP3D1,RAB7A,GNB1,TM9SF4,NDFIP1,PDGFRA,CCDC115,SLC31A1,RAP1GDS1,VPS33A,APP,ARF1,ATP6V1B2,KCNMA1,SPPL3,STC1,SMAD3
1		1	462	680	17	0.025	0.037	GO:0098771	BP	3	inorganic ion homeostasis	7	AP3D1,RAB7A,GNB1,TM9SF4,NDFIP1,PDGFRA,CCDC115,SLC31A1,RAP1GDS1,VPS33A,APP,ARF1,ATP6V1B2,KCNMA1,SPPL3,STC1,SMAD3
1		1	285	680	8	0.012	0.028	GO:0072507	BP	3	divalent inorganic cation homeostasis	8	AP3D1,GNB1,PDGFRA,RAP1GDS1,APP,SPPL3,STC1,SMAD3
1		1	101	680	6	0.009	0.059	GO:0055067	BP	3	monovalent inorganic cation homeostasis	8	RAB7A,TM9SF4,CCDC115,VPS33A,ATP6V1B2,KCNMA1
1		1	77	680	5	0.007	0.065	GO:0006885	BP	3	regulation of pH	9	RAB7A,TM9SF4,CCDC115,VPS33A,ATP6V1B2
1		1	40	680	3	0.004	0.075	GO:0045851	BP	3	pH reduction	10	RAB7A,CCDC115,ATP6V1B2
1		1	388	680	13	0.019	0.034	GO:0055065	BP	3	metal ion homeostasis	8	AP3D1,GNB1,NDFIP1,PDGFRA,CCDC115,SLC31A1,RAP1GDS1,APP,ARF1,KCNMA1,SPPL3,STC1,SMAD3
1		1	106	680	6	0.009	0.057	GO:0055076	BP	3	transition metal ion homeostasis	9	AP3D1,NDFIP1,CCDC115,SLC31A1,APP,ARF1
1		1	75	680	2	0.003	0.027	GO:0055072	BP	3	iron ion homeostasis	10	NDFIP1,CCDC115
1		1	15	680	3	0.004	0.2	GO:0055070	BP	3	copper ion homeostasis	10	SLC31A1,APP,ARF1
1		1	18	680	1	0.001	0.056	GO:0055069	BP	3	zinc ion homeostasis	10	AP3D1
1		1	10	680	1	0.001	0.1	GO:0055075	BP	3	potassium ion homeostasis	9	KCNMA1
1		1	263	680	7	0.01	0.027	GO:0055074	BP	3	calcium ion homeostasis	9	GNB1,PDGFRA,RAP1GDS1,APP,SPPL3,STC1,SMAD3
1		1	40	680	2	0.003	0.05	GO:0030104	BP	3	water homeostasis	6	PRKAR1A,PRKAR1B
1		1	181	680	10	0.015	0.055	GO:0048872	BP	3	homeostasis of number of cells	5	FAS,SART3,PPP2R3C,RBFOX2,PPP3CB,UBAP2L,CITED2,STAT3,ASXL1,PTPN11
1		1	4	680	1	0.001	0.25	GO:0061484	BP	3	hematopoietic stem cell homeostasis	6	UBAP2L
1		1	633	680	31	0.046	0.049	GO:0019725	BP	3	cellular homeostasis	5	AP3D1,RAB7A,UBE2K,GNB1,OXCT1,TM9SF4,PPP3CB,GLRX3,IDE,SOX4,NDFIP1,PDGFRA,CCDC115,SLC31A1,RAP1GDS1,PPP3CA,VPS33A,APP,MCL1,ARF1,OGT,ATP6V1B2,KCNMA1,SPPL3,PINK1,STC1,TMX3,SMAD3,PDIA3,GLRX5,OPA1
1		1	8	680	3	0.004	0.375	GO:0010992	BP	3	ubiquitin recycling	6	UBE2K,IDE,PINK1
1		1	6	680	2	0.003	0.333	GO:0010994	BP	3	free ubiquitin chain polymerization	7	UBE2K,PINK1
1		1	512	680	23	0.034	0.045	GO:0055082	BP	3	cellular chemical homeostasis	6	AP3D1,RAB7A,GNB1,OXCT1,TM9SF4,PPP3CB,SOX4,NDFIP1,PDGFRA,CCDC115,SLC31A1,RAP1GDS1,PPP3CA,VPS33A,APP,ARF1,OGT,ATP6V1B2,KCNMA1,SPPL3,STC1,SMAD3,OPA1
1		1	414	680	17	0.025	0.041	GO:0006873	BP	3	cellular ion homeostasis	7	AP3D1,RAB7A,GNB1,TM9SF4,NDFIP1,PDGFRA,CCDC115,SLC31A1,RAP1GDS1,VPS33A,APP,ARF1,ATP6V1B2,KCNMA1,SPPL3,STC1,SMAD3
1		1	403	680	17	0.025	0.042	GO:0030003	BP	3	cellular cation homeostasis	8	AP3D1,RAB7A,GNB1,TM9SF4,NDFIP1,PDGFRA,CCDC115,SLC31A1,RAP1GDS1,VPS33A,APP,ARF1,ATP6V1B2,KCNMA1,SPPL3,STC1,SMAD3
1		1	85	680	6	0.009	0.071	GO:0030004	BP	3	cellular monovalent inorganic cation homeostasis	9	RAB7A,TM9SF4,CCDC115,VPS33A,ATP6V1B2,KCNMA1
1		1	73	680	5	0.007	0.068	GO:0030641	BP	3	regulation of cellular pH	10	RAB7A,TM9SF4,CCDC115,VPS33A,ATP6V1B2
1		1	70	680	5	0.007	0.071	GO:0051453	BP	3	regulation of intracellular pH	11	RAB7A,TM9SF4,CCDC115,VPS33A,ATP6V1B2
1		1	39	680	3	0.004	0.077	GO:0051452	BP	3	intracellular pH reduction	12	RAB7A,CCDC115,ATP6V1B2
1		1	19	680	1	0.001	0.053	GO:0007035	BP	3	vacuolar acidification	13	CCDC115
1		1	22	680	2	0.003	0.091	GO:0090383	BP	3	phagosome acidification	13	RAB7A,ATP6V1B2
1		1	11	680	2	0.003	0.182	GO:0035751	BP	3	regulation of lysosomal lumen pH	12	CCDC115,VPS33A
1		1	7	680	1	0.001	0.143	GO:0007042	BP	3	lysosomal lumen acidification	13	CCDC115
1		1	273	680	8	0.012	0.029	GO:0072503	BP	3	cellular divalent inorganic cation homeostasis	9	AP3D1,GNB1,PDGFRA,RAP1GDS1,APP,SPPL3,STC1,SMAD3
1		1	341	680	13	0.019	0.038	GO:0006875	BP	3	cellular metal ion homeostasis	9	AP3D1,GNB1,NDFIP1,PDGFRA,CCDC115,SLC31A1,RAP1GDS1,APP,ARF1,KCNMA1,SPPL3,STC1,SMAD3
1		1	79	680	6	0.009	0.076	GO:0046916	BP	3	cellular transition metal ion homeostasis	10	AP3D1,NDFIP1,CCDC115,SLC31A1,APP,ARF1
1		1	52	680	2	0.003	0.038	GO:0006879	BP	3	cellular iron ion homeostasis	11	NDFIP1,CCDC115
1		1	12	680	3	0.004	0.25	GO:0006878	BP	3	cellular copper ion homeostasis	11	SLC31A1,APP,ARF1
1		1	17	680	1	0.001	0.059	GO:0006882	BP	3	cellular zinc ion homeostasis	11	AP3D1
1		1	256	680	7	0.01	0.027	GO:0006874	BP	3	cellular calcium ion homeostasis	10	GNB1,PDGFRA,RAP1GDS1,APP,SPPL3,STC1,SMAD3
1		1	187	680	4	0.006	0.021	GO:0051480	BP	3	regulation of cytosolic calcium ion concentration	11	GNB1,PDGFRA,SPPL3,SMAD3
1		1	5	680	1	0.001	0.2	GO:0051481	BP	3	negative regulation of cytosolic calcium ion concentration	12	SMAD3
1		1	172	680	3	0.004	0.017	GO:0007204	BP	3	positive regulation of cytosolic calcium ion concentration	12	GNB1,PDGFRA,SPPL3
1		1	19	680	1	0.001	0.053	GO:0051560	BP	3	mitochondrial calcium ion homeostasis	11	RAP1GDS1
1		1	10	680	1	0.001	0.1	GO:0051561	BP	3	positive regulation of mitochondrial calcium ion concentration	12	RAP1GDS1
1		1	22	680	2	0.003	0.091	GO:0032469	BP	3	endoplasmic reticulum calcium ion homeostasis	11	RAP1GDS1,APP
1		1	9	680	1	0.001	0.111	GO:0032471	BP	3	negative regulation of endoplasmic reticulum calcium ion concentration	12	RAP1GDS1
1		1	2	680	1	0.001	0.5	GO:0051563	BP	3	smooth endoplasmic reticulum calcium ion homeostasis	12	APP
1		1	9	680	1	0.001	0.111	GO:0030007	BP	3	cellular potassium ion homeostasis	10	KCNMA1
1		1	105	680	6	0.009	0.057	GO:0001678	BP	3	cellular glucose homeostasis	7	OXCT1,PPP3CB,SOX4,PPP3CA,OGT,OPA1
[truncated: 4,985 more rows]
